# Supplementary material for: ASCoVPred: a machine learning-based platform for quantitative prediction of anti-SARS-CoV-2 activity and human cell toxicity of molecules
Source: Research Square preprint supplement (doi:10.21203/rs.3.rs-967196/v1), 2021-10-13
Supplement: Supplementary file 5 [file 3e580a6d4c7cbe9bb8f50bbe.xlsx]

## Sheet: Assay-9-ML-Results
Table 1. Summary of whole descriptors/fingerprints-based datasets.
Sr.No.	Descriptors / FPs Type	Total number of descriptors / FPs	Unique records	Training set molecules	Validation set molecules	Maximum descriptors allowed	Model building status
1	1D & 2D	1444	10272	8218	2054	1643.6	Yes
2	Fingerprinter	1024	11002	8802	2200	1760.4	Yes
3	ExtendedFingerprinter	1024	11014	8811	2203	1762.2	Yes
4	EStateFingerprinter	79	9061	7249	1812	1449.8	Yes
5	GraphOnlyFingerprinter	1024	10652	8522	2130	1704.4	Yes
6	MACCSFingerprinter	166	10842	8674	2168	1734.8	Yes
7	PubchemFingerprinter	881	10878	8702	2176	1740.4	Yes
8	SubstructureFingerprinter	307	10404	8323	2081	1664.6	Yes
9	SubstructureFingerprintCount	307	11007	8806	2201	1761.2	Yes
10	KlekotaRothFingerprinter	4860	11007	8806	2201	1761.2	No
11	KlekotaRothFingerprintCount	4860	11058	8846	2212	1769.2	No
12	AtomPairs2DFingerprinter	780	9773	7818	1955	1563.6	Yes
13	AtomPairs2DFingerprintCount	780	10892	8714	2178	1742.8	Yes
Table 2. Summary of selected descriptors/fingerprints-based datasets.
Sr.No.	Descriptors / FPs Type	Number of descriptors / FPs after feature selection	Unique records	Training set molecules	Validation set molecules	Maximum descriptors allowed	Model building status
1	1D & 2D	53	10272	8218	2054	1643.6	Yes
2	Fingerprinter	25	9335	7468	1867	1493.6	Yes
3	ExtendedFingerprinter	23	8205	6564	1641	1312.8	Yes
4	EStateFingerprinter	17	5760	4608	1152	921.6	Yes
5	GraphOnlyFingerprinter	51	6698	5358	1340	1071.6	Yes
6	MACCSFingerprinter	6	5714	4571	1143	914.2	Yes
7	PubchemFingerprinter	29	5731	4585	1146	917	Yes
8	SubstructureFingerprinter	15	5729	4583	1146	916.6	Yes
9	SubstructureFingerprintCount	46	5861	4689	1172	937.8	Yes
10	KlekotaRothFingerprinter	116	5819	4655	1164	931	Yes
11	KlekotaRothFingerprintCount	241	6032	4826	1206	965.2	Yes
12	AtomPairs2DFingerprinter	16	5688	4550	1138	910	Yes
13	AtomPairs2DFingerprintCount	64	5964	4771	1193	954.2	Yes
Table 3. Best five models performance with whole and selected descriptors/fingerprints-based datasets.
	Descriptors/FPs Type	Unique records	Training Set Molecules	Validation Set Molecules	Number of descriptors / FPs used	R	MAE	RMSE	Technique Used
	1D & 2D	10272	8218	2054	1444	0.39	6.01	11.08	weka.classifiers.meta.RandomCommittee (RandomForest)
		10272	8218	2054	1444	0.39	6.01	11.09	weka.classifiers.meta.RandomSubSpace (RandomForest)
		10272	8218	2054	1444	0.39	6.03	11.07	weka.classifiers.meta.Bagging (RandomForest)
		10272	8218	2054	1444	0.38	6.05	11.15	weka.classifiers.trees.RandomForest
		10272	8218	2054	1444	0.38	6.11	11.48	weka.classifiers.meta.AdditiveRegression (RandomForest)
	Descriptors/FPs Type	Unique records	Training Set Molecules	Validation Set Molecules	Number of descriptors / FPs used	R	MAE	RMSE	Technique Used
	Fingerprinter	11002	8802	2200	1024	0.3	6.16	11.82	weka.classifiers.meta.RandomSubSpace (M5P)
		11002	8802	2200	1024	0.3	6.4	11.83	weka.classifiers.functions.GaussianProcesses (NormalizedPolyKernel)
		11002	8802	2200	1024	0.3	6.51	11.94	weka.classifiers.meta.RandomSubSpace (RandomForest)
		11002	8802	2200	1024	0.3	6.34	12.35	weka.classifiers.functions.SMOreg (RBFKernel)
		11002	8802	2200	1024	0.29	6.92	12.06	weka.classifiers.functions.LinearRegression (M5 method)
	Descriptors/FPs Type	Unique records	Training Set Molecules	Validation Set Molecules	Number of descriptors / FPs used	R	MAE	RMSE	Technique Used
	ExtendedFingerprinter	11014	8811	2203	1024	0.32	6.33	12.3	weka.classifiers.functions.SMOreg (RBFKernel)
		11014	8811	2203	1024	0.32	6.51	11.83	weka.classifiers.meta.RandomSubSpace (RandomForest)
		11014	8811	2203	1024	0.32	6.53	11.83	weka.classifiers.meta.RandomCommittee (RandomForest)
		11014	8811	2203	1024	0.32	6.18	11.75	weka.classifiers.meta.RandomSubSpace (M5P)
		11014	8811	2203	1024	0.31	6.58	11.8	weka.classifiers.meta.Bagging (RandomForest)
	Descriptors/FPs Type	Unique records	Training Set Molecules	Validation Set Molecules	Number of descriptors / FPs used	R	MAE	RMSE	Technique Used
	EStateFingerprinter	9061	7249	1812	79	0.26	6.44	12.42	weka.classifiers.meta.RandomCommittee (RandomForest)
		9061	7249	1812	79	0.26	6.39	12.18	weka.classifiers.functions.GaussianProcesses (Puk)
		9061	7249	1812	79	0.25	6.64	12.99	weka.classifiers.meta.AdditiveRegression (RandomForest)
		9061	7249	1812	79	0.25	6.44	12.33	weka.classifiers.meta.Bagging (RandomForest)
		9061	7249	1812	79	0.25	6.46	12.49	weka.classifiers.trees.RandomForest
	Descriptors/FPs Type	Unique records	Training Set Molecules	Validation Set Molecules	Number of descriptors / FPs used	R	MAE	RMSE	Technique Used
	GraphOnlyFingerprinter	10652	8522	2130	1024	0.3	6.36	12.08	weka.classifiers.meta.RandomCommittee (RandomForest)
		10652	8522	2130	1024	0.3	6.35	12.04	weka.classifiers.meta.RandomSubSpace (RandomForest)
		10652	8522	2130	1024	0.3	6.36	11.97	weka.classifiers.meta.Bagging (RandomForest)
		10652	8522	2130	1024	0.29	6.4	12.13	weka.classifiers.trees.RandomForest
		10652	8522	2130	1024	0.29	6.55	12.75	weka.classifiers.meta.AdditiveRegression (RandomForest)
	Descriptors/FPs Type	Unique records	Training Set Molecules	Validation Set Molecules	Number of descriptors / FPs used	R	MAE	RMSE	Technique Used
	MACCSFingerprinter	10842	8674	2168	166	0.38	6.15	11.55	weka.classifiers.meta.RandomCommittee (RandomForest)
		10842	8674	2168	166	0.37	6.14	11.56	weka.classifiers.meta.RandomSubSpace (RandomForest)
		10842	8674	2168	166	0.37	6.19	11.61	weka.classifiers.trees.RandomForest
		10842	8674	2168	166	0.37	6.18	11.52	weka.classifiers.meta.Bagging (RandomForest)
		10842	8674	2168	166	0.37	6.28	12.17	weka.classifiers.meta.AdditiveRegression (RandomForest)
	Descriptors/FPs Type	Unique records	Training Set Molecules	Validation Set Molecules	Number of descriptors / FPs used	R	MAE	RMSE	Technique Used
	PubchemFingerprinter	10878	8702	2176	881	0.36	6.04	11.53	weka.classifiers.meta.Bagging (RandomForest)
		10878	8702	2176	881	0.36	6.19	11.54	weka.classifiers.functions.GaussianProcesses (RBFKernel)
		10878	8702	2176	881	0.36	6.03	11.61	weka.classifiers.meta.RandomCommittee (RandomForest)
		10878	8702	2176	881	0.35	6.03	11.62	weka.classifiers.meta.RandomSubSpace (RandomForest)
		10878	8702	2176	881	0.35	6.05	11.65	weka.classifiers.trees.RandomForest
	Descriptors/FPs Type	Unique records	Training Set Molecules	Validation Set Molecules	Number of descriptors / FPs used	R	MAE	RMSE	Technique Used
	SubstructureFingerprinter	10404	8323	2081	307	0.35	6.13	11.7	weka.classifiers.meta.RandomSubSpace (RandomForest)
		10404	8323	2081	307	0.34	6.14	11.88	weka.classifiers.meta.RandomCommittee (RandomForest)
		10404	8323	2081	307	0.34	6.14	11.91	weka.classifiers.trees.RandomForest
		10404	8323	2081	307	0.34	6.13	11.78	weka.classifiers.meta.Bagging (RandomForest)
		10404	8323	2081	307	0.33	6.37	12.55	weka.classifiers.meta.AdditiveRegression (RandomForest)
	Descriptors/FPs Type	Unique records	Training Set Molecules	Validation Set Molecules	Number of descriptors / FPs used	R	MAE	RMSE	Technique Used
	SubstructureFingerprintCount	11007	8806	2201	307	0.4	5.9	11.31	weka.classifiers.meta.RandomCommittee (RandomForest)
		Validation dataset performance		2201	307	0.4469	5.1128	9.1438
		11007	8806	2201	307	0.4	5.97	11.29	weka.classifiers.meta.Bagging (M5P)
		11007	8806	2201	307	0.4	5.94	11.35	weka.classifiers.meta.RandomSubSpace (RandomForest)
		11007	8806	2201	307	0.39	5.93	11.33	weka.classifiers.meta.Bagging (RandomForest)
		11007	8806	2201	307	0.39	5.93	11.4	weka.classifiers.trees.RandomForest
	Descriptors/FPs Type	Unique records	Training Set Molecules	Validation Set Molecules	Number of descriptors / FPs used	R	MAE	RMSE	Technique Used
	AtomPairs2DFingerprinter	9773	7818	1955	780	0.24	6.35	12.24	weka.classifiers.meta.RandomSubSpace (RandomForest)
		9773	7818	1955	780	0.22	6.43	12.54	weka.classifiers.trees.RandomForest
		9773	7818	1955	780	0.22	6.42	12.55	weka.classifiers.meta.RandomCommittee (RandomForest)
		9773	7818	1955	780	0.22	6.39	12.41	weka.classifiers.meta.Bagging (RandomForest)
		9773	7818	1955	780	0.22	6.37	12.49	weka.classifiers.meta.RegressionByDiscretization (RandomForest)
	Descriptors/FPs Type	Unique records	Training Set Molecules	Validation Set Molecules	Number of descriptors / FPs used	R	MAE	RMSE	Technique Used
	AtomPairs2DFingerprintCount	10892	8714	2178	780	0.39	5.99	11.43	weka.classifiers.meta.RandomCommittee (RandomForest)
		10892	8714	2178	780	0.39	6	11.44	weka.classifiers.meta.RandomSubSpace (RandomForest)
		10892	8714	2178	780	0.38	6.03	11.46	weka.classifiers.meta.Bagging (RandomForest)
		10892	8714	2178	780	0.38	6.02	11.5	weka.classifiers.trees.RandomForest
		10892	8714	2178	780	0.38	6.14	11.83	weka.classifiers.meta.AdditiveRegression (RandomForest)
	Descriptors/FPs Type	Unique records	Training Set Molecules	Validation Set Molecules	Number of descriptors / FPs used	R	MAE	RMSE	Technique Used
	1D & 2D	10272	8218	2054	53	0.39	5.95	11.12	weka.classifiers.meta.RandomCommittee (RandomForest)
		10272	8218	2054	53	0.38	5.96	11.1	weka.classifiers.meta.Bagging (RandomForest)
		10272	8218	2054	53	0.38	5.96	11.17	weka.classifiers.trees.RandomForest
		10272	8218	2054	53	0.38	5.98	11.14	weka.classifiers.meta.RandomSubSpace (RandomForest)
		10272	8218	2054	53	0.37	6.08	11.55	weka.classifiers.meta.AdditiveRegression (RandomForest)
	Descriptors/FPs Type	Unique records	Training Set Molecules	Validation Set Molecules	Number of descriptors / FPs used	R	MAE	RMSE	Technique Used
	Fingerprinter	9335	7468	1867	25	0.24	6.08	12.7	weka.classifiers.functions.SMOreg (Puk)
		9335	7468	1867	25	0.24	6.39	12.24	weka.classifiers.functions.GaussianProcesses (Puk)
		9335	7468	1867	25	0.24	6.58	12.54	weka.classifiers.meta.RandomCommittee (RandomForest)
		9335	7468	1867	25	0.24	6.76	13.16	weka.classifiers.meta.AdditiveRegression (RandomForest)
		9335	7468	1867	25	0.23	6.36	12.81	weka.classifiers.lazy.KStar (Normalize over the attributes)
	Descriptors/FPs Type	Unique records	Training Set Molecules	Validation Set Molecules	Number of descriptors / FPs used	R	MAE	RMSE	Technique Used
	ExtendedFingerprinter	8205	6564	1641	23	0.23	6.8	12.9	weka.classifiers.trees.RandomForest
		8205	6564	1641	23	0.23	6.92	13.39	weka.classifiers.meta.AdditiveRegression (RandomForest)
		8205	6564	1641	23	0.23	6.64	12.62	weka.classifiers.functions.GaussianProcesses (Puk)
		8205	6564	1641	23	0.23	6.79	12.9	weka.classifiers.meta.RandomCommittee (RandomForest)
		8205	6564	1641	23	0.23	6	13.13	weka.classifiers.functions.SMOreg (Puk)
	Descriptors/FPs Type	Unique records	Training Set Molecules	Validation Set Molecules	Number of descriptors / FPs used	R	MAE	RMSE	Technique Used
	EStateFingerprinter	5760	4608	1152	17	0.07	6.95	12.77	weka.classifiers.functions.GaussianProcesses (RBFKernel)
		5760	4608	1152	17	0.06	6.95	12.79	weka.classifiers.functions.LinearRegression (M5 method)
		5760	4608	1152	17	0.06	6.95	12.79	weka.classifiers.functions.LinearRegression (Greedy method)
		5760	4608	1152	17	0.06	6.94	12.8	weka.classifiers.meta.Bagging (REPTree)
		5760	4608	1152	17	0.06	6.94	12.8	weka.classifiers.meta.AdditiveRegression (DecisionStump)
	Descriptors/FPs Type	Unique records	Training Set Molecules	Validation Set Molecules	Number of descriptors / FPs used	R	MAE	RMSE	Technique Used
	GraphOnlyFingerprinter	6698	5358	1340	51	0.16	6.67	12.44	weka.classifiers.meta.Bagging (REPTree)
		6698	5358	1340	51	0.15	6.7	12.44	weka.classifiers.meta.RandomSubSpace (RandomForest)
		6698	5358	1340	51	0.14	6.72	12.48	weka.classifiers.functions.GaussianProcesses (NormalizedPolyKernel)
		6698	5358	1340	51	0.14	6.72	12.52	weka.classifiers.meta.RandomSubSpace (RandomTree)
		6698	5358	1340	51	0.14	6.77	12.45	weka.classifiers.meta.RandomCommittee (REPTree)
	Descriptors/FPs Type	Unique records	Training Set Molecules	Validation Set Molecules	Number of descriptors / FPs used	R	MAE	RMSE	Technique Used
	MACCSFingerprinter	5714	4571	1143	6	0.13	6.92	12.72	weka.classifiers.meta.RandomSubSpace (RandomTree)
		5714	4571	1143	6	0.13	6.92	12.72	weka.classifiers.meta.RandomSubSpace (RandomForest)
		5714	4571	1143	6	0.13	6.88	12.71	weka.classifiers.meta.AdditiveRegression (DecisionStump)
		5714	4571	1143	6	0.13	6.88	12.71	weka.classifiers.functions.LinearRegression (No attribute selection)
		5714	4571	1143	6	0.13	6.72	12.72	weka.classifiers.functions.GaussianProcesses (PolyKernel)
	Descriptors/FPs Type	Unique records	Training Set Molecules	Validation Set Molecules	Number of descriptors / FPs used
	PubchemFingerprinter	5731	4585	1146	29	0.26	4.85	12.9	weka.classifiers.functions.SMOreg (Puk)
		5731	4585	1146	29	0.26	6.66	12.42	weka.classifiers.meta.AdditiveRegression (RandomTree)
		5731	4585	1146	29	0.25	6.7	12.41	weka.classifiers.functions.GaussianProcesses (Puk)
		5731	4585	1146	29	0.23	6.75	12.46	weka.classifiers.meta.Bagging (RandomTree)
		5731	4585	1146	29	0.23	6.7	12.54	weka.classifiers.meta.AdditiveRegression (RandomForest)
	Descriptors/FPs Type	Unique records	Training Set Molecules	Validation Set Molecules	Number of descriptors / FPs used
	SubstructureFingerprinter	5729	4583	1146	15	0.16	6.88	12.66	weka.classifiers.meta.RandomizableFilteredClassifier (LWL)
		5729	4583	1146	15	0.15	6.81	12.67	weka.classifiers.functions.GaussianProcesses (PolyKernel)
		5729	4583	1146	15	0.15	6.84	12.69	weka.classifiers.functions.LinearRegression (M5 method)
		5729	4583	1146	15	0.15	6.84	12.69	weka.classifiers.functions.LinearRegression (Greedy method)
		5729	4583	1146	15	0.15	6.84	12.7	weka.classifiers.meta.AdditiveRegression (DecisionStump)
	Descriptors/FPs Type	Unique records	Training Set Molecules	Validation Set Molecules	Number of descriptors / FPs used
	SubstructureFingerprintCount	5861	4689	1172	46	0.23	4.97	12.9	weka.classifiers.functions.SMOreg (Puk)
		5861	4689	1172	46	0.19	6.77	12.63	weka.classifiers.meta.AdditiveRegression (DecisionStump)
		5861	4689	1172	46	0.18	6.77	12.57	weka.classifiers.meta.RandomSubSpace (RandomForest)
		5861	4689	1172	46	0.18	6.76	12.86	weka.classifiers.meta.AdditiveRegression (RandomTree)
		5861	4689	1172	46	0.18	6.69	12.66	weka.classifiers.meta.Bagging (RandomForest)
	Descriptors/FPs Type	Unique records	Training Set Molecules	Validation Set Molecules	Number of descriptors / FPs used
	KlekotaRothFingerprinter	5819	4655	1164	116	0.3	6.85	12.27	weka.classifiers.functions.GaussianProcesses (PolyKernel)
		5819	4655	1164	116	0.29	6.47	12.24	weka.classifiers.functions.GaussianProcesses (Puk)
		5819	4655	1164	116	0.29	6.72	12.24	weka.classifiers.functions.GaussianProcesses (NormalizedPolyKernel)
		5819	4655	1164	116	0.29	6.46	12.6	weka.classifiers.trees.RandomTree
		5819	4655	1164	116	0.29	6.5	12.57	weka.classifiers.meta.AdditiveRegression (RandomForest)
	Descriptors/FPs Type	Unique records	Training Set Molecules	Validation Set Molecules	Number of descriptors / FPs used
	KlekotaRothFingerprintCount	6032	4826	1206	241	0.34	6.28	12.06	weka.classifiers.meta.RandomCommittee (RandomForest)
		6032	4826	1206	241	0.34	4.9	12.53	weka.classifiers.functions.SMOreg (Puk)
		6032	4826	1206	241	0.34	6.45	12.06	weka.classifiers.meta.RandomSubSpace (RandomForest)
		6032	4826	1206	241	0.34	6.28	12.07	weka.classifiers.trees.RandomForest
		6032	4826	1206	241	0.34	6.37	12.52	weka.classifiers.trees.RandomTree
	Descriptors/FPs Type	Unique records	Training Set Molecules	Validation Set Molecules	Number of descriptors / FPs used
	AtomPairs2DFingerprinter	5688	4550	1138	16	0.16	4.91	13.47	weka.classifiers.functions.SMOreg (RBFKernel)
		5688	4550	1138	16	0.13	7	12.83	weka.classifiers.meta.Bagging (RandomTree)
		5688	4550	1138	16	0.13	7	12.81	weka.classifiers.meta.RandomSubSpace (RandomForest)
		5688	4550	1138	16	0.13	6.99	12.84	weka.classifiers.meta.RegressionByDiscretization (RandomForest)
		5688	4550	1138	16	0.12	6.99	12.85	weka.classifiers.trees.RandomForest
	Descriptors/FPs Type	Unique records	Training Set Molecules	Validation Set Molecules	Number of descriptors / FPs used
	AtomPairs2DFingerprintCount	5964	4771	1193	64	0.22	6.7	12.62	weka.classifiers.lazy.KStar (Normalize over the attributes)
		5964	4771	1193	64	0.22	6.7	12.62	weka.classifiers.lazy.KStar (Average column entropy curves)
		5964	4771	1193	64	0.19	6.87	12.65	weka.classifiers.meta.RandomSubSpace (RandomTree)
		5964	4771	1193	64	0.19	6.85	12.89	weka.classifiers.trees.RandomTree
		5964	4771	1193	64	0.18	6.87	12.69	weka.classifiers.meta.RandomSubSpace (RandomForest)
