# Supplementary material for: ASCoVPred: a machine learning-based platform for quantitative prediction of anti-SARS-CoV-2 activity and human cell toxicity of molecules
Source: Research Square preprint supplement (doi:10.21203/rs.3.rs-967196/v1), 2021-10-13
Supplement: Supplementary file 8 [file 8dfa199ce56abb3323da09e2.xlsx]

## Sheet: Assay-14-ML-results
Table 1. Summary of whole descriptors/fingerprints-based datasets.
Sr.No.	Descriptors / FPs Type	Total number of descriptors / FPs	Unique records	Training set molecules	Validation set molecules	Maximum descriptors allowed	Model building status
1	1D & 2D	1444	9909	7927	1982	1585.4	yes
2	Fingerprinter	1024	10636	8509	2127	1701.8	yes
3	ExtendedFingerprinter	1024	10636	8509	2127	1701.8	yes
4	EStateFingerprinter	79	10549	8439	2110	1687.8	yes
5	GraphOnlyFingerprinter	1024	10633	8506	2127	1701.2	yes
6	MACCSFingerprinter	166	10627	8502	2125	1700.4	yes
7	PubchemFingerprinter	881	10625	8500	2125	1700	yes
8	SubstructureFingerprinter	307	10625	8500	2125	1700	yes
9	SubstructureFingerprintCount	307	10627	8502	2125	1700.4	yes
10	KlekotaRothFingerprinter	4860	10626	8501	2125	1700.2	no
11	KlekotaRothFingerprintCount	4860	10627	8502	2125	1700.4	no
12	AtomPairs2DFingerprinter	780	10419	8335	2084	1667	yes
13	AtomPairs2DFingerprintCount	780	10636	8509	2127	1701.8	yes
Table 2. Summary of selected descriptors/fingerprints-based datasets.
Sr.No.	Descriptors / FPs Type	Number of descriptors / FPs after feature selection	Unique records	Training set molecules	Validation set molecules	Maximum descriptors allowed	Model building status
1	1D & 2D	101	9909	7927	1982	1585.4	yes
2	Fingerprinter	25	10606	8485	2121	1697	yes
3	ExtendedFingerprinter	28	10629	8503	2126	1700.6	yes
4	EStateFingerprinter	16	9681	7745	1936	1549	yes
5	GraphOnlyFingerprinter	31	10212	8170	2042	1634	yes
6	MACCSFingerprinter	18	10319	8255	2064	1651	yes
7	PubchemFingerprinter	74	10420	8336	2084	1667.2	yes
8	SubstructureFingerprinter	33	8272	6618	1654	1323.6	yes
9	SubstructureFingerprintCount	48	9736	7789	1947	1557.8	yes
10	KlekotaRothFingerprinter	173	8475	6780	1695	1356	yes
11	KlekotaRothFingerprintCount	296	10063	8050	2013	1610	yes
12	AtomPairs2DFingerprinter	73	10120	8096	2024	1619.2	yes
13	AtomPairs2DFingerprintCount	81	9942	7954	1988	1590.8	yes
Table 3. Best five models performance with whole and selected descriptors/fingerprints-based datasets.
	Descriptors/FPs Type	Unique records	Training Set Molecules	Validation Set Molecules	Number of descriptors / FPs used	R	MAE	RMSE	Technique Used
	1D & 2D	9909	7927	1982	1444	0.5041	7.4282	14.5898	weka.classifiers.meta.RandomSubSpace (RandomForest)
		Validation dataset performance		1982	1444	0.4287	8.2264	14.8963
		9909	7927	1982	1444	0.5029	7.4283	14.6001	weka.classifiers.meta.RandomCommittee (RandomForest)
		9909	7927	1982	1444	0.5003	7.4578	14.6184	weka.classifiers.trees.RandomForest
		9909	7927	1982	1444	0.5001	7.3697	14.6856	weka.classifiers.meta.AdditiveRegression (RandomForest)
		9909	7927	1982	1444	0.4982	7.4285	14.6418	weka.classifiers.meta.RegressionByDiscretization (RandomForest)
	Descriptors/FPs Type	Unique records	Training Set Molecules	Validation Set Molecules	Number of descriptors / FPs used	R	MAE	RMSE	Technique Used
	Fingerprinter	10636	8509	2127	1024	0.4556	7.6045	15.13	weka.classifiers.functions.GaussianProcesses (Puk)
		10636	8509	2127	1024	0.4388	7.6977	15.4094	weka.classifiers.meta.RandomCommittee (RandomForest)
		10636	8509	2127	1024	0.4359	7.2402	15.6389	weka.classifiers.functions.SMOreg (Puk)
		10636	8509	2127	1024	0.4358	7.7514	15.4518	weka.classifiers.meta.RegressionByDiscretization (RandomForest)
		10636	8509	2127	1024	0.4349	7.7138	15.4629	weka.classifiers.trees.RandomForest
	Descriptors/FPs Type	Unique records	Training Set Molecules	Validation Set Molecules	Number of descriptors / FPs used	R	MAE	RMSE	Technique Used
	ExtendedFingerprinter	10636	8509	2127	1024	0.4912	7.4568	14.8532	weka.classifiers.functions.GaussianProcesses (RBFKernel)
		10636	8509	2127	1024	0.4901	7.1743	14.8853	weka.classifiers.functions.SMOreg (RBFKernel)
		10636	8509	2127	1024	0.4863	7.7232	14.8453	weka.classifiers.meta.RandomCommittee (RandomForest)
		10636	8509	2127	1024	0.4858	7.72	14.8491	weka.classifiers.meta.RandomSubSpace (RandomForest)
		10636	8509	2127	1024	0.4808	7.6289	15.045	weka.classifiers.meta.AdditiveRegression (RandomForest)
	Descriptors/FPs Type	Unique records	Training Set Molecules	Validation Set Molecules	Number of descriptors / FPs used	R	MAE	RMSE	Technique Used
	EStateFingerprinter	10549	8439	2110	79	0.3588	7.9035	15.8974	weka.classifiers.functions.GaussianProcesses (Puk)
		10549	8439	2110	79	0.3482	7.9589	16.2192	weka.classifiers.meta.RandomCommittee (RandomForest)
		10549	8439	2110	79	0.3454	8.0089	16.2465	weka.classifiers.meta.RegressionByDiscretization (RandomForest)
		10549	8439	2110	79	0.3444	7.9877	16.2586	weka.classifiers.trees.RandomForest
		10549	8439	2110	79	0.3404	8.0492	16.1454	weka.classifiers.meta.Bagging (RandomForest)
	Descriptors/FPs Type	Unique records	Training Set Molecules	Validation Set Molecules	Number of descriptors / FPs used	R	MAE	RMSE	Technique Used
	GraphOnlyFingerprinter	10633	8506	2127	1024	0.4833	7.5002	14.8636	weka.classifiers.meta.RandomSubSpace (RandomForest)
		10633	8506	2127	1024	0.4826	7.4963	15.1374	weka.classifiers.meta.AdditiveRegression (RandomForest)
		10633	8506	2127	1024	0.4806	7.5297	14.8972	weka.classifiers.meta.RandomCommittee (RandomForest)
		10633	8506	2127	1024	0.4736	7.5701	14.9749	weka.classifiers.trees.RandomForest
		10633	8506	2127	1024	0.4711	7.6245	14.9935	weka.classifiers.meta.RegressionByDiscretization (RandomForest)
	Descriptors/FPs Type	Unique records	Training Set Molecules	Validation Set Molecules	Number of descriptors / FPs used	R	MAE	RMSE	Technique Used
	MACCSFingerprinter	10627	8502	2125	166	0.4849	7.4115	14.838	weka.classifiers.meta.RandomSubSpace (RandomForest)
		10627	8502	2125	166	0.4826	7.4112	14.8578	weka.classifiers.meta.RandomCommittee (RandomForest)
		10627	8502	2125	166	0.4708	7.4802	14.9697	weka.classifiers.trees.RandomForest
		10627	8502	2125	166	0.4703	7.5955	14.9883	weka.classifiers.meta.Bagging (RandomForest)
		10627	8502	2125	166	0.4681	7.425	15.1869	weka.classifiers.meta.AdditiveRegression (RandomForest)
	Descriptors/FPs Type	Unique records	Training Set Molecules	Validation Set Molecules	Number of descriptors / FPs used	R	MAE	RMSE	Technique Used
	PubchemFingerprinter	10625	8500	2125	881	0.5014	7.2253	14.6783	weka.classifiers.meta.RandomCommittee (RandomForest)
		Validation dataset performance		2125	881	0.3856	8.371	15.8475
		10625	8500	2125	881	0.5	7.2468	14.6916	weka.classifiers.meta.RandomSubSpace (RandomForest)
		10625	8500	2125	881	0.4977	7.2354	14.7155	weka.classifiers.trees.RandomForest
		10625	8500	2125	881	0.4931	7.2937	14.7596	weka.classifiers.meta.RegressionByDiscretization (RandomForest)
		10625	8500	2125	881	0.49	7.3862	14.8064	weka.classifiers.meta.Bagging (RandomForest)
	Descriptors/FPs Type	Unique records	Training Set Molecules	Validation Set Molecules	Number of descriptors / FPs used	R	MAE	RMSE	Technique Used
	SubstructureFingerprinter	10625	8500	2125	307	0.4372	7.4921	15.3195	weka.classifiers.meta.RandomCommittee (RandomForest)
		10625	8500	2125	307	0.4345	7.6347	15.3186	weka.classifiers.functions.GaussianProcesses (Puk)
		10625	8500	2125	307	0.4333	7.512	15.3661	weka.classifiers.trees.RandomForest
		10625	8500	2125	307	0.4331	7.5735	15.2977	weka.classifiers.meta.Bagging (RandomForest)
		10625	8500	2125	307	0.4317	7.5509	15.3795	weka.classifiers.meta.RegressionByDiscretization (RandomForest)
	Descriptors/FPs Type	Unique records	Training Set Molecules	Validation Set Molecules	Number of descriptors / FPs used	R	MAE	RMSE	Technique Used
	SubstructureFingerprintCount	10627	8502	2125	307	0.4752	7.2526	14.926	weka.classifiers.meta.RandomCommittee (RandomForest)
		10627	8502	2125	307	0.4665	7.3217	15.0055	weka.classifiers.meta.RandomSubSpace (RandomForest)
		10627	8502	2125	307	0.4652	7.3213	15.0158	weka.classifiers.trees.RandomForest
		10627	8502	2125	307	0.463	7.3031	15.1925	weka.classifiers.meta.AdditiveRegression (RandomForest)
		10627	8502	2125	307	0.4622	7.4133	15.061	weka.classifiers.meta.Bagging (RandomForest)
	Descriptors/FPs Type	Unique records	Training Set Molecules	Validation Set Molecules	Number of descriptors / FPs used	R	MAE	RMSE	Technique Used
	AtomPairs2DFingerprinter	10419	8335	2084	780	0.4508	7.5205	15.2158	weka.classifiers.meta.RandomCommittee (RandomForest)
		10419	8335	2084	780	0.4444	7.2628	15.4049	weka.classifiers.functions.SMOreg (Puk)
		10419	8335	2084	780	0.4439	7.5597	15.5791	weka.classifiers.meta.AdditiveRegression (RandomForest)
		10419	8335	2084	780	0.4433	7.6017	15.2861	weka.classifiers.meta.RegressionByDiscretization (RandomForest)
		10419	8335	2084	780	0.4403	7.617	15.2813	weka.classifiers.meta.RandomSubSpace (RandomForest)
	Descriptors/FPs Type	Unique records	Training Set Molecules	Validation Set Molecules	Number of descriptors / FPs used	R	MAE	RMSE	Technique Used
	AtomPairs2DFingerprintCount	10636	8509	2127	780	0.4944	7.3107	14.7531	weka.classifiers.meta.RandomCommittee (RandomForest)
		10636	8509	2127	780	0.4943	7.3086	14.757	weka.classifiers.meta.RandomSubSpace (RandomForest)
		10636	8509	2127	780	0.4883	7.3459	14.8087	weka.classifiers.trees.RandomForest
		10636	8509	2127	780	0.4851	7.4347	14.839	weka.classifiers.meta.RegressionByDiscretization (RandomForest)
		10636	8509	2127	780	0.4833	7.3037	14.9931	weka.classifiers.meta.AdditiveRegression (RandomForest)
	Descriptors/FPs Type	Unique records	Training Set Molecules	Validation Set Molecules	Number of descriptors / FPs used	R	MAE	RMSE	Technique Used
	1D & 2D	9909	7927	1982	101	0.4963	7.4162	14.6597	weka.classifiers.meta.RandomSubSpace (RandomForest)
		9909	7927	1982	101	0.495	7.4141	14.6676	weka.classifiers.meta.RandomCommittee (RandomForest)
		9909	7927	1982	101	0.4933	7.3841	14.6834	weka.classifiers.meta.RegressionByDiscretization (RandomForest)
		9909	7927	1982	101	0.4875	7.4732	14.7335	weka.classifiers.trees.RandomForest
		9909	7927	1982	101	0.4856	7.255	14.8816	weka.classifiers.functions.SMOreg (Puk)
	Descriptors/FPs Type	Unique records	Training Set Molecules	Validation Set Molecules	Number of descriptors / FPs used	R	MAE	RMSE	Technique Used
	Fingerprinter	10606	8485	2121	25	0.4556	7.6045	15.13	weka.classifiers.functions.GaussianProcesses (Puk)
		10606	8485	2121	25	0.4388	7.6977	15.4094	weka.classifiers.meta.RandomCommittee (RandomForest)
		10606	8485	2121	25	0.4359	7.2402	15.6389	weka.classifiers.functions.SMOreg (Puk)
		10606	8485	2121	25	0.4358	7.7514	15.4518	weka.classifiers.meta.RegressionByDiscretization (RandomForest)
		10606	8485	2121	25	0.4349	7.7138	15.4629	weka.classifiers.trees.RandomForest
	Descriptors/FPs Type	Unique records	Training Set Molecules	Validation Set Molecules	Number of descriptors / FPs used	R	MAE	RMSE	Technique Used
	ExtendedFingerprinter	10629	8503	2126	28	0.419	7.6897	15.4157	weka.classifiers.functions.GaussianProcesses (Puk)
		10629	8503	2126	28	0.4146	7.7639	15.5594	weka.classifiers.meta.RandomCommittee (RandomForest)
		10629	8503	2126	28	0.4137	7.7839	15.5839	weka.classifiers.trees.RandomForest
		10629	8503	2126	28	0.4088	7.8792	15.5277	weka.classifiers.meta.Bagging (RandomForest)
		10629	8503	2126	28	0.4079	7.9133	15.6314	weka.classifiers.meta.RegressionByDiscretization (RandomForest)
	Descriptors/FPs Type	Unique records	Training Set Molecules	Validation Set Molecules	Number of descriptors / FPs used	R	MAE	RMSE	Technique Used
	EStateFingerprinter	9681	7745	1936	16	0.213	8.1736	16.3755	weka.classifiers.lazy.KStar (Normalize over the attributes)
		9681	7745	1936	16	0.213	8.1736	16.3755	weka.classifiers.lazy.KStar (Average column entropy curves)
		9681	7745	1936	16	0.211	8.362	16.3692	weka.classifiers.meta.Bagging (M5P)
		9681	7745	1936	16	0.205	8.3583	16.3953	weka.classifiers.meta.Bagging (REPTree)
		9681	7745	1936	16	0.2045	8.3393	16.3929	weka.classifiers.meta.AdditiveRegression (M5P)
	Descriptors/FPs Type	Unique records	Training Set Molecules	Validation Set Molecules	Number of descriptors / FPs used	R	MAE	RMSE	Technique Used
	GraphOnlyFingerprinter	10212	8170	2042	31	0.2896	8.3799	16.2196	weka.classifiers.lazy.KStar (Normalize over the attributes)
		10212	8170	2042	31	0.2896	8.3799	16.2196	weka.classifiers.lazy.KStar (Average column entropy curves)
		10212	8170	2042	31	0.2823	8.2861	16.2818	weka.classifiers.functions.GaussianProcesses (Puk)
		10212	8170	2042	31	0.2757	8.3556	16.3044	weka.classifiers.meta.RandomSubSpace (RandomForest)
		10212	8170	2042	31	0.2751	8.3374	16.4084	weka.classifiers.trees.RandomForest
	Descriptors/FPs Type	Unique records	Training Set Molecules	Validation Set Molecules	Number of descriptors / FPs used	R	MAE	RMSE	Technique Used
	MACCSFingerprinter	10319	8255	2064	18	0.3078	8.2341	16.1641	weka.classifiers.lazy.KStar (Normalize over the attributes)
		10319	8255	2064	18	0.3078	8.2341	16.1641	weka.classifiers.lazy.KStar (Average column entropy curves)
		10319	8255	2064	18	0.302	8.3104	16.2691	weka.classifiers.meta.RandomSubSpace (RandomForest)
		10319	8255	2064	18	0.3009	8.3132	16.275	weka.classifiers.meta.RandomSubSpace (RandomForest)
		10319	8255	2064	18	0.2986	8.2036	16.2315	weka.classifiers.meta.RandomizableFilteredClassifier (KStar)
	Descriptors/FPs Type	Unique records	Training Set Molecules	Validation Set Molecules	Number of descriptors / FPs used	R	MAE	RMSE	Technique Used
	PubchemFingerprinter	10420	8336	2084	74	0.3682	7.8121	15.9185	weka.classifiers.lazy.KStar (Normalize over the attributes)
		10420	8336	2084	74	0.3682	7.8121	15.9185	weka.classifiers.lazy.KStar (Average column entropy curves)
		10420	8336	2084	74	0.3529	8.0185	15.9694	weka.classifiers.functions.GaussianProcesses (Puk)
		10420	8336	2084	74	0.3495	8.0984	15.9741	weka.classifiers.meta.RandomSubSpace (RandomForest)
		10420	8336	2084	74	0.3461	8.0704	15.9773	weka.classifiers.meta.RandomSubSpace (RandomForest)
	Descriptors/FPs Type	Unique records	Training Set Molecules	Validation Set Molecules	Number of descriptors / FPs used	R	MAE	RMSE	Technique Used
	SubstructureFingerprinter	8272	6618	1654	33	0.2731	8.1558	16.2675	weka.classifiers.functions.GaussianProcesses (Puk)
		8272	6618	1654	33	0.2718	8.1427	16.29	weka.classifiers.meta.RandomCommittee (RandomForest)
		8272	6618	1654	33	0.2712	8.29	16.378	weka.classifiers.meta.RandomSubSpace (RandomForest)
		8272	6618	1654	33	0.2705	8.2921	16.3881	weka.classifiers.meta.RandomSubSpace (RandomForest)
		8272	6618	1654	33	0.2702	8.1525	16.3013	weka.classifiers.trees.RandomForest
	Descriptors/FPs Type	Unique records	Training Set Molecules	Validation Set Molecules	Number of descriptors / FPs used	R	MAE	RMSE	Technique Used
	SubstructureFingerprintCount	9736	7789	1947	48	0.3003	8.2089	15.9699	weka.classifiers.lazy.KStar (Normalize over the attributes)
		9736	7789	1947	48	0.3003	8.2089	15.9699	weka.classifiers.lazy.KStar (Average column entropy curves)
		9736	7789	1947	48	0.2949	8.1104	15.9852	weka.classifiers.functions.GaussianProcesses (Puk)
		9736	7789	1947	48	0.2902	8.1195	16.0531	weka.classifiers.meta.RandomCommittee (RandomForest)
		9736	7789	1947	48	0.2891	8.123	16.0598	weka.classifiers.trees.RandomForest
	Descriptors/FPs Type	Unique records	Training Set Molecules	Validation Set Molecules	Number of descriptors / FPs used	R	MAE	RMSE	Technique Used
	KlekotaRothFingerprinter	8475	6780	1695	173	0.3381	7.6702	15.8015	weka.classifiers.functions.GaussianProcesses (Puk)
		8475	6780	1695	173	0.3142	7.5962	16.0433	weka.classifiers.meta.RegressionByDiscretization (RandomForest)
		8475	6780	1695	173	0.3103	7.4801	16.034	weka.classifiers.meta.RandomizableFilteredClassifier (KStar)
		8475	6780	1695	173	0.3089	7.6306	16.0947	weka.classifiers.meta.RandomCommittee (RandomForest)
		8475	6780	1695	173	0.3066	7.6375	16.1168	weka.classifiers.trees.RandomForest
	Descriptors/FPs Type	Unique records	Training Set Molecules	Validation Set Molecules	Number of descriptors / FPs used	R	MAE	RMSE	Technique Used
	KlekotaRothFingerprintCount	10063	8050	2013	296	0.3255	7.7201	16.0683	weka.classifiers.meta.RegressionByDiscretization (RandomForest)
		10063	8050	2013	296	0.32	7.7443	16.1211	weka.classifiers.meta.RandomCommittee (RandomForest)
		10063	8050	2013	296	0.3188	7.7444	16.1329	weka.classifiers.trees.RandomForest
		10063	8050	2013	296	0.3187	7.6658	16.0276	weka.classifiers.meta.RandomizableFilteredClassifier (KStar)
		10063	8050	2013	296	0.3183	7.747	16.369	weka.classifiers.meta.RandomCommittee (RandomForest)
	Descriptors/FPs Type	Unique records	Training Set Molecules	Validation Set Molecules	Number of descriptors / FPs used	R	MAE	RMSE	Technique Used
	AtomPairs2DFingerprinter	10120	8096	2024	73	0.2715	8.2464	16.3435	weka.classifiers.lazy.KStar (Normalize over the attributes)
		10120	8096	2024	73	0.2715	8.2464	16.3435	weka.classifiers.lazy.KStar (Average column entropy curves)
		10120	8096	2024	73	0.271	8.2132	16.3842	weka.classifiers.meta.RandomizableFilteredClassifier (KStar)
		10120	8096	2024	73	0.2708	8.2707	16.4219	weka.classifiers.meta.RegressionByDiscretization (RandomForest)
		10120	8096	2024	73	0.2696	8.2482	16.3181	weka.classifiers.functions.GaussianProcesses (Puk)
	Descriptors/FPs Type	Unique records	Training Set Molecules	Validation Set Molecules	Number of descriptors / FPs used	R	MAE	RMSE	Technique Used
	AtomPairs2DFingerprintCount	9942	7954	1988	81	0.2489	8.2373	16.4873	weka.classifiers.meta.RandomCommittee (RandomForest)
		9942	7954	1988	81	0.2483	8.2481	16.4948	weka.classifiers.meta.RegressionByDiscretization (RandomForest)
		9942	7954	1988	81	0.2474	8.2492	16.5025	weka.classifiers.trees.RandomForest
		9942	7954	1988	81	0.2471	8.2786	16.6636	weka.classifiers.meta.AdditiveRegression (RandomForest)
		9942	7954	1988	81	0.2415	8.1729	16.412	weka.classifiers.lazy.KStar (Normalize over the attributes)
