# Supplementary material for: ASCoVPred: a machine learning-based platform for quantitative prediction of anti-SARS-CoV-2 activity and human cell toxicity of molecules
Source: Research Square preprint supplement (doi:10.21203/rs.3.rs-967196/v1), 2021-10-13
Supplement: Supplementary file 9 [file 9f71a2d7010e2e54fdc960b2.xlsx]

## Sheet: Assay-20-ML-results
Table 1. Summary of whole descriptors/fingerprints-based datasets.
Sr.No.	Descriptors / FPs Type	Total number of descriptors / FPs	Unique records	Training set molecules	Validation set molecules	Maximum descriptors allowed	Model building status
1	1D & 2D	1444	N/A	N/A	N/A	N/A	N/A
2	Fingerprinter	1024	9687	7750	1937	1550	Yes
3	ExtendedFingerprinter	1024	9694	7755	1939	1551	Yes
4	EStateFingerprinter	79	9151	7321	1830	1464.2	Yes
5	GraphOnlyFingerprinter	1024	9598	7678	1920	1535.6	Yes
6	MACCSFingerprinter	166	9651	7721	1930	1544.2	Yes
7	PubchemFingerprinter	881	9678	7742	1936	1548.4	Yes
8	SubstructureFingerprinter	307	9578	7662	1916	1532.4	Yes
9	SubstructureFingerprintCount	307	9694	7755	1939	1551	Yes
10	KlekotaRothFingerprinter	4860	9695	7756	1939	1551.2	No
11	KlekotaRothFingerprintCount	4860	9698	7758	1940	1551.6	No
12	AtomPairs2DFingerprinter	780	9334	7467	1867	1493.4	Yes
13	AtomPairs2DFingerprintCount	780	9680	7744	1936	1548.8	Yes
Table 2. Summary of selected descriptors/fingerprints-based datasets.
Sr.No.	Descriptors / FPs Type	Number of descriptors / FPs after feature selection	Unique records	Training set molecules	Validation set molecules	Maximum descriptors allowed	Model building status
1	1D & 2D	N/A	N/A	N/A	N/A	N/A	N/A
2	Fingerprinter	33	9372	7498	1874	1499.6	Yes
3	ExtendedFingerprinter	40	9476	7581	1895	1516.2	Yes
4	EStateFingerprinter	18	8316	6653	1663	1330.6	Yes
5	GraphOnlyFingerprinter	33	8635	6908	1727	1381.6	Yes
6	MACCSFingerprinter	21	8594	6875	1719	1375	Yes
7	PubchemFingerprinter	72	8501	6801	1700	1360.2	Yes
8	SubstructureFingerprinter	49	8288	6630	1658	1326	Yes
9	SubstructureFingerprintCount	79	9138	7310	1828	1462	Yes
10	KlekotaRothFingerprinter	512	8748	6998	1750	1399.6	Yes
11	KlekotaRothFingerprintCount	531	8749	6999	1750	1399.8	Yes
12	AtomPairs2DFingerprinter	48	8213	6570	1643	1314	Yes
13	AtomPairs2DFingerprintCount	94	8608	6886	1722	1377.2	Yes
Table 3. Best five models performance with whole and selected descriptors/fingerprints-based datasets.
	Descriptors/FPs Type	Unique records	Training Set Molecules	Validation Set Molecules	Number of descriptors / FPs used	R	MAE	RMSE	Technique Used
	Fingerprinter	9687	7750	1937	1024	0.64	28.52	35.3	weka.classifiers.functions.GaussianProcesses (RBFKernel)
		9687	7750	1937	1024	0.63	26.74	35.82	weka.classifiers.functions.SMOreg (RBFKernel)
		9687	7750	1937	1024	0.62	28.48	35.63	weka.classifiers.meta.RandomCommittee (RandomForest)
		9687	7750	1937	1024	0.62	28.53	35.66	weka.classifiers.meta.RandomSubSpace (RandomForest)
		9687	7750	1937	1024	0.62	29.34	35.91	weka.classifiers.meta.Bagging (RandomForest)
	Descriptors/FPs Type	Unique records	Training Set Molecules	Validation Set Molecules	Number of descriptors / FPs used	R	MAE	RMSE	Technique Used
	ExtendedFingerprinter	9694	7755	1939	1024	0.64	28.34	35.14	weka.classifiers.functions.GaussianProcesses (RBFKernel)
		9694	7755	1939	1024	0.63	26.53	35.54	weka.classifiers.functions.SMOreg (RBFKernel)
		9694	7755	1939	1024	0.63	28.38	35.49	weka.classifiers.meta.RandomCommittee (RandomForest)
		9694	7755	1939	1024	0.63	28.46	35.56	weka.classifiers.meta.RandomSubSpace (RandomForest)
		9694	7755	1939	1024	0.62	29.35	35.86	weka.classifiers.meta.Bagging (RandomForest)
	Descriptors/FPs Type	Unique records	Training Set Molecules	Validation Set Molecules	Number of descriptors / FPs used	R	MAE	RMSE	Technique Used
	EStateFingerprinter	9151	7321	1830	79	0.51	32.29	39.2	weka.classifiers.functions.GaussianProcesses (Puk)
		9151	7321	1830	79	0.51	31.23	39.49	weka.classifiers.meta.RandomCommittee (RandomForest)
		9151	7321	1830	79	0.51	31.71	39.35	weka.classifiers.meta.Bagging (RandomForest)
		9151	7321	1830	79	0.5	31.24	39.57	weka.classifiers.trees.RandomForest
		9151	7321	1830	79	0.5	31.37	39.61	weka.classifiers.meta.RegressionByDiscretization (RandomForest)
	Descriptors/FPs Type	Unique records	Training Set Molecules	Validation Set Molecules	Number of descriptors / FPs used	R	MAE	RMSE	Technique Used
	GraphOnlyFingerprinter	9598	7678	1920	1024	0.6	28.86	36.33	weka.classifiers.meta.RandomSubSpace (RandomForest)
		9598	7678	1920	1024	0.6	28.75	36.39	weka.classifiers.meta.RandomCommittee (RandomForest)
		9598	7678	1920	1024	0.59	29.54	36.62	weka.classifiers.meta.Bagging (RandomForest)
		9598	7678	1920	1024	0.59	29.02	36.62	weka.classifiers.meta.RegressionByDiscretization (RandomForest)
		9598	7678	1920	1024	0.59	28.88	36.63	weka.classifiers.trees.RandomForest
	Descriptors/FPs Type	Unique records	Training Set Molecules	Validation Set Molecules	Number of descriptors / FPs used	R	MAE	RMSE	Technique Used
	MACCSFingerprinter	9651	7721	1930	166	0.63	27.94	35.33	weka.classifiers.meta.RandomCommittee (RandomForest)
		9651	7721	1930	166	0.63	28.71	35.57	weka.classifiers.meta.Bagging (RandomForest)
		9651	7721	1930	166	0.63	28.25	35.48	weka.classifiers.meta.RandomSubSpace (RandomForest)
		9651	7721	1930	166	0.63	27.99	35.5	weka.classifiers.trees.RandomForest
		9651	7721	1930	166	0.62	28.33	35.66	weka.classifiers.meta.RegressionByDiscretization (RandomForest)
	Descriptors/FPs Type	Unique records	Training Set Molecules	Validation Set Molecules	Number of descriptors / FPs used	R	MAE	RMSE	Technique Used
	PubchemFingerprinter	9678	7742	1936	881	0.64	27.19	35.01	weka.classifiers.meta.RandomSubSpace (RandomForest)
		9678	7742	1936	881	0.64	27.17	35.03	weka.classifiers.meta.RandomCommittee (RandomForest)
		9678	7742	1936	881	0.64	27.94	35.22	weka.classifiers.meta.Bagging (RandomForest)
		9678	7742	1936	881	0.63	27.28	35.25	weka.classifiers.trees.RandomForest
		9678	7742	1936	881	0.63	27.47	35.33	weka.classifiers.meta.RegressionByDiscretization (RandomForest)
	Descriptors/FPs Type	Unique records	Training Set Molecules	Validation Set Molecules	Number of descriptors / FPs used	R	MAE	RMSE	Technique Used
	SubstructureFingerprinter	9578	7662	1916	307	0.59	28.68	36.9	weka.classifiers.meta.RandomCommittee (RandomForest)
		9578	7662	1916	307	0.58	28.74	37.03	weka.classifiers.trees.RandomForest
		9578	7662	1916	307	0.58	29.43	36.99	weka.classifiers.meta.Bagging (RandomForest)
		9578	7662	1916	307	0.58	28.86	37.08	weka.classifiers.meta.RegressionByDiscretization (RandomForest)
		9578	7662	1916	307	0.57	31.11	37.47	weka.classifiers.functions.GaussianProcesses (Puk)
	Descriptors/FPs Type	Unique records	Training Set Molecules	Validation Set Molecules	Number of descriptors / FPs used	R	MAE	RMSE	Technique Used
	SubstructureFingerprintCount	9694	7755	1939	307	0.66	26.68	34.16	weka.classifiers.meta.RandomCommittee (RandomForest)
	Deployed on Webserver	Validation dataset performance		1939	307	0.68	26.41	33.87
		9694	7755	1939	307	0.66	26.74	34.28	weka.classifiers.trees.RandomForest
		9694	7755	1939	307	0.66	27.49	34.48	weka.classifiers.meta.Bagging (RandomForest)
		9694	7755	1939	307	0.65	27.23	34.49	weka.classifiers.meta.RandomSubSpace (RandomForest)
		9694	7755	1939	307	0.65	27.09	34.48	weka.classifiers.meta.RegressionByDiscretization (RandomForest)
	Descriptors/FPs Type	Unique records	Training Set Molecules	Validation Set Molecules	Number of descriptors / FPs used	R	MAE	RMSE	Technique Used
	AtomPairs2DFingerprinter	9334	7467	1867	780	0.54	31.06	38.21	weka.classifiers.meta.RandomSubSpace (RandomForest)
		9334	7467	1867	780	0.54	30.33	38.31	weka.classifiers.meta.RandomCommittee (RandomForest)
		9334	7467	1867	780	0.54	31.03	38.41	weka.classifiers.meta.Bagging (RandomForest)
		9334	7467	1867	780	0.54	30.45	38.49	weka.classifiers.trees.RandomForest
		9334	7467	1867	780	0.53	30.49	38.5	weka.classifiers.meta.RegressionByDiscretization (RandomForest)
	Descriptors/FPs Type	Unique records	Training Set Molecules	Validation Set Molecules	Number of descriptors / FPs used	R	MAE	RMSE	Technique Used
	AtomPairs2DFingerprintCount	9680	7744	1936	780	0.63	27.82	35.49	weka.classifiers.meta.RandomCommittee (RandomForest)
		9680	7744	1936	780	0.62	27.95	35.58	weka.classifiers.meta.RandomSubSpace (RandomForest)
		9680	7744	1936	780	0.62	28.66	35.8	weka.classifiers.meta.Bagging (RandomForest)
		9680	7744	1936	780	0.62	27.93	35.72	weka.classifiers.trees.RandomForest
		9680	7744	1936	780	0.62	28.15	35.75	weka.classifiers.meta.RegressionByDiscretization (RandomForest)
	Descriptors/FPs Type	Unique records	Training Set Molecules	Validation Set Molecules	Number of descriptors / FPs used	R	MAE	RMSE	Technique Used
	Fingerprinter	9372	7498	1874	33	0.58	29.97	36.99	weka.classifiers.functions.GaussianProcesses (Puk)
		9372	7498	1874	33	0.58	28.78	37.04	weka.classifiers.meta.RandomCommittee (RandomForest)
		9372	7498	1874	33	0.58	28.83	37.17	weka.classifiers.trees.RandomForest
		9372	7498	1874	33	0.58	28.95	37.17	weka.classifiers.meta.RegressionByDiscretization (RandomForest)
		9372	7498	1874	33	0.58	29.41	37.11	weka.classifiers.meta.Bagging (RandomForest)
	Descriptors/FPs Type	Unique records	Training Set Molecules	Validation Set Molecules	Number of descriptors / FPs used	R	MAE	RMSE	Technique Used
	ExtendedFingerprinter	9476	7581	1895	40	0.61	27.84	35.95	weka.classifiers.meta.RandomCommittee (RandomForest)
		9476	7581	1895	40	0.61	27.97	36.04	weka.classifiers.meta.RegressionByDiscretization (RandomForest)
		9476	7581	1895	40	0.61	28.51	36.08	weka.classifiers.meta.Bagging (RandomForest)
		9476	7581	1895	40	0.61	27.95	36.16	weka.classifiers.trees.RandomForest
		9476	7581	1895	40	0.6	29.02	36.28	weka.classifiers.meta.RandomSubSpace (RandomForest)
	Descriptors/FPs Type	Unique records	Training Set Molecules	Validation Set Molecules	Number of descriptors / FPs used	R	MAE	RMSE	Technique Used
	EStateFingerprinter	8316	6653	1663	18	0.39	35.96	41.88	weka.classifiers.lazy.KStar (Normalize over the attributes)
		8316	6653	1663	18	0.39	35.96	41.88	weka.classifiers.lazy.KStar (Average column entropy curves)
		8316	6653	1663	18	0.39	35.83	41.89	weka.classifiers.meta.RandomCommittee (REPTree)
		8316	6653	1663	18	0.39	35.78	41.93	weka.classifiers.meta.Bagging (REPTree)
		8316	6653	1663	18	0.38	35.62	42.04	weka.classifiers.functions.GaussianProcesses (Puk)
	Descriptors/FPs Type	Unique records	Training Set Molecules	Validation Set Molecules	Number of descriptors / FPs used	R	MAE	RMSE	Technique Used
	GraphOnlyFingerprinter	8635	6908	1727	33	0.49	32.49	39.72	weka.classifiers.functions.GaussianProcesses (Puk)
		8635	6908	1727	33	0.48	32.81	39.78	weka.classifiers.lazy.KStar (Normalize over the attributes)
		8635	6908	1727	33	0.48	32.81	39.78	weka.classifiers.lazy.KStar (Average column entropy curves)
		8635	6908	1727	33	0.48	34.12	40.03	weka.classifiers.meta.RandomSubSpace (RandomForest)
		8635	6908	1727	33	0.48	32.25	40.07	weka.classifiers.meta.Bagging (RandomForest)
	Descriptors/FPs Type	Unique records	Training Set Molecules	Validation Set Molecules	Number of descriptors / FPs used	R	MAE	RMSE	Technique Used
	MACCSFingerprinter	8594	6875	1719	21	0.51	32.19	39.19	weka.classifiers.lazy.KStar (Normalize over the attributes)
		8594	6875	1719	21	0.51	32.19	39.19	weka.classifiers.lazy.KStar (Average column entropy curves)
		8594	6875	1719	21	0.5	31.5	39.33	weka.classifiers.functions.GaussianProcesses (Puk)
		8594	6875	1719	21	0.5	31.87	39.41	weka.classifiers.meta.Bagging (REPTree)
		8594	6875	1719	21	0.5	32.11	39.42	weka.classifiers.meta.RandomCommittee (REPTree)
	Descriptors/FPs Type	Unique records	Training Set Molecules	Validation Set Molecules	Number of descriptors / FPs used	R	MAE	RMSE	Technique Used
	PubchemFingerprinter	8501	6801	1700	72	0.53	31.26	38.58	weka.classifiers.lazy.KStar (Normalize over the attributes)
		8501	6801	1700	72	0.53	31.26	38.58	weka.classifiers.lazy.KStar (Average column entropy curves)
		8501	6801	1700	72	0.52	33.08	39.04	weka.classifiers.meta.RandomSubSpace (RandomForest)
		8501	6801	1700	72	0.52	33	39.02	weka.classifiers.meta.RandomSubSpace (RandomTree)
		8501	6801	1700	72	0.52	31.29	38.85	weka.classifiers.functions.GaussianProcesses (Puk)
	Descriptors/FPs Type	Unique records	Training Set Molecules	Validation Set Molecules	Number of descriptors / FPs used	R	MAE	RMSE	Technique Used
	SubstructureFingerprinter	8288	6630	1658	49	0.44	34.25	40.81	weka.classifiers.functions.GaussianProcesses (NormalizedPolyKernel)
		8288	6630	1658	49	0.43	34.34	40.94	weka.classifiers.functions.GaussianProcesses (Puk)
		8288	6630	1658	49	0.43	34.64	40.97	weka.classifiers.functions.LinearRegression (No attribute selection)
		8288	6630	1658	49	0.43	34.77	41.02	weka.classifiers.functions.GaussianProcesses (PolyKernel)
		8288	6630	1658	49	0.43	34.55	41.05	weka.classifiers.meta.Bagging (REPTree)
	Descriptors/FPs Type	Unique records	Training Set Molecules	Validation Set Molecules	Number of descriptors / FPs used	R	MAE	RMSE	Technique Used
	SubstructureFingerprintCount	9138	7310	1828	79	0.56	29.73	37.69	weka.classifiers.lazy.KStar (Normalize over the attributes)
		9138	7310	1828	79	0.56	29.73	37.69	weka.classifiers.lazy.KStar (Average column entropy curves)
		9138	7310	1828	79	0.56	29.37	37.82	weka.classifiers.meta.Bagging (RandomForest)
		9138	7310	1828	79	0.56	29.07	38.05	weka.classifiers.meta.RandomCommittee (RandomForest)
		9138	7310	1828	79	0.56	29.12	38.13	weka.classifiers.trees.RandomForest
	Descriptors/FPs Type	Unique records	Training Set Molecules	Validation Set Molecules	Number of descriptors / FPs used	R	MAE	RMSE	Technique Used
	KlekotaRothFingerprinter	8748	6998	1750	512	0.54	31.07	38.18	weka.classifiers.functions.GaussianProcesses (NormalizedPolyKernel)
		8748	6998	1750	512	0.54	32.55	38.56	weka.classifiers.meta.RandomSubSpace (RandomForest)
		8748	6998	1750	512	0.54	31.39	38.35	weka.classifiers.functions.GaussianProcesses (Puk)
		8748	6998	1750	512	0.53	32.29	38.53	weka.classifiers.meta.RandomSubSpace (RandomTree)
		8748	6998	1750	512	0.53	30.34	38.46	weka.classifiers.meta.RandomCommittee (RandomForest)
	Descriptors/FPs Type	Unique records	Training Set Molecules	Validation Set Molecules	Number of descriptors / FPs used	R	MAE	RMSE	Technique Used
	KlekotaRothFingerprintCount	8749	6999	1750	531	0.53	32.98	38.77	weka.classifiers.meta.RandomSubSpace (RandomForest)
		8749	6999	1750	531	0.53	32.74	38.71	weka.classifiers.meta.RandomSubSpace (RandomTree)
		8749	6999	1750	531	0.53	31.83	38.62	weka.classifiers.functions.GaussianProcesses (Puk)
		8749	6999	1750	531	0.53	31.83	38.64	weka.classifiers.functions.GaussianProcesses (NormalizedPolyKernel)
		8749	6999	1750	531	0.52	32.68	38.77	weka.classifiers.functions.GaussianProcesses (PolyKernel)
	Descriptors/FPs Type	Unique records	Training Set Molecules	Validation Set Molecules	Number of descriptors / FPs used	R	MAE	RMSE	Technique Used
	AtomPairs2DFingerprinter	8213	6570	1643	48	0.41	35.36	41.42	weka.classifiers.lazy.KStar (Normalize over the attributes)
		8213	6570	1643	48	0.41	35.36	41.42	weka.classifiers.lazy.KStar (Average column entropy curves)
		8213	6570	1643	48	0.41	36.53	41.71	weka.classifiers.meta.RandomSubSpace (RandomForest)
		8213	6570	1643	48	0.41	35.07	41.45	weka.classifiers.functions.GaussianProcesses (Puk)
		8213	6570	1643	48	0.41	36.52	41.71	weka.classifiers.meta.RandomSubSpace (RandomTree)
	Descriptors/FPs Type	Unique records	Training Set Molecules	Validation Set Molecules	Number of descriptors / FPs used	R	MAE	RMSE	Technique Used
	AtomPairs2DFingerprintCount	8608	6886	1722	94	0.43	35.39	41.12	weka.classifiers.meta.RandomSubSpace (RandomForest)
		8608	6886	1722	94	0.43	33.74	41.36	weka.classifiers.meta.RandomCommittee (RandomForest)
		8608	6886	1722	94	0.43	34.71	41.08	weka.classifiers.meta.Bagging (REPTree)
		8608	6886	1722	94	0.43	33.82	41.47	weka.classifiers.trees.RandomForest
		8608	6886	1722	94	0.43	34.71	41.16	weka.classifiers.lazy.KStar (Normalize over the attributes)
