# Supplementary material for: ASCoVPred: a machine learning-based platform for quantitative prediction of anti-SARS-CoV-2 activity and human cell toxicity of molecules
Source: Research Square preprint supplement (doi:10.21203/rs.3.rs-967196/v1), 2021-10-13
Supplement: Supplementary file 11 [file c296a038f3785ecfb8d4dd80.xlsx]

## Sheet: Assay-21-ML-results
Table 1. Summary of whole descriptors/fingerprints-based datasets.
Sr.No.	Descriptors / FPs Type	Total number of descriptors / FPs	Unique records	Training set molecules	Validation set molecules	Maximum descriptors allowed	Model building status
1	1D & 2D	1444	4491	3593	898	718.6	No
2	Fingerprinter	1024	4694	3755	939	751	No
3	ExtendedFingerprinter	1024	4694	3755	939	751	No
4	EStateFingerprinter	79	4692	3754	938	750.8	Yes
5	GraphOnlyFingerprinter	1024	4694	3755	939	751	No
6	MACCSFingerprinter	166	4692	3754	938	750.8	Yes
7	PubchemFingerprinter	881	4692	3754	938	750.8	No
8	SubstructureFingerprinter	307	4692	3754	938	750.8	Yes
9	SubstructureFingerprintCount	307	4692	3754	938	750.8	Yes
10	KlekotaRothFingerprinter	4860	4692	3754	938	750.8	No
11	KlekotaRothFingerprintCount	4860	4692	3754	938	750.8	No
12	AtomPairs2DFingerprinter	780	4694	3755	939	751	No
13	AtomPairs2DFingerprintCount	780	4694	3755	939	751	No
Table 2. Summary of selected descriptors/fingerprints-based datasets.
Sr.No.	Descriptors / FPs Type	Number of descriptors / FPs after feature selection	Unique records	Training set molecules	Validation set molecules	Maximum descriptors allowed	Model building status
1	1D & 2D	45	4491	3593	898	718.6	yes
2	Fingerprinter	46	4694	3755	939	751	yes
3	ExtendedFingerprinter	45	4694	3755	939	751	yes
4	EStateFingerprinter	12	4691	3753	938	750.6	yes
5	GraphOnlyFingerprinter	37	4693	3754	939	750.8	yes
6	MACCSFingerprinter	19	4692	3754	938	750.8	yes
7	PubchemFingerprinter	64	4692	3754	938	750.8	yes
8	SubstructureFingerprinter	36	4689	3751	938	750.2	yes
9	SubstructureFingerprintCount	72	4692	3754	938	750.8	yes
10	KlekotaRothFingerprinter	318	4687	3750	937	750	yes
11	KlekotaRothFingerprintCount	393	4686	3749	937	749.8	yes
12	AtomPairs2DFingerprinter	69	4694	3755	939	751	yes
13	AtomPairs2DFingerprintCount	109	4694	3755	939	751	yes
Table 3. Best five models performance with whole and selected descriptors/fingerprints-based datasets.
	Descriptors/FPs Type	Unique records	Training Set Molecules	Validation Set Molecules	Number of descriptors / FPs used	R	MAE	RMSE	Technique Used
	EStateFingerprinter	4692	3754	938	79	0.3182	13.3272	21.0399	weka.classifiers.functions.GaussianProcesses (Puk)
		4692	3754	938	79	0.3052	13.7735	21.6668	weka.classifiers.meta.RandomCommittee (RandomForest)
		4692	3754	938	79	0.2985	13.8271	21.7703	weka.classifiers.trees.RandomForest
		4692	3754	938	79	0.2935	13.4579	21.1513	weka.classifiers.meta.RandomSubSpace (RandomForest)
		4692	3754	938	79	0.2929	13.6997	21.5547	weka.classifiers.meta.Bagging (RandomForest)
	Descriptors/FPs Type	Unique records	Training Set Molecules	Validation Set Molecules	Number of descriptors / FPs used	R	MAE	RMSE	Technique Used
	MACCSFingerprinter	4692	3754	938	166	0.4072	12.7876	20.2317	weka.classifiers.meta.RandomCommittee (RandomForest)
		4692	3754	938	166	0.4065	12.8099	20.2502	weka.classifiers.trees.RandomForest
		4692	3754	938	166	0.3997	12.8194	20.2966	weka.classifiers.meta.RandomSubSpace (RandomForest)
		4692	3754	938	166	0.3977	12.8459	20.2959	weka.classifiers.meta.Bagging (RandomForest)
		4692	3754	938	166	0.3951	12.8095	20.3349	weka.classifiers.meta.RegressionByDiscretization (RandomForest)
	Descriptors/FPs Type	Unique records	Training Set Molecules	Validation Set Molecules	Number of descriptors / FPs used	R	MAE	RMSE	Technique Used
	SubstructureFingerprinter	4692	3754	938	307	0.3682	12.9861	20.7476	weka.classifiers.meta.RandomCommittee (RandomForest)
		4692	3754	938	307	0.3629	12.9511	20.6745	weka.classifiers.meta.Bagging (RandomForest)
		4692	3754	938	307	0.3626	12.9536	20.6337	weka.classifiers.meta.RandomSubSpace (RandomForest)
		4692	3754	938	307	0.3605	13.0517	20.853	weka.classifiers.trees.RandomForest
		4692	3754	938	307	0.3472	13.0944	20.9378	weka.classifiers.meta.RegressionByDiscretization (RandomForest)
	Descriptors/FPs Type	Unique records	Training Set Molecules	Validation Set Molecules	Number of descriptors / FPs used	R	MAE	RMSE	Technique Used
	SubstructureFingerprintCount	4692	3754	938	307	0.4077	12.7147	20.2371	weka.classifiers.meta.RandomCommittee (RandomForest)
		4692	3754	938	307	0.4012	12.753	20.2866	weka.classifiers.meta.RandomSubSpace (RandomForest)
		4692	3754	938	307	0.3995	12.7949	20.2788	weka.classifiers.functions.GaussianProcesses (Puk)
		4692	3754	938	307	0.3957	12.84	20.3875	weka.classifiers.trees.RandomForest
		4692	3754	938	307	0.3954	12.7849	20.3235	weka.classifiers.meta.Bagging (RandomForest)
	Descriptors/FPs Type	Unique records	Training Set Molecules	Validation Set Molecules	Number of descriptors / FPs used	R	MAE	RMSE	Technique Used
	1D & 2D	4491	3593	898	45	0.4297	12.6092	19.6881	weka.classifiers.meta.RandomCommittee (RandomForest)
		Validation dataset performance		898	45	0.5146	11.9948	18.6278
		4491	3593	898	45	0.4249	12.6662	19.7344	weka.classifiers.meta.Bagging (RandomForest)
		4491	3593	898	45	0.4243	12.6648	19.753	weka.classifiers.trees.RandomForest
		4491	3593	898	45	0.4218	12.6304	19.7652	weka.classifiers.meta.RandomSubSpace (RandomForest)
		4491	3593	898	45	0.409	12.8815	20.1546	weka.classifiers.meta.AdditiveRegression (RandomForest)
	Descriptors/FPs Type	Unique records	Training Set Molecules	Validation Set Molecules	Number of descriptors / FPs used	R	MAE	RMSE	Technique Used
	Fingerprinter	4694	3755	939	46	0.402	12.8807	20.2327	weka.classifiers.meta.Bagging (RandomForest)
		4694	3755	939	46	0.3996	12.7756	20.2595	weka.classifiers.meta.RandomSubSpace (RandomForest)
		4694	3755	939	46	0.3962	12.9253	20.3974	weka.classifiers.meta.RandomCommittee (RandomForest)
		4694	3755	939	46	0.3904	13.0156	20.4853	weka.classifiers.trees.RandomForest
		4694	3755	939	46	0.3808	12.9358	20.515	weka.classifiers.meta.RegressionByDiscretization (RandomForest)
	Descriptors/FPs Type	Unique records	Training Set Molecules	Validation Set Molecules	Number of descriptors / FPs used	R	MAE	RMSE	Technique Used
	ExtendedFingerprinter	4694	3755	939	45	0.4037	12.9122	20.2151	weka.classifiers.meta.Bagging (RandomForest)
		4694	3755	939	45	0.3986	12.9302	20.3665	weka.classifiers.meta.RandomCommittee (RandomForest)
		4694	3755	939	45	0.3933	12.7921	20.3318	weka.classifiers.meta.RandomSubSpace (RandomForest)
		4694	3755	939	45	0.3913	13.0142	20.4612	weka.classifiers.trees.RandomForest
		4694	3755	939	45	0.3854	12.9691	20.455	weka.classifiers.meta.RegressionByDiscretization (RandomForest)
	Descriptors/FPs Type	Unique records	Training Set Molecules	Validation Set Molecules	Number of descriptors / FPs used	R	MAE	RMSE	Technique Used
	EStateFingerprinter	4691	3753	938	12	0.2804	13.4121	21.1943	weka.classifiers.lazy.KStar (Normalize over the attributes)
		4691	3753	938	12	0.2804	13.4121	21.1943	weka.classifiers.lazy.KStar (Average column entropy curves)
		4691	3753	938	12	0.2642	13.6533	21.3781	weka.classifiers.meta.RandomSubSpace (RandomForest)
		4691	3753	938	12	0.2633	13.5834	21.2857	weka.classifiers.meta.RandomCommittee (REPTree)
		4691	3753	938	12	0.2607	13.6473	21.3807	weka.classifiers.meta.RandomSubSpace (RandomTree)
	Descriptors/FPs Type	Unique records	Training Set Molecules	Validation Set Molecules	Number of descriptors / FPs used	R	MAE	RMSE	Technique Used
	GraphOnlyFingerprinter	4693	3754	939	37	0.3391	13.0531	20.7355	weka.classifiers.meta.RandomSubSpace (RandomForest)
		4693	3754	939	37	0.3306	13.5458	20.8317	weka.classifiers.functions.GaussianProcesses (NormalizedPolyKernel)
		4693	3754	939	37	0.3258	13.2254	20.8407	weka.classifiers.meta.Bagging (REPTree)
		4693	3754	939	37	0.3251	13.3285	20.9654	weka.classifiers.meta.RandomSubSpace (REPTree)
		4693	3754	939	37	0.3238	13.0203	21.1867	weka.classifiers.lazy.KStar (Normalize over the attributes)
	Descriptors/FPs Type	Unique records	Training Set Molecules	Validation Set Molecules	Number of descriptors / FPs used	R	MAE	RMSE	Technique Used
	MACCSFingerprinter	4692	3754	938	19	0.3004	13.4131	21.0969	weka.classifiers.meta.Bagging (M5P)
		4692	3754	938	19	0.2968	13.4763	21.1229	weka.classifiers.functions.GaussianProcesses (RBFKernel)
		4692	3754	938	19	0.2953	12.587	21.8679	weka.classifiers.functions.SMOreg (RBFKernel)
		4692	3754	938	19	0.2928	13.3737	21.1634	weka.classifiers.meta.RandomSubSpace (RandomForest)
		4692	3754	938	19	0.2898	13.3783	21.1768	weka.classifiers.meta.RandomSubSpace (RandomTree)
	Descriptors/FPs Type	Unique records	Training Set Molecules	Validation Set Molecules	Number of descriptors / FPs used	R	MAE	RMSE	Technique Used
	PubchemFingerprinter	4692	3754	938	64	0.3983	12.8606	20.3	weka.classifiers.meta.RandomSubSpace (RandomForest)
		4692	3754	938	64	0.3967	12.8439	20.3041	weka.classifiers.meta.RandomSubSpace (RandomTree)
		4692	3754	938	64	0.3732	12.7462	20.8154	weka.classifiers.lazy.KStar (Normalize over the attributes)
		4692	3754	938	64	0.3732	12.7462	20.8154	weka.classifiers.lazy.KStar (Average column entropy curves)
		4692	3754	938	64	0.365	13.0098	20.5967	weka.classifiers.meta.Bagging (M5P)
	Descriptors/FPs Type	Unique records	Training Set Molecules	Validation Set Molecules	Number of descriptors / FPs used	R	MAE	RMSE	Technique Used
	SubstructureFingerprinter	4689	3751	938	36	0.2909	13.8592	21.1021	weka.classifiers.functions.GaussianProcesses (Normalized PolyKernel)
		4689	3751	938	36	0.2866	13.5451	21.1261	weka.classifiers.functions.LinearRegression (No attribute selection)
		4689	3751	938	36	0.2845	13.5628	21.1384	weka.classifiers.functions.LinearRegression (M5 method)
		4689	3751	938	36	0.2845	13.5628	21.1384	weka.classifiers.functions.LinearRegression (Greedy method)
		4689	3751	938	36	0.2758	13.2787	21.2293	weka.classifiers.lazy.KStar (Normalize over the attributes)
	Descriptors/FPs Type	Unique records	Training Set Molecules	Validation Set Molecules	Number of descriptors / FPs used	R	MAE	RMSE	Technique Used
	SubstructureFingerprintCount	4692	3754	938	72	0.3719	13.0331	20.5463	weka.classifiers.functions.GaussianProcesses (Puk)
		4692	3754	938	72	0.3696	13.0027	20.5523	weka.classifiers.meta.RandomSubSpace (RandomForest)
		4692	3754	938	72	0.3522	13.0877	20.7768	weka.classifiers.meta.RandomSubSpace (RandomTree)
		4692	3754	938	72	0.3457	12.9567	21.3847	weka.classifiers.functions.SMOreg (Puk)
		4692	3754	938	72	0.3428	13.5337	21.3189	weka.classifiers.meta.RandomCommittee (RandomForest)
	Descriptors/FPs Type	Unique records	Training Set Molecules	Validation Set Molecules	Number of descriptors / FPs used	R	MAE	RMSE	Technique Used
	KlekotaRothFingerprinter	4687	3750	937	318	0.3515	12.2678	21.3132	weka.classifiers.functions.SMOreg (RBFKernel)
		4687	3750	937	318	0.3499	12.9353	20.663	weka.classifiers.functions.GaussianProcesses (Puk)
		4687	3750	937	318	0.3353	13.3962	20.9227	weka.classifiers.functions.GaussianProcesses (RBFKernel)
		4687	3750	937	318	0.327	12.6745	21.3852	weka.classifiers.functions.SMOreg (Puk)
		4687	3750	937	318	0.3263	13.0747	20.8528	weka.classifiers.meta.RandomSubSpace (RandomForest)
	Descriptors/FPs Type	Unique records	Training Set Molecules	Validation Set Molecules	Number of descriptors / FPs used	R	MAE	RMSE	Technique Used
	KlekotaRothFingerprintCount	4686	3749	937	393	0.3723	12.8583	20.4611	weka.classifiers.functions.GaussianProcesses (Puk)
		4686	3749	937	393	0.3479	12.7979	20.7699	weka.classifiers.meta.Bagging (RandomForest)
		4686	3749	937	393	0.3465	12.2983	21.3322	weka.classifiers.functions.SMOreg (RBFKernel)
		4686	3749	937	393	0.3442	12.8527	20.8864	weka.classifiers.meta.RandomCommittee (RandomForest)
		4686	3749	937	393	0.3437	12.7886	21.2753	weka.classifiers.functions.SMOreg (Puk)
	Descriptors/FPs Type	Unique records	Training Set Molecules	Validation Set Molecules	Number of descriptors / FPs used	R	MAE	RMSE	Technique Used
	AtomPairs2DFingerprinter	4694	3755	939	69	0.2994	13.24	21.071	weka.classifiers.lazy.KStar (Normalize over the attributes)
		4694	3755	939	69	0.2994	13.24	21.071	weka.classifiers.lazy.KStar (Average column entropy curves)
		4694	3755	939	69	0.2974	13.4335	21.0914	weka.classifiers.meta.RandomSubSpace (RandomForest)
		4694	3755	939	69	0.292	13.4317	21.1079	weka.classifiers.meta.RandomSubSpace (RandomTree)
		4694	3755	939	69	0.2897	13.5516	21.1282	weka.classifiers.functions.LinearRegression (No attribute selection)
	Descriptors/FPs Type	Unique records	Training Set Molecules	Validation Set Molecules	Number of descriptors / FPs used	R	MAE	RMSE	Technique Used
	AtomPairs2DFingerprintCount	4694	3755	939	109	0.3351	13.3351	21.0112	weka.classifiers.meta.Bagging (RandomForest)
		4694	3755	939	109	0.3294	13.4761	21.259	weka.classifiers.meta.RandomCommittee (RandomForest)
		4694	3755	939	109	0.322	13.5432	21.3815	weka.classifiers.trees.RandomForest
		4694	3755	939	109	0.321	13.4379	21.271	weka.classifiers.meta.RegressionByDiscretization (RandomForest)
		4694	3755	939	109	0.3192	13.2126	20.9162	weka.classifiers.functions.GaussianProcesses (Puk)
