# Supplementary material for: ASCoVPred: a machine learning-based platform for quantitative prediction of anti-SARS-CoV-2 activity and human cell toxicity of molecules
Source: Research Square preprint supplement (doi:10.21203/rs.3.rs-967196/v1), 2021-10-13
Supplement: Supplementary file 12 [file cad6269564c93f2b06f60750.xlsx]

## Sheet: Table1
Table 1. Top 10 positively correlated fingerprints with maximum response.
Fingerprint	Pearson Correlation Coefficient (R) value
SubFPC84	0.232093
SubFPC41	0.180851
SubFPC12	0.170685
SubFPC14	0.165954
SubFPC286	0.145197
SubFPC285	0.145197
SubFPC282	0.145197
SubFPC281	0.141986
SubFPC283	0.135272
SubFPC13	0.135175

## Sheet: Table2
	Table 2. Highly active 100 compounds containing top 10 positively correlated fingerprints and their maximum response values.
	SubFPC84	SubFPC41	SubFPC12	SubFPC14	SubFPC286	SubFPC285	SubFPC282	SubFPC281	SubFPC283	SubFPC13	Maximum response
	0	0	0	0	0	0	0	0	0	0	-158.003
	0	0	0	0	0	0	0	0	0	0	-148.67
	0	0	0	0	0	0	0	0	0	0	-146.397
	0	0	0	0	0	0	0	0	0	0	-145.069
	0	0	0	0	0	0	0	0	0	0	-144.495
	0	0	0	0	0	0	0	0	0	0	-144.28
	0	0	0	0	0	0	0	0	0	0	-143.984
	0	0	0	0	0	0	0	0	0	0	-143.673
	0	0	0	0	0	0	0	0	0	0	-143.245
	0	0	0	0	0	0	0	0	0	0	-143.131
	0	0	0	0	0	0	0	0	0	0	-143.072
	0	0	0	0	0	0	0	0	0	0	-142.818
	0	0	1	0	0	0	0	0	0	0	-142.594
	0	0	0	0	0	0	0	0	0	0	-142.522
	0	0	0	0	0	0	0	0	0	0	-142.019
	0	0	0	0	0	0	0	0	0	0	-141.982
	0	0	0	0	0	0	0	0	0	0	-140.987
	0	0	0	0	0	0	0	0	0	0	-140.807
	0	0	0	0	0	0	0	0	0	0	-140.397
	0	0	0	0	0	0	0	0	0	0	-140.016
	0	0	1	1	1	1	1	0	0	0	-139.754
	0	0	0	0	0	0	0	0	0	0	-139.522
	0	0	0	0	0	0	0	0	0	0	-139.415
	0	0	0	0	0	0	0	0	0	0	-139.231
	0	0	0	0	0	0	0	0	0	0	-139.227
	0	0	1	1	0	0	0	0	0	0	-138.367
	0	0	0	0	0	0	0	0	0	0	-137.998
	0	0	1	1	0	0	0	0	0	0	-137.887
	0	0	0	0	0	0	0	0	0	0	-137.599
	0	0	0	0	0	0	0	0	0	0	-137.333
	0	0	0	0	0	0	0	0	0	0	-137.327
	0	0	0	0	0	0	0	0	0	0	-137.164
	0	0	0	0	0	0	0	0	0	0	-137.121
	0	0	0	0	0	0	0	0	0	0	-137.056
	0	0	0	0	0	0	0	0	0	0	-136.952
	0	0	0	0	0	0	0	0	0	0	-136.934
	0	0	0	0	0	0	0	0	0	0	-136.904
	0	0	0	0	0	0	0	0	0	0	-136.894
	0	0	0	0	0	0	0	0	0	0	-136.823
	0	0	0	0	0	0	0	0	0	0	-136.616
	0	0	1	0	0	0	0	0	0	1	-136.568
	0	0	0	0	0	0	0	0	0	0	-136.441
	0	0	0	0	0	0	0	0	0	0	-136.408
	0	0	0	0	0	0	0	0	0	0	-136.404
	0	2	10	7	1	1	1	1	1	2	-136.4
	0	0	0	0	0	0	0	0	0	0	-136.387
	0	0	0	0	0	0	0	0	0	0	-136.254
	0	0	0	0	0	0	0	0	0	0	-135.919
	0	0	0	0	0	0	0	0	0	0	-135.864
	0	0	0	0	0	0	0	0	0	0	-135.808
	0	0	0	0	0	0	0	0	0	0	-135.761
	0	0	1	1	0	0	0	0	0	0	-135.704
	0	0	0	0	0	0	0	0	0	0	-135.678
	0	0	0	0	0	0	0	0	0	0	-135.669
	0	0	0	0	0	0	0	0	0	0	-135.65
	0	0	3	2	0	0	0	0	0	0	-135.599
	0	0	0	0	0	0	0	0	0	0	-135.539
	0	0	0	0	0	0	0	0	0	0	-135.391
	0	0	0	0	0	0	0	0	0	0	-135.337
	0	0	1	1	0	0	0	0	0	0	-135.19
	1	0	0	0	1	1	1	0	0	0	-135.097
	0	0	0	0	0	0	0	0	0	0	-135.065
	0	3	7	5	2	2	2	2	2	1	-134.694
	0	0	0	0	0	0	0	0	0	0	-134.616
	0	1	3	2	0	0	0	1	0	1	-134.607
	0	0	0	0	0	0	0	0	0	0	-134.549
	0	0	1	0	0	0	0	0	0	1	-134.513
	0	2	6	6	4	4	4	2	2	0	-134.35
	0	0	0	0	0	0	0	0	0	0	-134.204
	0	0	0	0	0	0	0	0	0	0	-134.08
	0	0	0	0	0	0	0	0	0	0	-133.57
	0	0	0	0	0	0	0	0	0	0	-133.52
	0	2	8	5	1	1	1	1	1	1	-133.279
	0	0	0	0	0	0	0	0	0	0	-133.278
	1	0	0	0	0	0	0	1	0	0	-133.187
	0	0	1	0	0	0	0	0	0	1	-133.084
	0	0	0	0	0	0	0	0	0	0	-133.015
	0	0	0	0	0	0	0	0	0	0	-132.978
	0	0	0	0	0	0	0	0	0	0	-132.658
	0	0	1	1	0	0	0	0	0	0	-132.631
	0	0	0	0	0	0	0	0	0	0	-132.567
	0	0	2	1	1	1	1	0	0	0	-132.238
	0	0	0	0	0	0	0	0	0	0	-132.236
	0	0	1	1	0	0	0	0	0	0	-132.23
	0	0	0	0	0	0	0	0	0	0	-132.228
	0	0	0	0	0	0	0	0	0	0	-132.165
	0	0	0	0	0	0	0	0	0	0	-132.045
	0	0	0	0	0	0	0	0	0	0	-132.011
	0	0	0	0	0	0	0	0	0	0	-131.564
	0	0	0	0	0	0	0	0	0	0	-131.554
	0	0	0	0	0	0	0	0	0	0	-131.515
	0	0	0	0	0	0	0	0	0	0	-131.402
	0	0	1	1	0	0	0	0	0	0	-131.372
	0	0	0	0	0	0	0	0	0	0	-131.082
	0	0	3	2	2	2	2	3	2	0	-130.978
	1	6	14	12	6	6	6	5	5	2	-130.964
	0	0	0	0	0	0	0	0	0	0	-130.957
	0	0	0	0	0	0	0	0	0	0	-130.94
	0	0	0	0	0	0	0	0	0	0	-130.933
	0	0	0	0	0	0	0	0	0	0	-130.843
Average values:->	0.03	0.16	0.68	0.5	0.19	0.19	0.19	0.16	0.13	0.1	-136.611

## Sheet: Table3
	Table 3. Least active 100 compounds containing top 10 positively correlated fingerprints and their maximum response values.
	SubFPC84	SubFPC41	SubFPC12	SubFPC14	SubFPC286	SubFPC285	SubFPC282	SubFPC281	SubFPC283	SubFPC13	Maximum response
	0	0	1	0	0	0	0	0	0	1	4.27412
	0	2	5	3	2	2	2	1	1	2	4.27751
	0	0	2	0	0	0	0	0	0	2	4.28047
	2	0	0	0	0	0	0	0	0	0	4.28458
	0	0	1	1	0	0	0	0	0	0	4.29204
	0	0	0	0	0	0	0	0	0	0	4.29372
	1	0	0	0	0	0	0	0	0	0	4.30236
	1	2	4	3	2	2	2	1	1	1	4.30354
	0	3	9	7	2	2	2	2	2	1	4.30461
	0	0	1	1	0	0	0	1	0	0	4.30524
	0	5	11	8	3	3	3	3	3	3	4.30683
	0	0	0	0	0	0	0	0	0	0	4.31741
	1	0	0	0	0	0	0	0	0	0	4.33267
	0	0	3	1	0	0	0	0	0	1	4.36545
	0	3	7	4	1	1	1	1	1	1	4.3741
	0	0	0	0	0	0	0	0	0	0	4.37514
	0	0	0	0	0	0	0	0	0	0	4.37962
	0	0	0	0	0	0	0	0	0	0	4.38667
	1	0	0	0	0	0	0	0	0	0	4.39822
	0	3	6	5	2	2	2	2	2	1	4.40288
	1	0	0	0	0	0	0	0	0	0	4.41226
	0	0	0	0	0	0	0	0	0	0	4.43268
	0	0	0	0	0	0	0	0	0	0	4.44237
	0	0	0	0	0	0	0	0	0	0	4.44384
	0	0	0	0	0	0	0	0	0	0	4.44742
	1	0	1	1	0	0	0	0	0	0	4.45305
	0	0	0	0	0	0	0	0	0	0	4.45522
	1	0	0	0	0	0	0	0	0	0	4.45531
	0	0	0	0	0	0	0	0	0	0	4.46168
	0	0	0	0	0	0	0	0	0	0	4.46612
	1	0	1	0	0	0	0	0	0	0	4.47472
	1	0	1	1	0	0	0	1	0	0	4.48452
	0	0	1	0	0	0	0	0	0	0	4.50301
	0	2	4	3	3	3	3	1	1	1	4.51427
	0	4	7	6	2	2	2	2	2	1	4.52478
	0	0	0	0	0	0	0	0	0	0	4.52891
	0	0	1	1	0	0	0	0	0	0	4.55782
	0	0	0	0	0	0	0	0	0	0	4.55937
	0	0	0	0	0	0	0	0	0	0	4.59352
	0	3	7	4	2	2	2	1	1	1	4.59482
	0	0	0	0	0	0	0	0	0	0	4.59521
	1	0	3	2	0	0	0	0	0	1	4.59601
	1	0	0	0	0	0	0	0	0	0	4.59833
	0	0	0	0	0	0	0	0	0	0	4.60833
	0	0	2	1	0	0	0	0	0	0	4.60964
	2	0	0	0	0	0	0	0	0	0	4.61504
	0	0	0	0	0	0	0	0	0	0	4.62633
	0	0	0	0	0	0	0	0	0	0	4.62706
	0	0	0	0	0	0	0	0	0	0	4.63682
	0	7	18	14	6	6	6	6	6	3	4.64135
	0	0	1	1	0	0	0	0	0	0	4.64196
	0	0	1	0	0	0	0	0	0	0	4.64901
	0	0	0	0	0	0	0	0	0	0	4.65645
	0	8	17	15	6	6	6	6	6	2	4.66072
	1	0	0	0	0	0	0	0	0	0	4.67086
	0	0	0	0	0	0	0	0	0	0	4.69036
	0	2	6	4	3	3	3	2	2	2	4.69807
	1	0	0	0	0	0	0	0	0	0	4.72073
	0	2	7	5	2	2	2	2	2	1	4.72985
	0	0	0	0	0	0	0	0	0	0	4.7304
	0	0	1	0	0	0	0	0	0	1	4.73654
	1	0	0	0	0	0	0	0	0	0	4.73805
	1	0	0	0	0	0	0	0	0	0	4.74309
	0	0	1	0	1	1	1	0	0	1	4.7472
	1	1	3	2	0	0	0	0	0	1	4.76295
	0	0	0	0	0	0	0	0	0	0	4.7681
	0	0	0	0	0	0	0	0	0	0	4.77496
	0	8	16	16	7	7	7	7	7	0	4.78571
	0	0	1	1	0	0	0	0	0	0	4.8089
	1	0	1	0	0	0	0	0	0	0	4.81258
	0	0	0	0	0	0	0	0	0	0	4.81321
	0	4	8	6	3	3	3	2	2	2	4.82119
	1	4	8	8	3	3	3	3	3	0	4.82121
	0	0	0	0	0	0	0	0	0	0	4.8347
	0	0	0	0	0	0	0	0	0	0	4.84627
	0	0	0	0	0	0	0	0	0	0	4.84774
	0	0	1	0	1	1	1	1	1	1	4.85211
	0	5	8	7	1	1	1	1	1	1	4.85377
	1	0	2	2	0	0	0	0	0	0	4.86944
	0	0	1	1	0	0	0	0	0	0	4.87254
	0	0	0	0	0	0	0	0	0	0	4.87389
	0	0	3	1	0	0	0	0	0	2	4.8769
	0	0	0	0	0	0	0	0	0	0	4.87817
	0	1	2	2	0	0	0	0	0	0	4.88142
	0	0	0	0	0	0	0	0	0	0	4.88523
	0	0	0	0	0	0	0	0	0	0	4.88626
	0	0	3	2	2	2	2	0	0	0	4.89497
	0	0	0	0	0	0	0	0	0	0	4.89834
	0	0	2	0	0	0	0	0	0	1	4.90458
	0	0	0	0	0	0	0	0	0	0	4.9267
	1	0	0	0	0	0	0	0	0	0	4.92948
	0	1	2	2	0	0	0	0	0	0	4.94346
	0	0	0	0	0	0	0	0	0	0	4.96971
	0	0	0	0	0	0	0	0	0	0	4.97049
	0	0	0	0	0	0	0	0	0	0	4.98311
	0	0	1	0	0	0	0	0	0	0	4.98339
	0	2	4	3	0	0	0	0	0	1	4.98382
	0	0	0	0	0	0	0	0	0	0	4.9889
	0	10	22	20	8	8	8	8	8	2	4.99642
	0	0	0	0	0	0	0	0	0	0	4.99772
Average values:->	0.24	0.82	2.18	1.64	0.62	0.62	0.62	0.54	0.52	0.38	4.64129

## Sheet: Table4
Table 4. Top 10 positively correlated fingerprints and their average values for highly active and least active compounds.
Fingerprint	Highly active compounds (n=100)	Least active compounds (n=100)
SubFPC84	0.03	0.24
SubFPC41	0.16	0.82
SubFPC12	0.68	2.18
SubFPC14	0.5	1.64
SubFPC286	0.19	0.62
SubFPC285	0.19	0.62
SubFPC282	0.19	0.62
SubFPC281	0.16	0.54
SubFPC283	0.13	0.52
SubFPC13	0.1	0.38
Maximum response	-136.611	4.64129
