# Supplementary material for: ASCoVPred: a machine learning-based platform for quantitative prediction of anti-SARS-CoV-2 activity and human cell toxicity of molecules
Source: Research Square preprint supplement (doi:10.21203/rs.3.rs-967196/v1), 2021-10-13
Supplement: Supplementary file 14 [file dd246ba3c7c8a9c22f21f6be.xlsx]

## Sheet: Table1
Table 1. Top 10 negatively correlated fingerprints with maximum response.
Fingerprint	Pearson Correlation Coefficient (R) value
C2SP2	-0.47753
C3SP2	-0.456295
CrippenLogP	-0.383243
SP-7	-0.380676
MLFER_E	-0.353564
nF10Ring	-0.243155
VE1_D	-0.204271
maxdssC	-0.197243
maxdsCH	-0.176759
VE1_Dzi	-0.157756

## Sheet: Table2
	Table 2. Highly active 100 compounds containing top 10 negatively correlated fingerprints and their maximum response values.
	C2SP2	C3SP2	CrippenLogP	SP-7	MLFER_E	nF10Ring	VE1_D	maxdssC	maxdsCH	VE1_Dzi	Maximum response
	15	4	3.98827	3.55815	2.392	0	0	1.25085	2.21268	0	-99.4652
	17	0	7.64875	3.28225	3.119	0	0	1.60077	2.36153	0.053229	-99.4482
	23	6	9.65064	8.08703	4.89	2	0	1.11445	2.13092	0.006997	-99.4094
	15	4	3.92227	3.05251	2.142	0	0	1.26038	2.20588	0.041032	-99.1154
	0	0	0.39479	1.41637	1.28	0	0.266534	0	0	0.300767	-99.0596
	16	10	-0.28923	12.2374	5.65	4	0	0	0	0	-98.768
	17	6	3.61705	6.00397	4.041	1	0.144244	0.906951	1.86148	0.137698	-98.7554
	10	4	0.42928	4.47973	3.2	2	0	0	0	0	-98.6337
	24	8	6.24511	7.96648	7.252	2	0	0	0	0	-98.5019
	24	0	8.83775	5.68027	3.357	2	0.2053	1.05361	2.17619	0.216991	-98.2839
	6	2	4.79358	1.6868	1.217	1	0.185553	1.30584	2.25502	0.147783	-98.2828
	16	4	6.74191	4.87752	3.431	0	0.42443	0	0	0.594343	-98.2738
	7	3	3.14707	3.17296	1.645	0	0.264803	0.47413	0	0.413324	-98.221
	19	2	6.14022	3.72791	3.09	1	0.028746	0	2.21937	0.067739	-97.6835
	15	5	6.20528	3.02909	2.202	0	0.408134	1.3547	0	0.455071	-97.6198
	34	8	7.74388	9.37541	6.056	0	0	0.806868	1.95313	0.001155	-97.5438
	17	4	5.49487	4.67646	3.707	0	0.430311	0	0	0.550996	-97.3866
	7	1	4.07658	1.11556	2.242	0	0.062613	1.96578	2.56095	0.04186	-97.2143
	14	5	4.65678	2.76802	2.775	0	0.022867	1.10472	1.97194	0.005361	-96.7274
	5	5	4.01924	1.35042	1.401	1	0.131529	0	0	0.288184	-96.6363
	12	0	3.72538	2.96156	2.654	2	0	0	0	0.005583	-96.6037
	16	4	6.77178	3.01184	2.329	0	0.374536	1.43395	0	0.452888	-96.2663
	15	5	6.42418	3.25368	2.329	0	0.427337	1.43032	0	0.462834	-96.0995
	14	6	5.80536	6.99232	4.255	0	0.37433	0.457306	0	0.454542	-95.9317
	7	5	4.74775	3.45414	2.776	1	0.21314	0.01212	0	0.263233	-95.7745
	10	5	1.56008	8.57818	4.058	2	0.107204	1.09869	2.0238	0.055332	-95.6904
	7	4	5.57236	6.23829	2.299	2	0.32269	1.57295	1.92619	0.08561	-95.227
	5	1	0.67619	0.821238	1.25	0	0.00275	0	0	0.114766	-95.1966
	12	3	1.97387	7.67581	2.354	2	0.259919	1.35733	1.59846	0.234977	-95.0435
	4	3	3.91256	4.04756	1.417	2	0.01776	1.45921	2.28817	0.115568	-95.015
	14	2	6.32365	4.85267	4.303	0	0.020925	0	1.24772	0.156406	-94.8866
	12	0	5.56589	3.88452	2.516	2	0.311135	0	0	0.366145	-94.7343
	12	0	4.49489	1.86925	2.226	2	0	0	0	0.009855	-94.4006
	9	6	3.84638	9.67191	3.518	3	0.477035	0.005731	0	0.528246	-94.0208
	11	1	4.4326	2.77642	2.687	2	0.061713	0	0	0.100912	-94.0161
	7	1	3.52019	0.99925	2.733	1	0.018567	0	0	0.156984	-93.9799
	5	2	3.41677	1.17741	1.733	0	0.041251	1.01128	1.8791	0.184974	-93.9209
	7	1	3.34888	0.937923	0.847	0	0.100469	0	1.73328	0.24583	-93.764
	14	5	6.82785	5.70414	5.587	2	0.011841	0.916793	1.99398	0.007885	-93.625
	12	0	5.18197	4.32433	3.052	2	0.257741	0.349485	0	0.365857	-93.1837
	9	6	1.97538	7.61348	3.399	3	0.389191	0	0	0.486229	-93.1231
	6	1	2.15628	2.43141	2.477	1	0.12405	0	1.47194	0.26831	-93.0077
	11	3	4.37877	8.56846	2.625	2	0.129681	0	0	0.105117	-92.9411
	7	1	4.51918	1.09891	0.847	0	0.025157	0	1.7587	0.199404	-92.8747
	6	1	4.47909	1.87305	1.597	0	0.317926	1.22066	2.41724	0.508232	-92.57
	7	3	5.31207	3.29057	2.91	0	0.10815	0	0	0.052518	-92.3703
	8	4	-1.49843	5.59084	3.276	3	0.023631	0	0	0.025381	-92.3069
	8	5	0.11906	5.50266	3.402	3	0.053884	0.224435	0	0.014662	-92.2309
	18	5	7.27857	4.42036	3.61	1	0.222797	0	2.15153	0.066289	-92.0788
	24	8	7.5239	9.3534	7.252	2	0	0	0	0	-92.0332
	10	4	1.84159	2.42995	2.067	2	0.002306	0	0	0.015651	-91.947
	15	5	4.3433	3.98096	3.286	0	0.00749	0.440307	0	0.040789	-91.9368
	10	3	1.70077	8.09396	2.158	2	0.061049	1.35484	0	0.067257	-91.729
	16	5	5.03547	5.20142	3.605	1	0.04603	0.935413	1.74088	0.050904	-91.6044
	14	4	4.46279	2.0539	2.276	1	0.208786	0	2.22268	0.229895	-91.3476
	9	3	3.5858	2.86591	3.351	1	0.02933	0	0	0.101752	-91.0003
	10	6	6.30637	8.3955	4.052	1	0.139327	0.179467	1.68437	0.133294	-90.5152
	18	6	-1.20301	9.3108	7.231	0	0.884349	0	0	0.640431	-90.4105
	19	3	7.52067	4.99822	4.352	1	0.035297	0	0	0.04815	-90.3653
	10	2	3.93699	1.60887	1.812	0	0	0	0	0	-90.3439
	6	3	4.1744	1.90727	1.314	0	0.275833	1.05797	2.12361	0.120486	-89.9597
	11	2	3.35629	2.72097	2.678	2	0.131351	0	0	0.29652	-89.9191
	12	0	4.53068	3.84649	2.015	2	0.055891	0	0	0.030577	-89.8254
	14	4	7.54831	2.86817	4.021	0	0.000248	0	0	0.011743	-89.5947
	8	6	5.24432	1.4167	1.31	0	0.230148	1.12264	2.137	0.252003	-89.4071
	10	2	6.17939	2.21113	2.264	0	0.072743	0	0	0.102316	-89.3783
	10	2	2.61098	2.19738	2.117	0	0.012133	0	0	0.011816	-89.0977
	9	6	0.77048	8.10845	3.549	3	0.250987	0	0	0.362254	-89.0725
	6	2	5.58749	2.05766	2.109	0	0.118849	0	0	0.17544	-88.9883
	9	4	2.43909	2.2059	1.997	2	0	0	0	0	-88.9863
	10	4	5.65518	2.21423	1.609	0	0.326798	0.616025	0	0.531067	-88.9255
	17	5	7.23509	10.6719	5.521	1	0.017455	0	0	0.000522	-88.9217
	11	1	4.62568	4.63494	2.92	0	0.307324	0.145829	0	0.287083	-88.89
	12	2	3.15488	1.07591	1.464	0	0	0	1.74338	0.02514	-88.8646
	8	5	-0.53434	5.33966	3.267	3	0.067525	0.167336	0	0.001459	-88.7885
	5	1	4.09419	1.36745	0.939	0	0.075143	0	0	0.268782	-88.4743
	5	1	0.64099	0.30753	1.224	0	0.036042	0	0	0.118207	-88.4287
	18	6	7.74878	9.01681	3.732	2	0.158384	0	0	0.183506	-88.3881
	9	3	2.18379	2.54688	2.181	1	0.096983	0	0	0.088002	-88.3121
	5	1	-3.41911	7.10208	5.22	0	0.895784	0	0	1.10407	-88.2747
	12	7	5.6389	7.73278	3.772	0	0.222186	0.306947	1.75742	0.590343	-88.27
	9	6	3.28108	7.77276	3.065	3	0.249369	0	0	0.233512	-88.27
	8	6	4.76582	1.3302	1.382	0	0.24945	1.08486	2.10786	0.249193	-88.2006
	13	3	4.20407	8.12158	2.834	2	0.222344	0	1.62945	0.192368	-87.6516
	11	4	4.06707	4.4654	3.387	0	0.05192	0	0	0.117207	-87.6421
	11	5	4.82947	9.81662	3.717	1	0.102519	0.249548	1.71088	0.249983	-87.5898
	10	2	6.8467	1.63742	2.244	0	0	0	0	0	-87.5314
	0	0	-2.89521	0.431824	1.003	0	0.0783	0	0	0.033115	-87.4614
	7	5	2.92779	3.89574	2.346	4	0.05873	0	0	0.082082	-87.4604
	16	5	4.28197	5.47749	3.376	0	0.245577	0.388509	0	0.222036	-87.3843
	4	3	3.81485	4.21362	1.68	2	0.140685	1.42162	2.23257	0.02071	-87.2806
	10	3	4.20013	3.63841	2.592	0	0.029996	0.602289	1.77993	0.089277	-87.2663
	10	3	1.69217	7.6113	2.136	2	0.115891	1.39924	0	0.074332	-87.1284
	10	5	4.54828	4.73886	2.954	0	0.055178	0	0	0.087074	-86.8573
	10	2	3.26817	1.35749	2.225	0	0	0.022381	1.67485	0	-86.8097
	5	4	2.76208	8.49704	3.712	2	0.15499	1.14033	2.074	0.059288	-86.482
	12	0	6.41269	3.76544	2.385	2	0.222659	0	0	0.329729	-86.3654
	8	5	-0.85371	5.14583	3.02	2	0.126339	0	0	0.271249	-86.3435
	9	6	1.44348	6.17839	3.215	3	0.184007	0	0	0.303652	-86.3349
	10	2	6.24259	2.10237	2.445	0	0.193834	0	0	0.243651	-86.1423
Average values:->	11.21	3.49	4.04672	4.45208	2.90538	1.04	0.146174	0.393849	0.730181	0.18165	-92.2412

## Sheet: Table3
	Table 3. Least active 100 compounds containing top 10 negatively correlated fingerprints and their maximum response values.
	C2SP2	C3SP2	CrippenLogP	SP-7	MLFER_E	nF10Ring	VE1_D	maxdssC	maxdsCH	VE1_Dzi	Maximum response
	0	0	-6.6523	3.29233	2.458	0	0.01041	0	0	0.016768	3.15369
	6	0	1.65359	0.967901	1.886	0	0.099264	0.905097	0	0.08909	3.1965
	0	0	1.2164	0	0.219	0	0.073483	0	0	0.08642	3.21553
	8	2	2.8398	0.704124	1.392	1	0	0	0	0	3.23946
	7	1	3.3855	0.632693	1.189	0	0.122687	0.036389	1.76713	0.19398	3.2496
	0	0	-0.0863	0	0.777	0	0.14543	0	0	0.233016	3.27495
	0	0	-2.9561	0	1.333	0	0.202272	0	0	0.231861	3.28509
	0	0	-0.90171	0.279463	0.805	0	0.242147	0	0	0.200274	3.3003
	5	1	2.51687	2.94389	2.955	1	0.266666	0	0	0.457426	3.3155
	6	0	2.18458	0.532657	1.168	0	0.070676	0	0	0.112547	3.32017
	1	0	-5.30901	3.11314	2.894	0	0.129869	0	0	0.282058	3.32969
	2	1	0.74819	0.235702	0.754	0	0.030857	0	0	0.152338	3.34085
	5	1	-1.68221	4.19221	2.919	0	0.030302	0	0	0.068249	3.34085
	6	0	2.41569	2.04086	2.07	1	0.014819	0	0	0.065458	3.35606
	0	0	-0.57451	0.399786	1.33	0	0	0	0	0	3.38141
	5	1	3.37689	1.99675	0.862	0	0.278657	0	0	0.247883	3.40169
	6	0	1.85869	1.60481	1.424	0	0.098863	0	0	0.054817	3.40676
	1	1	-0.75944	2.46719	2.238	0	0.042189	0.694401	0	0.25303	3.45336
	2	0	1.59268	1.24498	1.419	0	0.233986	0	1.56394	0.323635	3.46763
	10	2	3.3598	3.14	1.486	0	0.175755	0	0	0.272332	3.47773
	1	2	0.96966	2.8385	2.624	1	0.131879	0	1.34875	0.103399	3.4828
	2	0	-0.53463	3.48632	1.816	0	0.175107	0.977604	0	0.100929	3.51995
	0	0	1.22419	3.42096	1.701	0	0.122849	0	0	0.005175	3.56898
	6	0	-1.05261	0.708597	1.952	0	0.165453	0	0	0.044187	3.57228
	1	0	0.21808	0	0.945	0	0.015588	1.52701	1.83402	0.05108	3.59606
	4	0	2.10109	1.0471	1.108	0	0.034963	0.447269	0	0.083749	3.61033
	0	0	0.5422	0.492799	0.401	0	0.11562	0	0	0.136045	3.62982
	6	2	3.25581	1.37966	0.939	0	0.026614	0	0	0.016256	3.62982
	7	3	3.1403	3.19399	1.799	2	0.166228	0	0	0.278591	3.62982
	18	8	11.9785	1.88535	1.872	0	0	1.4084	2.29651	0	3.64363
	5	1	0.31709	0.576538	1.357	0	0.1099	0	0	0.182663	3.64503
	0	0	0.48808	0	0.611	0	0.053128	0	1.80556	0.268486	3.6501
	5	1	2.46067	4.80503	1.662	2	0.199998	1.08157	1.95523	0.201242	3.65314
	1	1	1.46347	1.17342	1.457	0	0.102193	0.835046	1.96332	0.246624	3.65517
	1	1	-0.27601	2.79991	1.549	0	0.242557	0	0	0.331756	3.66531
	6	2	4.26657	1.23619	1.371	0	0.119905	0.601482	0	0.044752	3.67038
	2	1	-0.15291	0.782118	1.196	0	0.173393	0	0	0.196171	3.68052
	5	1	-1.22351	2.93981	2.399	0	0.014624	0	0	0.038644	3.68168
	5	2	2.30179	1.81915	1.366	1	0.23227	0.19134	0	0.303858	3.69572
	5	0	0.17249	1.19792	1.006	0	0	0	0	0.008091	3.70071
	5	1	1.79081	0	0.837	0	0	0	0	0.056145	3.74352
	15	3	1.70389	2.65302	2.737	0	0.154746	0	0	0.09382	3.74828
	6	0	0.92799	0.772568	1.03	0	0.168033	0	0	0.296488	3.76163
	7	1	2.74223	1.0996	1.647	0	0.034836	0	0	0.039501	3.7667
	0	0	0.27819	0.736781	0.145	0	0	0	0	0	3.77177
	5	1	1.06459	0.5793	1.154	0	0.180095	0	0	0.288226	3.81011
	0	0	0.18639	0.56989	1.421	0	0.169481	0.321426	0	0.217827	3.82753
	0	0	-2.3274	0.426777	0.832	0	0	0	0	0	3.8326
	5	1	2.21949	1.68801	1.47	0	0.267334	0	0	0.331609	3.83767
	2	1	0.83659	0.319036	0.682	0	0.0547	0	0	0.193862	3.84274
	1	1	0.77318	11.1933	3.414	2	0.045222	0.88508	1.55899	0.044027	3.86244
	0	0	-0.2248	0	1.096	0	0.14543	0	0	0.28111	3.8833
	0	0	-4.4924	1.13479	1.476	0	0.21753	0	0	0.158046	3.8833
	8	0	2.4615	1.03546	2.361	0	0.007199	0	0	0.071727	3.89344
	0	0	0.51139	0.824929	1.034	0	0.011462	0.12088	0	0.052547	3.89851
	5	1	1.92579	2.07697	1.046	0	0.106016	0	0	0.032936	3.90525
	0	0	2.66539	0.216506	0.152	0	0.062731	0	0	0.116281	3.92386
	15	0	6.12697	1.9847	1.925	0	0.01917	0	0	0.055643	3.93379
	6	2	4.14507	2.3472	1.665	1	0.111145	0.941233	0	0.196214	3.9999
	3	1	3.60838	4.09541	1.357	2	0.116593	1.39438	1.92931	0.049576	4.00038
	1	0	3.53788	0.408757	0.279	0	0.048363	0	1.94884	0.058038	4.04045
	5	1	0.97059	0.713531	1.146	0	0.050481	0	0	0.06192	4.05566
	10	2	3.7213	1.06124	1.546	0	0.040251	0	0	0.061403	4.09115
	9	1	2.8094	1.67758	1.375	0	0.271454	0	0	0.373674	4.1165
	7	1	1.14347	1.09157	2.048	0	0.094664	0.833632	0	0.082274	4.16212
	7	2	3.10099	1.98729	1.869	2	0	0	0	0.22989	4.1824
	11	1	0.95538	2.42971	1.927	0	0.048378	0	0	0.04557	4.19761
	10	2	3.15768	3.25558	1.651	0	0.166293	0	0	0.29638	4.22394
	8	1	4.10571	1.04674	1.721	1	0.058449	0	0	0.013688	4.24324
	4	2	-1.14151	2.86592	4.431	0	0	0	0	0	4.26675
	0	0	1.1659	0	0.34	0	0.091044	0	0	0.105348	4.27873
	0	1	0.35238	0.628003	1.455	0	0.042844	0	0	0.118304	4.30957
	0	0	2.99819	1.00221	0.424	0	0.287323	0	0	0.161941	4.31432
	0	0	3.74969	1.7511	0.228	0	0.14719	0.074358	0	0.192716	4.32859
	0	0	-2.45071	1.53798	1.093	0	0	0	0	0	4.36998
	5	1	1.26628	1.10522	2.029	0	0.116433	0	0	0.188734	4.39994
	0	0	-1.54321	1.91848	1.61	0	0.229064	0	0	0.105775	4.4156
	0	0	0.48959	0	-0.128	0	0.0824	0	0	0.076174	4.45616
	3	0	5.28238	1.90941	0.818	0	0.053664	0.280245	2.04391	0.043323	4.48556
	10	2	0.57299	2.86314	2.474	0	0.247842	0	0	0.275638	4.49672
	7	1	1.84418	0.647568	0.934	0	0.079023	0	1.52954	0.106307	4.52206
	0	0	-0.30551	0.907043	1.305	0	0.001834	0	0	0.045181	4.52713
	11	2	2.88599	0.916116	1.427	0	0	0.075185	0	0	4.54234
	2	1	6.80658	4.79573	1.078	2	0.416108	1.3288	1.94886	0.404056	4.54264
	1	0	-1.27341	3.34739	2.462	0	0.001959	0	0	0.233254	4.57783
	4	2	5.91458	4.71864	1.303	2	0.130482	0	0	0.021793	4.59497
	4	2	3.58833	1.74959	1.522	0	0.056085	0.177037	0	0.069167	4.62826
	0	0	-1.97221	0.647328	1.604	0	0.040164	0	0	0.10962	4.68059
	5	1	1.6145	0.758307	1.111	0	0.206427	0	0	0.299106	4.68936
	6	0	2.87768	0.840019	1.017	0	0.018583	0	0	0.072931	4.6995
	5	1	1.37039	1.07405	1.413	0	0.064132	0.021194	0	0.1427	4.71978
	5	1	1.41389	0.424758	0.979	0	0.082668	0	0	0.208858	4.7502
	5	1	1.29659	2.74355	1.208	0	0.104472	0	0	0.039246	4.75527
	0	0	6.2402	0.801777	0.205	0	0	0	0	0.00574	4.76034
	4	3	0.39487	4.3237	1.495	2	0.268104	1.50401	0	0.262087	4.78999
	0	0	3.1992	0.19245	0.133	0	0.057664	0	0	0.123152	4.83756
	5	1	1.78119	1.91012	1.37	0	0.067383	0	0	0.019046	4.87086
	0	0	-0.20864	0.176777	1.099	0	0.107701	0.088843	0	0.261253	4.89721
	4	2	1.15029	1.4217	3.274	0	0.091929	0	0	0.024418	4.92763
	4	0	0.74819	0.235702	0.754	0	0.030857	0	0	0.145143	4.98847
Average values:->	3.95	0.83	1.40422	1.61212	1.42219	0.23	0.10244	0.167519	0.254939	0.136423	3.95952

## Sheet: Table4
Table 4. Top 10 negatively correlated fingerprints and their average values for highly active and least active compounds.
Fingerprint	Highly active compounds (n=100)	Least active compounds (n=100)
C2SP2	11.21	3.95
C3SP2	3.49	0.83
CrippenLogP	4.04672	1.40422
SP-7	4.45208	1.61212
MLFER_E	2.90538	1.42219
nF10Ring	1.04	0.23
VE1_D	0.146174	0.10244
maxdssC	0.393849	0.167519
maxdsCH	0.730181	0.254939
VE1_Dzi	0.18165	0.136423
Maximum response	-92.2412	3.95952
