# Supplementary material for: ASCoVPred: a machine learning-based platform for quantitative prediction of anti-SARS-CoV-2 activity and human cell toxicity of molecules
Source: Research Square preprint supplement (doi:10.21203/rs.3.rs-967196/v1), 2021-10-13
Supplement: Supplementary file 16 [file e2942dc6903df65e7ece8630.xlsx]

## Sheet: Table1
Table 1. Top 10 negatively correlated fingerprints with maximum response.
Fingerprint	Pearson Correlation Coefficient (R) value
SubFPC307	-0.365947
SubFPC274	-0.359618
SubFPC287	-0.255927
SubFPC137	-0.200464
SubFPC169	-0.172233
SubFPC171	-0.165212
SubFPC136	-0.162393
SubFPC33	-0.153186
SubFPC21	-0.143986
SubFPC303	-0.138455

## Sheet: Table2
	Table 2. Highly active 100 compounds containing top 10 negatively correlated fingerprints and their maximum response values.
	SubFPC307	SubFPC274	SubFPC287	SubFPC137	SubFPC169	SubFPC171	SubFPC136	SubFPC33	SubFPC21	SubFPC303	Maximum response
	22	12	8	0	0	0	0	2	0	2	-102.125
	17	12	0	0	1	0	0	0	0	0	-101.889
	22	21	0	0	2	0	0	0	0	0	-101.889
	29	24	3	1	0	0	1	0	0	1	-101.889
	11	10	0	0	0	0	0	0	0	0	-101.653
	29	22	4	0	0	1	0	0	0	0	-101.181
	9	10	0	0	1	0	0	0	0	0	-100.945
	27	18	6	0	0	2	0	1	0	4	-100.708
	13	14	0	0	0	0	0	0	0	0	-100.472
	14	14	0	0	3	0	0	0	0	0	-100.472
	35	20	6	0	0	0	0	1	0	1	-100.236
	13	14	0	0	0	0	0	0	0	0	-100
	22	21	4	5	2	0	0	0	0	0	-100
	7	0	0	0	0	0	0	0	0	0	-100
	20	12	10	5	0	4	0	0	0	2	-99.7639
	24	21	4	0	0	0	0	1	0	0	-99.5528
	21	12	8	0	0	0	0	1	0	2	-99.5277
	3	0	0	0	0	0	0	0	0	0	-99.5277
	9	10	0	0	1	1	0	0	0	0	-99.5277
	9	6	3	0	0	0	0	0	0	1	-99.5277
	21	15	4	0	0	0	0	0	0	0	-99.1056
	23	0	1	0	0	0	0	0	0	0	-99.1056
	19	12	8	0	0	0	0	0	0	2	-98.9939
	44	31	0	0	0	0	0	0	0	0	-98.9939
	16	6	4	2	0	0	0	0	0	2	-98.8821
	18	15	2	3	0	0	0	0	0	0	-98.8821
	15	6	6	2	0	0	0	0	0	1	-98.8194
	25	12	8	1	1	0	0	0	0	1	-98.6585
	30	24	6	4	0	0	0	0	0	2	-98.5832
	10	6	2	0	0	0	0	0	0	0	-98.5467
	13	6	4	2	0	1	0	0	0	0	-98.4349
	75	60	20	20	25	0	0	0	0	0	-98.4349
	12	12	0	0	0	0	0	0	0	0	-98.3471
	18	6	0	0	0	0	0	0	0	0	-98.3231
	18	12	8	12	2	0	2	0	0	0	-98.111
	36	24	4	2	0	0	0	1	0	2	-98.111
	36	32	24	0	2	0	0	0	0	0	-98.111
	25	15	2	2	0	0	0	0	0	0	-97.9877
	27	16	16	0	1	0	0	1	0	2	-97.8749
	28	24	0	0	0	0	0	0	0	0	-97.8749
	12	12	0	0	2	6	0	0	0	0	-97.6387
	25	0	2	0	0	0	0	0	0	1	-97.5405
	20	20	2	3	2	0	0	0	0	0	-97.3169
	21	12	8	12	2	0	2	0	0	0	-96.9303
	53	24	2	2	1	0	0	0	0	0	-96.8698
	12	12	0	0	2	4	0	0	1	0	-96.6942
	21	18	2	2	1	2	1	0	0	0	-96.6942
	31	18	4	1	0	0	0	0	0	2	-96.6942
	16	12	9	0	0	0	0	0	0	0	-96.4581
	24	18	2	0	0	0	0	0	0	0	-96.4319
	30	15	2	0	0	0	0	0	0	0	-96.4226
	17	5	4	3	0	0	0	0	0	2	-96.199
	43	30	0	0	0	0	0	0	0	0	-96.199
	17	6	2	2	0	0	0	1	0	1	-95.9858
	27	21	6	2	0	0	0	0	0	0	-95.9858
	18	17	0	0	0	2	0	0	0	0	-95.9754
	25	16	1	0	0	0	0	0	0	1	-95.9754
	15	12	0	0	0	0	0	1	1	0	-95.7518
	24	0	1	0	0	0	0	0	0	0	-95.7518
	40	18	0	0	0	0	0	1	0	0	-95.7518
	21	18	6	0	0	0	0	0	0	0	-95.7497
	19	17	0	0	0	0	0	0	0	0	-95.4164
	14	12	0	0	1	0	0	0	0	0	-95.0811
	23	12	7	2	0	0	0	0	0	0	-95.0413
	26	9	2	0	0	0	0	0	0	0	-95.0413
	7	0	2	2	0	0	0	0	0	1	-95.0413
	14	12	8	12	2	0	1	0	0	0	-94.5691
	17	12	0	0	0	1	0	1	1	0	-94.5221
	21	17	0	0	0	2	0	1	0	0	-94.3329
	30	18	4	2	0	0	0	0	0	2	-94.0968
	38	12	0	0	0	0	0	2	0	0	-94.0749
	15	16	0	0	0	3	0	0	0	0	-93.9631
	29	18	4	1	0	0	0	1	0	2	-93.9631
	30	12	8	12	2	0	2	0	0	0	-93.9631
	14	12	2	2	0	1	0	0	0	0	-93.8513
	17	17	0	0	0	4	0	0	0	0	-93.6277
	22	12	8	12	2	0	2	0	0	0	-93.6246
	31	23	0	0	0	0	0	2	0	0	-93.6246
	23	5	4	1	0	0	0	0	0	1	-93.5159
	25	21	1	0	0	0	0	1	0	1	-93.5159
	21	17	5	3	0	2	0	0	0	1	-93.4041
	44	26	0	0	0	0	0	0	0	0	-93.4041
	20	6	5	6	1	0	4	0	0	3	-93.3884
	42	24	22	0	4	0	0	0	0	7	-92.9162
	8	0	2	2	0	0	0	0	0	1	-92.8452
	23	12	7	2	0	0	0	0	0	0	-92.7334
	13	12	0	0	0	0	0	0	1	0	-92.68
	30	23	0	0	0	2	0	2	0	0	-92.68
	7	6	0	0	0	0	0	0	0	0	-92.5098
	21	18	6	0	0	0	0	0	0	0	-92.4439
	27	23	5	2	0	2	0	0	0	1	-92.2862
	20	12	5	3	0	0	0	0	0	1	-91.9717
	13	14	0	0	0	0	0	1	0	0	-91.6154
	19	16	2	0	0	0	0	0	0	0	-91.6154
	17	15	0	0	0	1	0	0	0	0	-91.5036
	8	6	0	0	2	0	0	0	0	0	-91.4994
	20	10	7	2	0	0	0	0	0	1	-91.1683
	66	26	16	1	0	0	0	0	0	4	-90.8329
	19	12	6	3	1	1	0	0	0	2	-90.7689
	14	12	0	0	1	0	0	0	0	0	-90.7211
Average values:->	22.44	14.58	3.66	1.58	0.67	0.42	0.15	0.22	0.04	0.6	-96.3994

## Sheet: Table3
	Table 3. Least active 100 compounds containing top 10 negatively correlated fingerprints and their maximum response values.
	SubFPC307	SubFPC274	SubFPC287	SubFPC137	SubFPC169	SubFPC171	SubFPC136	SubFPC33	SubFPC21	SubFPC303	Maximum response
	5	0	0	0	0	0	0	0	0	0	3.29793
	7	6	2	0	2	0	0	0	0	0	3.29793
	7	6	2	3	1	0	1	0	0	0	3.29793
	8	6	0	0	0	0	0	0	0	0	3.40973
	11	6	0	0	0	0	0	0	0	0	3.42385
	12	6	2	2	0	0	0	0	0	0	3.42385
	17	12	8	0	0	0	0	0	0	0	3.42385
	18	0	0	0	0	0	0	0	0	0	3.42385
	3	0	0	0	0	0	0	0	0	0	3.42385
	7	6	0	0	0	0	0	0	0	0	3.42385
	13	11	2	0	0	0	0	0	0	0	3.46562
	12	10	4	0	0	0	0	0	0	0	3.52152
	45	12	0	0	1	0	0	0	0	0	3.52152
	5	5	2	0	0	0	0	0	0	0	3.52152
	4	6	2	0	2	0	0	0	0	0	3.61418
	14	6	0	0	0	0	0	0	0	0	3.63332
	9	0	1	1	0	0	0	0	0	1	3.63332
	10	6	4	0	0	0	0	0	0	0	3.65998
	12	6	4	0	0	0	0	0	0	0	3.65998
	2	0	0	0	0	0	0	0	0	0	3.65998
	29	0	1	2	0	0	0	0	0	1	3.65998
	7	6	0	0	0	0	0	0	0	0	3.65998
	8	6	2	2	0	0	0	0	0	0	3.65998
	9	6	2	2	0	0	0	0	0	0	3.65998
	9	6	3	1	0	0	0	0	0	1	3.65998
	12	0	0	0	0	0	0	0	0	0	3.74511
	14	12	0	0	2	0	0	0	0	0	3.74511
	16	12	4	0	0	0	0	0	0	0	3.74511
	14	12	0	0	0	0	0	0	0	0	3.77804
	15	12	2	0	0	0	0	0	0	0	3.77804
	17	6	1	2	0	0	0	0	0	1	3.80101
	20	12	14	6	0	0	0	0	0	2	3.8569
	24	0	1	2	0	0	0	0	0	1	3.8569
	61	15	2	2	0	0	0	0	0	0	3.8569
	11	9	0	0	0	0	0	0	0	0	3.8961
	14	12	2	2	0	0	0	0	0	0	3.8961
	17	12	6	2	0	1	0	0	0	0	3.8961
	3	0	0	0	0	0	0	0	0	0	3.8961
	3	0	0	0	0	0	0	0	0	0	3.8961
	6	6	2	1	0	0	0	0	0	0	3.8961
	9	6	2	2	0	0	0	0	0	0	3.8961
	15	12	0	0	0	1	0	0	0	0	3.9687
	17	0	2	3	0	0	0	0	0	2	3.9687
	12	10	0	0	0	0	0	0	0	0	4.01417
	15	11	0	0	0	0	0	0	0	0	4.01417
	8	6	0	0	0	0	0	0	0	0	4.01417
	9	6	0	0	0	0	0	0	0	0	4.01417
	6	0	0	0	0	0	0	0	0	0	4.08049
	10	6	0	0	0	0	0	0	0	0	4.13223
	11	0	1	2	0	0	0	0	0	1	4.13223
	11	6	4	1	0	0	0	0	0	1	4.13223
	14	6	4	2	0	0	0	1	0	2	4.13223
	15	0	2	3	0	0	0	0	0	2	4.13223
	2	0	0	0	0	0	0	0	0	0	4.13223
	7	0	2	0	0	0	0	0	0	1	4.13223
	8	0	1	0	0	0	0	0	0	1	4.13223
	8	6	2	2	0	0	0	0	0	0	4.13223
	9	6	2	2	0	0	0	0	0	0	4.13223
	10	0	1	1	0	0	0	0	0	1	4.13639
	8	6	0	0	0	0	0	0	0	0	4.19229
	19	12	4	2	0	0	0	2	0	2	4.24818
	9	6	0	0	0	0	0	0	0	0	4.24818
	10	6	2	3	0	0	0	0	0	0	4.25029
	8	6	2	0	0	0	0	0	0	0	4.25029
	14	16	4	0	0	1	0	0	0	0	4.30408
	16	12	2	3	0	0	0	0	0	0	4.30408
	3	0	0	0	0	0	0	0	0	0	4.30408
	10	6	0	0	0	0	0	0	0	0	4.36836
	15	6	0	0	0	0	0	0	0	0	4.36836
	16	12	4	0	0	0	0	0	0	0	4.36836
	16	16	4	0	0	0	0	0	0	0	4.36836
	16	17	0	0	0	0	0	0	0	0	4.36836
	24	0	10	0	0	0	0	0	0	0	4.36836
	3	0	0	0	0	0	0	0	0	0	4.36836
	7	6	2	0	0	0	0	0	0	0	4.36836
	9	6	6	3	0	0	0	0	0	0	4.36836
	8	0	0	0	0	0	0	0	0	0	4.41587
	9	6	1	0	0	1	0	0	0	0	4.48642
	13	14	0	0	0	0	0	0	0	0	4.52767
	14	10	0	0	0	0	0	0	0	0	4.52767
	14	12	0	0	0	0	0	0	0	0	4.52767
	3	0	0	0	0	0	0	0	0	0	4.52767
	9	6	0	0	0	0	0	0	0	0	4.52767
	10	6	2	2	0	0	0	0	0	0	4.60449
	12	6	6	2	0	0	0	0	0	0	4.60449
	7	6	2	2	1	0	1	0	0	0	4.60449
	15	12	4	0	0	0	0	0	0	0	4.63946
	12	12	4	0	0	0	0	0	0	0	4.72255
	10	6	0	0	0	0	0	0	0	0	4.75126
	22	0	0	0	0	0	0	0	0	0	4.75126
	3	0	0	0	0	0	0	0	0	0	4.75126
	19	11	1	2	1	0	0	0	0	1	4.80715
	11	11	0	0	0	0	0	0	0	0	4.84061
	13	0	1	2	0	0	0	0	0	1	4.84061
	6	5	2	0	0	0	0	0	0	0	4.84061
	10	0	4	1	0	0	0	0	0	2	4.86305
	15	6	0	0	0	0	0	0	0	0	4.86305
	6	6	0	0	1	0	0	0	0	0	4.86305
	8	6	4	0	0	0	0	0	0	0	4.86305
	16	0	2	3	0	0	0	0	0	2	4.97485
Average values:->	11.94	6.09	1.71	0.73	0.11	0.04	0.02	0.03	0	0.26	4.09149

## Sheet: Table4
Table 4. Top 10 negatively correlated fingerprints and their average values for highly active and least active compounds.
Fingerprint	Highly active compounds (n=100)	Least active compounds (n=100)
SubFPC307	22.44	11.94
SubFPC274	14.58	6.09
SubFPC287	3.66	1.71
SubFPC137	1.58	0.73
SubFPC169	0.67	0.11
SubFPC171	0.42	0.04
SubFPC136	0.15	0.02
SubFPC33	0.22	0.03
SubFPC21	0.04	0
SubFPC303	0.6	0.26
Maximum response	-96.3994	4.09149
