# Supplementary material for: ASCoVPred: a machine learning-based platform for quantitative prediction of anti-SARS-CoV-2 activity and human cell toxicity of molecules
Source: Research Square preprint supplement (doi:10.21203/rs.3.rs-967196/v1), 2021-10-13
Supplement: Supplementary file 17 [file ece2962d793c25be417d7873.xlsx]

## Sheet: Assay-2-ML-results
Table 1. Summary of whole descriptors/fingerprints-based datasets.
Sr.No.	Descriptors / FPs Type	Total number of descriptors / FPs	Unique records	Training set molecules	Validation set molecules	Maximum descriptors allowed	Model building status
1	1D & 2D	1444	3235	2588	647	517.6	No
2	Fingerprinter	1024	3401	2721	680	544.2	No
3	ExtendedFingerprinter	1024	3401	2721	680	544.2	No
4	EStateFingerprinter	79	3396	2717	679	543.4	Yes
5	GraphOnlyFingerprinter	1024	3401	2721	680	544.2	No
6	MACCSFingerprinter	166	3399	2719	680	543.8	Yes
7	PubchemFingerprinter	881	3400	2720	680	544	No
8	SubstructureFingerprinter	307	3396	2717	679	543.4	Yes
9	SubstructureFingerprintCount	307	3399	2719	680	543.8	Yes
10	KlekotaRothFingerprinter	4860	3400	2720	680	544	No
11	KlekotaRothFingerprintCount	4860	3400	2720	680	544	No
12	AtomPairs2DFingerprinter	780	3394	2715	679	543	No
13	AtomPairs2DFingerprintCount	780	3401	2721	680	544.2	No
Table 2. Summary of selected descriptors/fingerprints-based datasets.
Sr.No.	Descriptors / FPs Type	Number of descriptors / FPs after feature selection	Unique records	Training set molecules	Validation set molecules	Maximum descriptors allowed	Model building status
1	1D & 2D	50	3235	2588	647	517.6	Yes
2	Fingerprinter	33	3370	2696	674	539.2	Yes
3	ExtendedFingerprinter	32	3382	2706	676	541.2	Yes
4	EStateFingerprinter	15	3251	2601	650	520.2	Yes
5	GraphOnlyFingerprinter	23	3318	2654	664	530.8	Yes
6	MACCSFingerprinter	14	3281	2625	656	525	Yes
7	PubchemFingerprinter	47	3291	2633	658	526.6	Yes
8	SubstructureFingerprinter	45	3299	2639	660	527.8	Yes
9	SubstructureFingerprintCount	71	3385	2708	677	541.6	Yes
10	KlekotaRothFingerprinter	368	3319	2655	664	531	Yes
11	KlekotaRothFingerprintCount	398	3303	2642	661	528.4	Yes
12	AtomPairs2DFingerprinter	56	3240	2592	648	518.4	Yes
13	AtomPairs2DFingerprintCount	66	3339	2671	668	534.2	Yes
Table 3. Best five models performance with whole and selected descriptors/fingerprints-based datasets.
	Descriptors/FPs Type	Unique records	Training Set Molecules	Validation Set Molecules	Number of descriptors / FPs used	R	MAE	RMSE	Technique Used
	EStateFingerprinter	3396	2717	679	79	0.49	17.46	23.72	weka.classifiers.meta.RandomCommittee (RandomForest)
		3396	2717	679	79	0.48	17.61	23.67	weka.classifiers.meta.Bagging (RandomForest)
		3396	2717	679	79	0.48	17.55	23.81	weka.classifiers.trees.RandomForest
		3396	2717	679	79	0.48	17.61	23.83	weka.classifiers.meta.RegressionByDiscretization (RandomForest)
		3396	2717	679	79	0.47	18.66	24.08	weka.classifiers.meta.RandomSubSpace (RandomForest)
	Descriptors/FPs Type	Unique records	Training Set Molecules	Validation Set Molecules	Number of descriptors / FPs used	R	MAE	RMSE	Technique Used
	MACCSFingerprinter	3399	2719	680	166	0.65	15.4	20.7	weka.classifiers.meta.RandomCommittee (RandomForest)
		3399	2719	680	166	0.65	15.45	20.79	weka.classifiers.trees.RandomForest
		3399	2719	680	166	0.64	15.79	21.05	weka.classifiers.meta.Bagging (RandomForest)
		3399	2719	680	166	0.64	15.05	20.69	weka.classifiers.meta.AdditiveRegression (RandomForest)
		3399	2719	680	166	0.64	15.81	21.08	weka.classifiers.meta.RegressionByDiscretization (RandomForest)
	Descriptors/FPs Type	Unique records	Training Set Molecules	Validation Set Molecules	Number of descriptors / FPs used	R	MAE	RMSE	Technique Used
	SubstructureFingerprinter	3396	2717	679	307	0.61	15.74	21.45	weka.classifiers.meta.Bagging (RandomForest)
		3396	2717	679	307	0.61	15.94	21.53	weka.classifiers.meta.RandomSubSpace (RandomForest)
		3396	2717	679	307	0.61	15.58	21.42	weka.classifiers.meta.RandomCommittee (RandomForest)
		3396	2717	679	307	0.61	15.68	21.5	weka.classifiers.trees.RandomForest
		3396	2717	679	307	0.6	15.79	21.6	weka.classifiers.meta.RegressionByDiscretization (RandomForest)
	Descriptors/FPs Type	Unique records	Training Set Molecules	Validation Set Molecules	Number of descriptors / FPs used	R	MAE	RMSE	Technique Used
	SubstructureFingerprintCount	3399	2719	680	307	0.72	13.94	19.14	weka.classifiers.meta.RandomCommittee (RandomForest)
		3399	2719	680	307	0.72	13.52	18.88	weka.classifiers.meta.AdditiveRegression (RandomForest)
		Validation dataset performance		680	307	0.69	15.27	21.88
		3399	2719	680	307	0.71	14.28	19.47	weka.classifiers.meta.Bagging (RandomForest)
		3399	2719	680	307	0.71	14.36	19.47	weka.classifiers.meta.RandomSubSpace (RandomForest)
		3399	2719	680	307	0.71	14.01	19.25	weka.classifiers.trees.RandomForest
	Descriptors/FPs Type	Unique records	Training Set Molecules	Validation Set Molecules	Number of descriptors / FPs used	R	MAE	RMSE	Technique Used
	1D & 2D	3235	2588	647	50	0.72	13.51	18.83	weka.classifiers.meta.AdditiveRegression (RandomForest)
	Deployed on Webserver	Validation dataset performance		647	50	0.74	14.44	20.5
		3235	2588	647	50	0.72	13.86	19.03	weka.classifiers.meta.RandomCommittee (RandomForest)
		3235	2588	647	50	0.71	14.13	19.25	weka.classifiers.meta.Bagging (RandomForest)
		3235	2588	647	50	0.71	13.95	19.16	weka.classifiers.trees.RandomForest
		3235	2588	647	50	0.71	14.49	19.53	weka.classifiers.meta.RandomSubSpace (RandomForest)
	Descriptors/FPs Type	Unique records	Training Set Molecules	Validation Set Molecules	Number of descriptors / FPs used	R	MAE	RMSE	Technique Used
	Fingerprinter	3370	2696	674	33	0.62	15.61	21.13	weka.classifiers.meta.RandomSubSpace (RandomForest)
		3370	2696	674	33	0.61	15.6	21.26	weka.classifiers.meta.Bagging (RandomForest)
		3370	2696	674	33	0.61	15.56	21.37	weka.classifiers.meta.RandomCommittee (RandomForest)
		3370	2696	674	33	0.61	16.34	21.62	weka.classifiers.meta.RandomSubSpace (REPTree)
		3370	2696	674	33	0.61	15.59	21.45	weka.classifiers.trees.RandomForest
	Descriptors/FPs Type	Unique records	Training Set Molecules	Validation Set Molecules	Number of descriptors / FPs used	R	MAE	RMSE	Technique Used
	ExtendedFingerprinter	3382	2706	676	32	0.63	15.37	20.98	weka.classifiers.meta.RandomSubSpace (RandomForest)
		3382	2706	676	32	0.62	15.49	21.15	weka.classifiers.meta.Bagging (RandomForest)
		3382	2706	676	32	0.62	15.36	21.17	weka.classifiers.meta.RandomCommittee (RandomForest)
		3382	2706	676	32	0.62	15.51	21.26	weka.classifiers.meta.RegressionByDiscretization (RandomForest)
		3382	2706	676	32	0.62	15.41	21.29	weka.classifiers.trees.RandomForest
	Descriptors/FPs Type	Unique records	Training Set Molecules	Validation Set Molecules	Number of descriptors / FPs used	R	MAE	RMSE	Technique Used
	EStateFingerprinter	3251	2601	650	15	0.32	20.01	25.62	weka.classifiers.functions.LinearRegression (No attribute selection)
		3251	2601	650	15	0.31	20.04	25.64	weka.classifiers.functions.LinearRegression (M5 method)
		3251	2601	650	15	0.31	20.04	25.64	weka.classifiers.functions.LinearRegression (Greedy method)
		3251	2601	650	15	0.31	20.23	25.74	weka.classifiers.lazy.KStar (Normalize over the attributes)
		3251	2601	650	15	0.31	20.23	25.74	weka.classifiers.lazy.KStar (Average column entropy curves)
	Descriptors/FPs Type	Unique records	Training Set Molecules	Validation Set Molecules	Number of descriptors / FPs used	R	MAE	RMSE	Technique Used
	GraphOnlyFingerprinter	3318	2654	664	23	0.48	17.76	23.65	weka.classifiers.meta.Bagging (REPTree)
		3318	2654	664	23	0.48	17.75	23.65	weka.classifiers.lazy.KStar (Normalize over the attributes)
		3318	2654	664	23	0.48	17.75	23.65	weka.classifiers.lazy.KStar (Average column entropy curves)
		3318	2654	664	23	0.48	17.74	23.76	weka.classifiers.meta.Bagging (RandomForest)
		3318	2654	664	23	0.48	17.77	23.78	weka.classifiers.meta.AdditiveRegression (REPTree)
	Descriptors/FPs Type	Unique records	Training Set Molecules	Validation Set Molecules	Number of descriptors / FPs used	R	MAE	RMSE	Technique Used
	MACCSFingerprinter	3281	2625	656	14	0.5	17.36	23.47	weka.classifiers.meta.Bagging (RandomForest)
		3281	2625	656	14	0.5	17.47	23.45	weka.classifiers.meta.Bagging (REPTree)
		3281	2625	656	14	0.49	17.36	23.53	weka.classifiers.meta.Bagging (RandomTree)
		3281	2625	656	14	0.49	17.42	23.5	weka.classifiers.functions.GaussianProcesses (Puk)
		3281	2625	656	14	0.49	17.74	23.54	weka.classifiers.lazy.KStar (Normalize over the attributes)
	Descriptors/FPs Type	Unique records	Training Set Molecules	Validation Set Molecules	Number of descriptors / FPs used	R	MAE	RMSE	Technique Used
	PubchemFingerprinter	3291	2633	658	47	0.58	16.71	22.27	weka.classifiers.meta.RandomSubSpace (RandomForest)
		3291	2633	658	47	0.58	15.72	22.16	weka.classifiers.lazy.KStar (Normalize over the attributes)
		3291	2633	658	47	0.58	15.72	22.16	weka.classifiers.lazy.KStar (Average column entropy curves)
		3291	2633	658	47	0.57	16.71	22.28	weka.classifiers.meta.RandomSubSpace (RandomTree)
		3291	2633	658	47	0.57	15.03	22.83	weka.classifiers.functions.SMOreg (NormalizedPolyKernel)
	Descriptors/FPs Type	Unique records	Training Set Molecules	Validation Set Molecules	Number of descriptors / FPs used	R	MAE	RMSE	Technique Used
	SubstructureFingerprinter	3299	2639	660	45	0.5	17.8	23.39	weka.classifiers.functions.LinearRegression (No attribute selection)
		3299	2639	660	45	0.49	17.87	23.49	weka.classifiers.functions.LinearRegression (M5 method)
		3299	2639	660	45	0.49	17.87	23.49	weka.classifiers.functions.LinearRegression (Greedy method)
		3299	2639	660	45	0.49	18.7	23.93	weka.classifiers.meta.RandomSubSpace (RandomForest)
		3299	2639	660	45	0.49	18.67	23.91	weka.classifiers.meta.RandomSubSpace (RandomTree)
	Descriptors/FPs Type	Unique records	Training Set Molecules	Validation Set Molecules	Number of descriptors / FPs used	R	MAE	RMSE	Technique Used
	SubstructureFingerprintCount	3385	2708	677	71	0.66	15.17	20.48	weka.classifiers.meta.RandomSubSpace (RandomForest)
		3385	2708	677	71	0.66	14.41	20.26	weka.classifiers.meta.Bagging (RandomForest)
		3385	2708	677	71	0.65	14.41	20.47	weka.classifiers.meta.RandomCommittee (RandomForest)
		3385	2708	677	71	0.65	14.95	20.48	weka.classifiers.functions.GaussianProcesses (Puk)
		3385	2708	677	71	0.65	14.43	20.48	weka.classifiers.trees.RandomForest
	Descriptors/FPs Type	Unique records	Training Set Molecules	Validation Set Molecules	Number of descriptors / FPs used	R	MAE	RMSE	Technique Used
	KlekotaRothFingerprinter	3319	2655	664	368	0.61	16.54	21.92	weka.classifiers.meta.RandomSubSpace (RandomForest)
		3319	2655	664	368	0.61	15.57	21.43	weka.classifiers.functions.LinearRegression (No attribute selection)
		3319	2655	664	368	0.61	16.37	21.8	weka.classifiers.meta.RandomSubSpace (RandomTree)
		3319	2655	664	368	0.6	15.34	22.45	weka.classifiers.functions.SMOreg (RBFKernel)
		3319	2655	664	368	0.6	15.69	21.72	weka.classifiers.meta.Bagging (RandomForest)
	Descriptors/FPs Type	Unique records	Training Set Molecules	Validation Set Molecules	Number of descriptors / FPs used	R	MAE	RMSE	Technique Used
	KlekotaRothFingerprintCount	3303	2642	661	398	0.58	17.13	22.54	weka.classifiers.meta.RandomSubSpace (RandomForest)
		3303	2642	661	398	0.57	18.05	22.51	weka.classifiers.functions.GaussianProcesses (PolyKernel)
		3303	2642	661	398	0.57	16.24	22.42	weka.classifiers.functions.LinearRegression (No attribute selection)
		3303	2642	661	398	0.57	16.79	22.41	weka.classifiers.functions.GaussianProcesses (Puk)
		3303	2642	661	398	0.56	17.05	22.57	weka.classifiers.meta.RandomSubSpace (RandomTree)
	Descriptors/FPs Type	Unique records	Training Set Molecules	Validation Set Molecules	Number of descriptors / FPs used	R	MAE	RMSE	Technique Used
	AtomPairs2DFingerprinter	3240	2592	648	56	0.39	19.31	24.99	weka.classifiers.meta.RandomSubSpace (RandomTree)
		3240	2592	648	56	0.38	19.36	25.01	weka.classifiers.meta.RandomSubSpace (RandomForest)
		3240	2592	648	56	0.38	19.12	25.02	weka.classifiers.functions.LinearRegression (M5 method)
		3240	2592	648	56	0.37	19.16	25.03	weka.classifiers.lazy.KStar (Normalize over the attributes)
		3240	2592	648	56	0.37	19.16	25.03	weka.classifiers.lazy.KStar (Average column entropy curves)
	Descriptors/FPs Type	Unique records	Training Set Molecules	Validation Set Molecules	Number of descriptors / FPs used	R	MAE	RMSE	Technique Used
	AtomPairs2DFingerprintCount	3339	2671	668	66	0.52	17	23.13	weka.classifiers.meta.Bagging (REPTree)
		3339	2671	668	66	0.51	17.21	23.15	weka.classifiers.functions.GaussianProcesses (Puk)
		3339	2671	668	66	0.51	16.84	23.31	weka.classifiers.lazy.KStar (Normalize over the attributes)
		3339	2671	668	66	0.51	16.84	23.31	weka.classifiers.lazy.KStar (Average column entropy curves)
		3339	2671	668	66	0.5	17.33	23.34	weka.classifiers.meta.RandomCommittee (REPTree)
