# Supplementary material for: ASCoVPred: a machine learning-based platform for quantitative prediction of anti-SARS-CoV-2 activity and human cell toxicity of molecules
Source: Research Square preprint supplement (doi:10.21203/rs.3.rs-967196/v1), 2021-10-13
Supplement: Supplementary file 18 [file f4555806bf81d0fdfc8a3bbc.xlsx]

## Sheet: Table1
Table 1. Top 10 negatively correlated fingerprints with maximum response.
Fingerprint	Pearson Correlation Coefficient (R) value
SubFPC120	-0.0538742
SubFPC85	-0.0474593
SubFPC302	-0.0466554
SubFPC109	-0.0402454
SubFPC3	-0.0353308
SubFPC296	-0.0287994
SubFPC4	-0.0270885
SubFPC297	-0.0262802
SubFPC299	-0.0262802
SubFPC300	-0.0259474

## Sheet: Table2
	Table 2. Highly active 100 compounds containing top 10 negatively correlated fingerprints and their maximum response values.
	SubFPC120	SubFPC85	SubFPC302	SubFPC109	SubFPC3	SubFPC296	SubFPC4	SubFPC297	SubFPC299	SubFPC300	Maximum response
	1	1	6	1	0	0	0	0	0	4	-96.6794
	0	2	11	0	0	0	0	0	0	9	-95.3053
	1	1	6	1	0	0	0	0	0	4	-90.9244
	0	2	11	0	0	0	0	0	0	9	-90.3226
	0	1	7	0	2	0	0	0	0	13	-89.9618
	0	2	12	0	0	0	0	0	0	10	-83.626
	2	0	4	2	0	0	0	0	0	5	-82.5214
	2	0	8	2	0	0	0	0	0	6	-77.315
	2	0	10	2	0	0	0	0	0	8	-74.5462
	2	0	10	2	0	0	0	0	0	8	-64.313
	0	1	6	0	0	0	0	0	0	4	-56.9847
	0	0	11	0	1	0	0	0	0	14	-48.1592
	0	3	19	0	0	0	0	0	0	18	-43.855
	0	0	11	0	0	0	1	0	0	14	-43.4018
	0	10	31	0	0	0	0	0	0	37	-39.7546
	0	0	3	0	0	0	0	0	0	5	-36.9847
	0	0	1	0	0	0	0	0	0	5	-35.5344
	0	0	2	0	0	1	0	0	0	7	-34.9393
	0	0	9	0	2	0	0	0	0	33	-32.54
	0	0	7	0	0	0	0	0	0	10	-32.2499
	0	0	2	0	0	2	0	1	1	2	-31.1688
	0	0	3	0	0	0	0	0	0	9	-29.4275
	0	0	4	0	2	0	0	0	0	16	-29.4093
	0	0	4	0	0	0	0	0	0	11	-29.2951
	0	0	7	0	5	0	0	0	0	48	-28.9699
	0	0	8	0	0	2	0	1	1	21	-28.3664
	0	1	19	0	0	0	0	0	0	16	-27.2901
	0	0	0	0	2	0	3	0	0	19	-27.0633
	0	0	5	0	0	0	0	0	0	6	-26.8468
	0	0	8	0	4	0	0	0	0	58	-26.1435
	0	0	4	0	0	0	0	0	0	11	-26.1416
	0	0	4	0	0	0	0	0	0	11	-25.3037
	0	0	1	0	2	0	3	0	0	23	-25.2427
	0	0	9	0	2	0	0	0	0	19	-25.1766
	0	0	3	0	0	1	0	1	1	10	-24.9894
	0	0	1	0	2	0	1	0	0	18	-24.7304
	0	0	8	0	0	0	0	0	0	15	-24.2983
	0	0	4	0	4	0	0	0	0	50	-23.9122
	0	0	5	0	0	0	0	0	0	19	-23.8793
	0	0	6	0	0	0	0	0	0	4	-23.855
	0	0	2	0	1	0	1	0	0	16	-23.7786
	0	0	2	0	0	0	0	0	0	20	-23.626
	0	0	12	0	2	0	1	0	0	27	-23.5542
	0	0	3	0	0	1	0	1	1	10	-23.466
	0	0	7	0	0	0	0	0	0	14	-23.1321
	0	0	2	0	2	0	2	0	0	23	-22.5573
	2	0	8	2	0	0	0	0	0	6	-22.4809
	0	0	2	0	3	0	0	0	0	18	-22.2879
	0	0	2	0	0	0	0	0	0	2	-22.2519
	0	1	5	0	4	0	0	0	0	37	-22.2016
	0	0	8	0	0	0	0	0	0	7	-22.1756
	0	0	6	0	0	0	0	0	0	6	-21.8702
	0	0	3	0	0	3	0	2	2	3	-21.3359
	0	0	7	0	0	0	0	0	0	11	-21.2819
	0	0	15	0	0	1	0	0	0	16	-21.1069
	0	0	6	0	0	0	0	0	0	4	-20.7683
	0	0	3	0	9	0	0	0	0	48	-20.1773
	0	0	7	0	0	0	0	0	0	11	-20.1145
	0	0	8	0	0	2	0	1	1	9	-20.0929
	0	0	5	0	5	0	1	0	0	26	-20.0382
	0	0	10	0	0	0	0	0	0	15	-20.0084
	0	0	13	0	1	2	0	1	1	14	-19.924
	0	0	12	0	0	0	0	0	0	16	-19.8215
	0	0	1	0	0	2	0	1	1	2	-19.7552
	0	0	6	0	0	0	0	0	0	4	-19.7552
	0	0	8	0	0	0	0	0	0	9	-19.5863
	0	0	4	0	1	0	0	0	0	13	-19.5224
	0	0	5	0	0	0	0	0	0	8	-19.4386
	0	0	2	0	0	0	0	0	0	3	-19.4175
	0	0	2	0	0	0	0	0	0	10	-19.3752
	0	0	2	0	0	2	0	1	1	8	-19.3009
	0	0	5	0	0	0	0	0	0	4	-19.2486
	0	0	15	0	2	0	0	0	0	33	-19.2265
	0	1	17	0	2	0	0	0	0	26	-19.2265
	0	4	21	0	0	0	0	0	0	25	-19.1521
	0	0	1	0	4	0	1	0	0	21	-18.929
	0	0	6	0	0	0	0	0	0	12	-18.8168
	0	0	6	0	0	0	0	0	0	7	-18.6845
	0	0	5	0	0	0	0	0	0	8	-18.6577
	0	0	1	0	0	2	0	1	1	1	-18.4083
	0	0	1	0	0	0	0	0	0	6	-18.4044
	0	0	3	0	0	0	2	0	0	8	-18.2061
	0	0	11	0	5	2	0	1	1	19	-18.1511
	0	0	6	0	0	0	1	0	0	6	-18.0667
	0	0	8	0	0	0	0	0	0	11	-18.0667
	0	0	7	0	0	0	0	0	0	7	-18.0364
	0	2	20	0	3	0	0	0	0	29	-18.0364
	0	0	5	0	3	0	2	0	0	33	-17.7629
	0	0	6	0	0	0	0	0	0	6	-17.5115
	0	0	8	0	0	0	0	0	0	15	-17.3913
	0	1	14	0	2	0	0	0	0	21	-17.2927
	0	0	1	0	1	0	5	0	0	23	-17.2225
	0	0	8	0	0	2	0	1	1	8	-17.138
	0	0	1	0	0	0	0	0	0	10	-17.0536
	0	0	5	0	0	0	0	0	0	8	-17.0536
	0	0	7	0	0	0	0	0	0	21	-17.0536
	0	0	8	0	0	0	0	0	0	12	-17.0088
	0	0	4	0	0	0	0	0	0	12	-16.925
	0	0	5	0	0	0	0	0	0	4	-16.8848
	0	0	6	0	3	0	1	0	0	28	-16.8848
Average values:->	0.12	0.33	6.79	0.12	0.81	0.25	0.25	0.13	0.13	14.49	-29.5613

## Sheet: Table3
	Table 3. Least active 100 compounds containing top 10 negatively correlated fingerprints and their maximum response values.
	SubFPC120	SubFPC85	SubFPC302	SubFPC109	SubFPC3	SubFPC296	SubFPC4	SubFPC297	SubFPC299	SubFPC300	Maximum response
	0	0	3	0	0	0	0	0	0	3	40.6079
	0	0	1	0	0	0	0	0	0	9	41.1144
	0	0	1	0	4	0	1	0	0	20	41.2832
	0	0	3	0	0	0	0	0	0	8	42.1275
	0	0	4	0	0	0	0	0	0	14	42.2137
	0	0	3	0	0	0	1	0	0	19	42.2462
	0	0	9	0	0	0	0	0	0	13	42.6925
	0	0	6	0	0	0	0	0	0	6	43.0561
	0	0	11	0	1	0	0	0	0	15	43.8825
	0	0	1	0	0	0	0	0	0	3	44.7446
	0	0	4	0	0	0	0	0	0	18	44.829
	0	0	8	0	0	0	0	0	0	11	45.1469
	0	0	7	0	2	0	0	0	0	16	45.2451
	0	0	4	0	0	0	0	0	0	2	45.2512
	0	0	0	0	0	0	0	0	0	1	46.9466
	0	0	3	0	0	0	0	0	0	8	47.3398
	0	0	2	0	0	0	0	0	0	13	47.6013
	0	0	3	0	0	0	0	0	0	10	48.5496
	0	0	10	0	0	0	0	0	0	14	49.4656
	0	0	4	0	1	0	0	0	0	6	49.9237
	0	0	10	0	0	0	1	0	0	12	50.0633
	0	0	7	0	0	0	0	0	0	7	50.1527
	0	0	3	0	0	0	0	0	0	12	50.687
	0	0	2	0	0	0	0	0	0	4	53.778
	0	0	2	0	0	0	0	0	0	7	54.7328
	0	0	2	0	1	0	0	0	0	12	55.382
	0	0	10	0	0	0	0	0	0	11	55.5509
	0	0	3	0	1	0	0	0	0	11	55.6341
	0	0	8	0	0	0	0	0	0	21	58.2524
	0	0	4	0	0	0	0	0	0	8	58.5901
	0	0	2	0	0	0	0	0	0	13	58.8323
	0	0	9	0	0	0	0	0	0	14	59.5017
	0	0	12	0	1	0	0	0	0	37	61.0384
	0	0	10	0	2	2	1	1	1	37	61.5842
	0	0	18	0	0	0	0	0	0	38	62.0515
	0	0	2	0	0	0	0	0	0	9	62.2536
	0	0	11	0	1	0	0	0	0	15	62.3892
	0	0	2	0	0	0	0	0	0	13	65.0189
	0	0	4	0	1	0	0	0	0	17	66.9394
	0	0	3	0	0	0	0	0	0	8	68.3703
	0	0	7	0	0	0	0	0	0	10	69.5652
	0	0	6	0	0	0	0	0	0	14	71.507
	0	0	5	0	0	0	0	0	0	17	74.3192
	0	0	4	0	0	0	0	0	0	7	75.1908
	0	0	7	1	0	0	0	0	0	20	75.7436
	0	0	10	0	1	0	0	0	0	22	80.2026
	0	0	2	0	0	0	0	0	0	13	81.9755
	0	0	3	0	0	2	0	1	1	13	81.9755
	0	0	2	0	0	0	0	0	0	3	82.6142
	0	0	4	0	0	2	0	2	2	2	84.4275
	0	0	24	0	0	0	0	0	0	35	85.0874
	0	0	2	0	0	0	0	0	0	9	88.7294
	0	0	6	0	0	0	0	0	0	19	89.9036
	0	0	14	0	0	0	0	0	0	12	90.7556
	0	0	4	0	0	0	0	0	0	5	91.2442
	0	0	3	0	0	0	0	0	0	15	92.6718
	0	0	5	0	0	0	0	0	0	9	97.2519
	0	0	3	0	0	0	0	0	0	12	109.845
	0	0	4	0	0	2	0	1	1	10	113.951
	0	0	9	0	0	0	0	0	0	15	119.122
	0	0	7	0	0	0	0	0	0	20	119.797
	0	0	4	0	0	0	0	0	0	10	125.201
	0	0	6	0	0	0	0	0	0	15	125.454
	0	0	5	0	0	0	0	0	0	0	125.649
	0	0	5	0	0	0	0	0	0	8	126.77
	0	0	2	0	0	0	0	0	0	4	139.087
	0	0	9	0	0	0	0	0	0	24	145.622
	0	0	13	0	1	0	0	0	0	51	151.952
	0	0	5	0	0	0	0	0	0	15	154.58
	0	0	10	0	1	0	0	0	0	22	154.918
	0	0	4	0	1	0	0	0	0	14	155.002
	0	0	6	0	1	0	0	0	0	12	157.352
	0	0	2	0	1	0	0	0	0	8	157.382
	0	0	7	0	0	0	0	0	0	10	163.927
	0	0	13	0	0	2	2	1	1	24	164.139
	0	0	5	0	1	0	0	0	0	10	164.711
	0	0	9	0	0	0	0	0	0	15	166.031
	0	0	5	0	0	0	0	0	0	13	167.405
	0	1	10	0	0	0	0	0	0	12	174.935
	0	0	1	0	0	0	0	0	0	14	185.496
	0	0	8	0	1	0	0	0	0	11	199.749
	0	1	3	0	0	0	0	0	0	5	244.829
	0	0	1	0	0	0	0	0	0	14	247.193
	0	0	1	0	0	0	0	0	0	2	257.345
	0	0	3	0	0	2	0	1	1	3	295.652
	0	0	8	0	0	0	0	0	0	9	302.807
	0	0	3	0	0	0	0	0	0	10	310.257
	0	0	14	0	2	0	0	0	0	30	329.193
	0	0	3	0	0	0	0	0	0	11	351.374
	0	0	6	0	1	0	1	0	0	16	361.418
	0	0	1	0	0	0	0	0	0	2	403.268
	0	0	3	0	0	0	0	0	0	15	410.229
	0	0	3	0	0	0	0	0	0	15	421.198
	0	0	2	0	0	0	0	0	0	4	470.534
	0	0	2	0	1	0	0	0	0	5	557.028
	0	0	0	0	0	0	0	0	0	3	721.527
	0	0	0	0	0	0	0	0	0	3	727.44
	0	0	0	0	0	0	0	0	0	3	779.008
	0	0	2	0	0	0	0	0	0	7	825.052
	0	0	6	0	0	0	0	0	0	15	1389.62
Average values:->	0	0.02	5.32	0.01	0.27	0.12	0.07	0.07	0.07	12.61	164.513

## Sheet: Table4
Table 4. Top 10 negatively correlated fingerprints and their average values for highly active and least active compounds.
Fingerprint	Highly active compounds (n=100)	Least active compounds (n=100)
SubFPC120	0.12	0
SubFPC85	0.33	0.02
SubFPC302	6.79	5.32
SubFPC109	0.12	0.01
SubFPC3	0.81	0.27
SubFPC296	0.25	0.12
SubFPC4	0.25	0.07
SubFPC297	0.13	0.07
SubFPC299	0.13	0.07
SubFPC300	14.49	12.61
Maximum response	-29.5613	164.513
