# Supplementary material for: ASCoVPred: a machine learning-based platform for quantitative prediction of anti-SARS-CoV-2 activity and human cell toxicity of molecules
Source: Research Square preprint supplement (doi:10.21203/rs.3.rs-967196/v1), 2021-10-13
Supplement: Supplementary file 20 [file 030c62049e3cbaac2bf10828.xlsx]

## Sheet: Assay-15-ML-results
Table 1. Summary of whole descriptors/fingerprints-based datasets.
Sr.No.	Descriptors / FPs Type	Total number of descriptors / FPs	Unique records	Training set molecules	Validation set molecules	Maximum descriptors allowed	Model building status
1	1D & 2D	1444	9080	7264	1816	1452.8	Yes
2	Fingerprinter	1024	9762	7810	1952	1562	Yes
3	ExtendedFingerprinter	1024	9762	7810	1952	1562	Yes
4	EStateFingerprinter	79	9715	7772	1943	1554.4	Yes
5	GraphOnlyFingerprinter	1024	9761	7809	1952	1561.8	Yes
6	MACCSFingerprinter	166	9754	7803	1951	1560.6	Yes
7	PubchemFingerprinter	881	9754	7803	1951	1560.6	Yes
8	SubstructureFingerprinter	307	9752	7802	1950	1560.4	Yes
9	SubstructureFingerprintCount	307	9754	7803	1951	1560.6	Yes
10	KlekotaRothFingerprinter	4860	9754	7803	1951	1560.6	No
11	KlekotaRothFingerprintCount	4860	9754	7803	1951	1560.6	No
12	AtomPairs2DFingerprinter	780	9670	7736	1934	1547.2	Yes
13	AtomPairs2DFingerprintCount	780	9762	7810	1952	1562	Yes
Table 2. Summary of selected descriptors/fingerprints-based datasets.
Sr.No.	Descriptors / FPs Type	Number of descriptors / FPs after feature selection	Unique records	Training set molecules	Validation set molecules	Maximum descriptors allowed	Model building status
1	1D & 2D	40	9080	7264	1816	1452.8	Yes
2	Fingerprinter	33	9758	7806	1952	1561.2	Yes
3	ExtendedFingerprinter	13	9732	7786	1946	1557.2	Yes
4	EStateFingerprinter	17	9202	7362	1840	1472.4	Yes
5	GraphOnlyFingerprinter	44	9719	7775	1944	1555	Yes
6	MACCSFingerprinter	19	9582	7666	1916	1533.2	Yes
7	PubchemFingerprinter	62	9601	7681	1920	1536.2	Yes
8	SubstructureFingerprinter	52	9453	7562	1891	1512.4	Yes
9	SubstructureFingerprintCount	85	9724	7779	1945	1555.8	Yes
10	KlekotaRothFingerprinter	365	9409	7527	1882	1505.4	Yes
11	KlekotaRothFingerprintCount	396	9361	7489	1872	1497.8	Yes
12	AtomPairs2DFingerprinter	78	9401	7521	1880	1504.2	Yes
13	AtomPairs2DFingerprintCount	99	9753	7802	1951	1560.4	Yes
Table 3. Best five models performance with whole and selected descriptors/fingerprints-based datasets.
	Descriptors/FPs Type	Unique records	Training Set Molecules	Validation Set Molecules	Number of descriptors / FPs used	R	MAE	RMSE	Technique Used
	1D & 2D	9080	7264	1816	1444	0.6559	13.1213	21.1286	weka.classifiers.meta.AdditiveRegression (RandomForest)
		Validation dataset performance		1816	1444	0.6494	14.1131	21.9302
		9080	7264	1816	1444	0.6518	13.894	21.4486	weka.classifiers.meta.RandomSubSpace (RandomForest)
		9080	7264	1816	1444	0.6505	13.9071	21.4706	weka.classifiers.meta.RandomCommittee (RandomForest)
		9080	7264	1816	1444	0.643	13.9778	21.6013	weka.classifiers.trees.RandomForest
		9080	7264	1816	1444	0.6405	14.0115	21.7207	weka.classifiers.meta.RegressionByDiscretization (RandomForest)
	Descriptors/FPs Type	Unique records	Training Set Molecules	Validation Set Molecules	Number of descriptors / FPs used	R	MAE	RMSE	Technique Used
	Fingerprinter	9762	7810	1952	1024	0.6377	13.3949	21.8427	weka.classifiers.functions.SMOreg (RBFKernel)
		9762	7810	1952	1024	0.6312	14.6153	22.3062	weka.classifiers.functions.GaussianProcesses (RBFKernel)
		9762	7810	1952	1024	0.6241	14.6341	22.2437	weka.classifiers.meta.RandomSubSpace (RandomForest)
		9762	7810	1952	1024	0.624	14.6599	22.2412	weka.classifiers.meta.RandomCommittee (RandomForest)
		9762	7810	1952	1024	0.6221	13.9253	22.2529	weka.classifiers.meta.AdditiveRegression (RandomForest)
	Descriptors/FPs Type	Unique records	Training Set Molecules	Validation Set Molecules	Number of descriptors / FPs used	R	MAE	RMSE	Technique Used
	ExtendedFingerprinter	9762	7810	1952	1024	0.6346	13.4327	21.9185	weka.classifiers.functions.SMOreg (RBFKernel)
		9762	7810	1952	1024	0.6294	14.6427	22.3395	weka.classifiers.functions.GaussianProcesses (RBFKernel)
		9762	7810	1952	1024	0.6237	14.7032	22.2618	weka.classifiers.meta.RandomCommittee (RandomForest)
		9762	7810	1952	1024	0.6232	14.7018	22.276	weka.classifiers.meta.RandomSubSpace (RandomForest)
		9762	7810	1952	1024	0.6201	14.0219	22.2931	weka.classifiers.meta.AdditiveRegression (RandomForest)
	Descriptors/FPs Type	Unique records	Training Set Molecules	Validation Set Molecules	Number of descriptors / FPs used	R	MAE	RMSE	Technique Used
	EStateFingerprinter	9715	7772	1943	79	0.4901	15.8458	24.7133	weka.classifiers.meta.RandomCommittee (RandomForest)
		9715	7772	1943	79	0.4879	15.8719	24.7674	weka.classifiers.trees.RandomForest
		9715	7772	1943	79	0.4836	16.3691	24.7543	weka.classifiers.functions.GaussianProcesses (Puk)
		9715	7772	1943	79	0.4815	16.1476	24.7773	weka.classifiers.meta.Bagging (RandomForest)
		9715	7772	1943	79	0.4777	15.9979	24.9219	weka.classifiers.meta.RegressionByDiscretization (RandomForest)
	Descriptors/FPs Type	Unique records	Training Set Molecules	Validation Set Molecules	Number of descriptors / FPs used	R	MAE	RMSE	Technique Used
	GraphOnlyFingerprinter	9761	7809	1952	1024	0.5926	14.8163	22.8542	weka.classifiers.meta.RandomSubSpace (RandomForest)
		9761	7809	1952	1024	0.5898	14.8068	22.8896	weka.classifiers.meta.RandomCommittee (RandomForest)
		9761	7809	1952	1024	0.5874	14.227	23.0864	weka.classifiers.meta.AdditiveRegression (RandomForest)
		9761	7809	1952	1024	0.5853	14.8522	22.9684	weka.classifiers.trees.RandomForest
		9761	7809	1952	1024	0.5772	14.9741	23.1365	weka.classifiers.meta.RegressionByDiscretization (RandomForest)
	Descriptors/FPs Type	Unique records	Training Set Molecules	Validation Set Molecules	Number of descriptors / FPs used	R	MAE	RMSE	Technique Used
	MACCSFingerprinter	9754	7803	1951	166	0.6404	14.1276	21.8597	weka.classifiers.meta.RandomCommittee (RandomForest)
		9754	7803	1951	166	0.6397	14.2409	21.9213	weka.classifiers.meta.RandomSubSpace (RandomForest)
		9754	7803	1951	166	0.6345	13.5148	21.9382	weka.classifiers.meta.AdditiveRegression (RandomForest)
		9754	7803	1951	166	0.6321	14.1788	22.0102	weka.classifiers.trees.RandomForest
		9754	7803	1951	166	0.629	14.3245	22.1113	weka.classifiers.meta.RegressionByDiscretization (RandomForest)
	Descriptors/FPs Type	Unique records	Training Set Molecules	Validation Set Molecules	Number of descriptors / FPs used	R	MAE	RMSE	Technique Used
	PubchemFingerprinter	9754	7803	1951	881	0.6409	13.1375	21.8058	weka.classifiers.meta.AdditiveRegression (RandomForest)
		9754	7803	1951	881	0.6405	13.7272	21.7975	weka.classifiers.meta.RandomCommittee (RandomForest)
		9754	7803	1951	881	0.6394	13.7688	21.8319	weka.classifiers.meta.RandomSubSpace (RandomForest)
		9754	7803	1951	881	0.6345	13.791	21.91	weka.classifiers.trees.RandomForest
		9754	7803	1951	881	0.6309	13.9423	22.0161	weka.classifiers.meta.RegressionByDiscretization (RandomForest)
	Descriptors/FPs Type	Unique records	Training Set Molecules	Validation Set Molecules	Number of descriptors / FPs used	R	MAE	RMSE	Technique Used
	SubstructureFingerprinter	9752	7802	1950	307	0.5769	14.4774	23.1124	weka.classifiers.trees.RandomForest
		9752	7802	1950	307	0.5747	14.5661	23.1555	weka.classifiers.meta.RegressionByDiscretization (RandomForest)
		9752	7802	1950	307	0.5737	14.0553	23.5243	weka.classifiers.meta.AdditiveRegression (RandomForest)
		9752	7802	1950	307	0.5702	14.938	23.2787	weka.classifiers.meta.Bagging (RandomForest)
		9752	7802	1950	307	0.5609	15.7219	23.753	weka.classifiers.functions.GaussianProcesses (Puk)
	Descriptors/FPs Type	Unique records	Training Set Molecules	Validation Set Molecules	Number of descriptors / FPs used	R	MAE	RMSE	Technique Used
	SubstructureFingerprintCount	9754	7803	1951	307	0.6521	13.8048	21.611	weka.classifiers.meta.RandomCommittee (RandomForest)
		9754	7803	1951	307	0.6486	13.1586	21.5711	weka.classifiers.meta.AdditiveRegression (RandomForest)
		9754	7803	1951	307	0.6462	13.8581	21.7133	weka.classifiers.trees.RandomForest
		9754	7803	1951	307	0.6459	14.0245	21.7952	weka.classifiers.meta.RandomSubSpace (RandomForest)
		9754	7803	1951	307	0.6419	14.0317	21.8493	weka.classifiers.meta.RegressionByDiscretization (RandomForest)
	Descriptors/FPs Type	Unique records	Training Set Molecules	Validation Set Molecules	Number of descriptors / FPs used	R	MAE	RMSE	Technique Used
	AtomPairs2DFingerprinter	9670	7736	1934	780	0.54	15.2456	23.7409	weka.classifiers.meta.RandomCommittee (RandomForest)
		9670	7736	1934	780	0.5371	15.461	23.8421	weka.classifiers.meta.RandomSubSpace (RandomForest)
		9670	7736	1934	780	0.5341	15.2943	23.8481	weka.classifiers.trees.RandomForest
		9670	7736	1934	780	0.5314	14.9063	24.1713	weka.classifiers.meta.AdditiveRegression (RandomForest)
		9670	7736	1934	780	0.5303	15.3406	23.9141	weka.classifiers.meta.RegressionByDiscretization (RandomForest)
	Descriptors/FPs Type	Unique records	Training Set Molecules	Validation Set Molecules	Number of descriptors / FPs used	R	MAE	RMSE	Technique Used
	AtomPairs2DFingerprintCount	9762	7810	1952	780	0.6191	14.2986	22.3485	weka.classifiers.meta.RandomCommittee (RandomForest)
		9762	7810	1952	780	0.6176	14.3443	22.3976	weka.classifiers.meta.RandomSubSpace (RandomForest)
		9762	7810	1952	780	0.6174	13.7175	22.3004	weka.classifiers.meta.AdditiveRegression (RandomForest)
		9762	7810	1952	780	0.614	14.3404	22.4367	weka.classifiers.trees.RandomForest
		9762	7810	1952	780	0.6097	14.5687	22.5684	weka.classifiers.meta.RegressionByDiscretization (RandomForest)
	Descriptors/FPs Type	Unique records	Training Set Molecules	Validation Set Molecules	Number of descriptors / FPs used	R	MAE	RMSE	Technique Used
	1D & 2D	9080	7264	1816	40	0.6382	13.278	21.5565	weka.classifiers.meta.AdditiveRegression (RandomForest)
		9080	7264	1816	40	0.6371	13.934	21.696	weka.classifiers.meta.RandomCommittee (RandomForest)
		9080	7264	1816	40	0.6349	14.177	21.8582	weka.classifiers.meta.RandomSubSpace (RandomForest)
		9080	7264	1816	40	0.6312	13.9959	21.7955	weka.classifiers.trees.RandomForest
		9080	7264	1816	40	0.6283	14.0696	21.9209	weka.classifiers.meta.RegressionByDiscretization (RandomForest)
	Descriptors/FPs Type	Unique records	Training Set Molecules	Validation Set Molecules	Number of descriptors / FPs used	R	MAE	RMSE	Technique Used
	Fingerprinter	9758	7806	1952	33	0.5828	14.7685	23.0385	weka.classifiers.meta.RandomCommittee (RandomForest)
		9758	7806	1952	33	0.5786	14.7991	23.1346	weka.classifiers.trees.RandomForest
		9758	7806	1952	33	0.5772	14.837	23.1437	weka.classifiers.meta.RegressionByDiscretization (RandomForest)
		9758	7806	1952	33	0.5751	14.4455	23.5813	weka.classifiers.meta.AdditiveRegression (RandomForest)
		9758	7806	1952	33	0.5713	15.3147	23.3733	weka.classifiers.functions.GaussianProcesses (Puk)
	Descriptors/FPs Type	Unique records	Training Set Molecules	Validation Set Molecules	Number of descriptors / FPs used	R	MAE	RMSE	Technique Used
	ExtendedFingerprinter	9732	7786	1946	13	0.4573	16.1645	25.1208	weka.classifiers.lazy.KStar (Normalize over the attributes)
		9732	7786	1946	13	0.4573	16.1645	25.1208	weka.classifiers.lazy.KStar (Average column entropy curves)
		9732	7786	1946	13	0.4504	16.2052	25.3053	weka.classifiers.functions.GaussianProcesses (Puk)
		9732	7786	1946	13	0.4341	16.2877	25.7639	weka.classifiers.meta.Bagging (RandomForest)
		9732	7786	1946	13	0.4329	16.2799	25.9542	weka.classifiers.meta.RandomCommittee (RandomForest)
	Descriptors/FPs Type	Unique records	Training Set Molecules	Validation Set Molecules	Number of descriptors / FPs used	R	MAE	RMSE	Technique Used
	EStateFingerprinter	9202	7362	1840	17	0.2777	18.1215	26.9991	weka.classifiers.meta.RandomizableFilteredClassifier (KStar)
		9202	7362	1840	17	0.2769	18.1617	27.0084	weka.classifiers.functions.GaussianProcesses (Puk)
		9202	7362	1840	17	0.2768	18.1067	27.0229	weka.classifiers.meta.Bagging (RandomTree)
		9202	7362	1840	17	0.2764	18.1419	27.0212	weka.classifiers.trees.RandomForest
		9202	7362	1840	17	0.2764	18.1336	27.0236	weka.classifiers.lazy.IBk
	Descriptors/FPs Type	Unique records	Training Set Molecules	Validation Set Molecules	Number of descriptors / FPs used	R	MAE	RMSE	Technique Used
	GraphOnlyFingerprinter	9719	7775	1944	44	0.4405	16.6361	25.3648	weka.classifiers.functions.GaussianProcesses (Puk)
		9719	7775	1944	44	0.4394	16.3604	25.5642	weka.classifiers.meta.RandomCommittee (RandomForest)
		9719	7775	1944	44	0.4385	16.375	25.5908	weka.classifiers.trees.RandomForest
		9719	7775	1944	44	0.438	16.9045	25.4489	weka.classifiers.meta.RandomSubSpace (RandomForest)
		9719	7775	1944	44	0.4375	16.5502	25.502	weka.classifiers.meta.Bagging (RandomForest)
	Descriptors/FPs Type	Unique records	Training Set Molecules	Validation Set Molecules	Number of descriptors / FPs used	R	MAE	RMSE	Technique Used
	MACCSFingerprinter	9582	7666	1916	19	0.4011	17.2288	25.8906	weka.classifiers.lazy.KStar (Normalize over the attributes)
		9582	7666	1916	19	0.4011	17.2288	25.8906	weka.classifiers.lazy.KStar (Average column entropy curves)
		9582	7666	1916	19	0.3981	17.0916	25.9074	weka.classifiers.functions.GaussianProcesses (Puk)
		9582	7666	1916	19	0.3951	17.0321	26.0357	weka.classifiers.meta.RandomCommittee (RandomForest)
		9582	7666	1916	19	0.3939	17.0364	26.0482	weka.classifiers.trees.RandomForest
	Descriptors/FPs Type	Unique records	Training Set Molecules	Validation Set Molecules	Number of descriptors / FPs used	R	MAE	RMSE	Technique Used
	PubchemFingerprinter	9601	7681	1920	62	0.4748	15.9803	24.8562	weka.classifiers.functions.GaussianProcesses (Puk)
		9601	7681	1920	62	0.473	15.4265	24.9167	weka.classifiers.lazy.KStar (Normalize over the attributes)
		9601	7681	1920	62	0.473	15.4265	24.9167	weka.classifiers.lazy.KStar (Average column entropy curves)
		9601	7681	1920	62	0.4687	15.7252	25.1725	weka.classifiers.meta.RandomCommittee (RandomForest)
		9601	7681	1920	62	0.4681	15.8172	25.07	weka.classifiers.meta.Bagging (RandomForest)
	Descriptors/FPs Type	Unique records	Training Set Molecules	Validation Set Molecules	Number of descriptors / FPs used	R	MAE	RMSE	Technique Used
	SubstructureFingerprinter	9453	7562	1891	52	0.3427	17.6753	26.4763	weka.classifiers.functions.GaussianProcesses (Puk)
		9453	7562	1891	52	0.3394	17.8501	26.5021	weka.classifiers.functions.GaussianProcesses (NormalizedPolyKernel)
		9453	7562	1891	52	0.338	17.6106	26.5872	weka.classifiers.meta.RandomCommittee (RandomForest)
		9453	7562	1891	52	0.3379	17.7847	26.5178	weka.classifiers.meta.Bagging (REPTree)
		9453	7562	1891	52	0.3378	17.6512	26.5684	weka.classifiers.meta.Bagging (RandomForest)
	Descriptors/FPs Type	Unique records	Training Set Molecules	Validation Set Molecules	Number of descriptors / FPs used	R	MAE	RMSE	Technique Used
	SubstructureFingerprintCount	9724	7779	1945	85	0.455	16.0972	25.1494	weka.classifiers.lazy.KStar (Normalize over the attributes)
		9724	7779	1945	85	0.455	16.0972	25.1494	weka.classifiers.lazy.KStar (Average column entropy curves)
		9724	7779	1945	85	0.4404	17.0935	25.4854	weka.classifiers.meta.RandomSubSpace (RandomForest)
		9724	7779	1945	85	0.4395	16.9478	25.4381	weka.classifiers.meta.RandomSubSpace (RandomTree)
		9724	7779	1945	85	0.4374	16.3086	25.6766	weka.classifiers.meta.Bagging (RandomForest)
	Descriptors/FPs Type	Unique records	Training Set Molecules	Validation Set Molecules	Number of descriptors / FPs used	R	MAE	RMSE	Technique Used
	KlekotaRothFingerprinter	9409	7527	1882	365	0.475	16.0047	24.8332	weka.classifiers.functions.GaussianProcesses (Puk)
		9409	7527	1882	365	0.4726	16.4787	25.0916	weka.classifiers.meta.RandomSubSpace (RandomForest)
		9409	7527	1882	365	0.4706	16.3687	25.0093	weka.classifiers.meta.RandomSubSpace (RandomTree)
		9409	7527	1882	365	0.4571	17.1157	25.0946	weka.classifiers.functions.GaussianProcesses (NormalizedPolyKernel)
		9409	7527	1882	365	0.4563	15.6071	25.1464	weka.classifiers.meta.RandomCommittee (RandomForest)
	Descriptors/FPs Type	Unique records	Training Set Molecules	Validation Set Molecules	Number of descriptors / FPs used	R	MAE	RMSE	Technique Used
	KlekotaRothFingerprintCount	9361	7489	1872	396	0.4588	16.2476	25.0928	weka.classifiers.functions.GaussianProcesses (Puk)
		9361	7489	1872	396	0.4552	16.8049	25.3434	weka.classifiers.meta.RandomSubSpace (RandomForest)
		9361	7489	1872	396	0.4483	16.7165	25.336	weka.classifiers.meta.RandomSubSpace (RandomTree)
		9361	7489	1872	396	0.448	15.8086	25.3311	weka.classifiers.trees.RandomForest
		9361	7489	1872	396	0.4479	15.8044	25.3321	weka.classifiers.meta.RandomCommittee (RandomForest)
	Descriptors/FPs Type	Unique records	Training Set Molecules	Validation Set Molecules	Number of descriptors / FPs used	R	MAE	RMSE	Technique Used
	AtomPairs2DFingerprinter	9401	7521	1880	78	0.3564	17.8798	26.4244	weka.classifiers.meta.RandomSubSpace (RandomForest)
		9401	7521	1880	78	0.3563	17.464	26.3529	weka.classifiers.lazy.KStar (Normalize over the attributes)
		9401	7521	1880	78	0.3563	17.464	26.3529	weka.classifiers.lazy.KStar (Average column entropy curves)
		9401	7521	1880	78	0.3544	17.8543	26.4199	weka.classifiers.meta.RandomSubSpace (RandomTree)
		9401	7521	1880	78	0.3515	17.576	26.4054	weka.classifiers.functions.GaussianProcesses (Puk)
	Descriptors/FPs Type	Unique records	Training Set Molecules	Validation Set Molecules	Number of descriptors / FPs used	R	MAE	RMSE	Technique Used
	AtomPairs2DFingerprintCount	9753	7802	1951	99	0.4585	16.6578	25.1939	weka.classifiers.meta.RandomSubSpace (RandomForest)
		9753	7802	1951	99	0.4578	16.0106	25.4349	weka.classifiers.meta.RandomCommittee (RandomForest)
		9753	7802	1951	99	0.4553	16.0334	25.4977	weka.classifiers.trees.RandomForest
		9753	7802	1951	99	0.452	16.2701	25.3937	weka.classifiers.meta.Bagging (RandomForest)
		9753	7802	1951	99	0.4481	16.1091	25.5866	weka.classifiers.meta.RegressionByDiscretization (RandomForest)
