# Supplementary material for: ASCoVPred: a machine learning-based platform for quantitative prediction of anti-SARS-CoV-2 activity and human cell toxicity of molecules
Source: Research Square preprint supplement (doi:10.21203/rs.3.rs-967196/v1), 2021-10-13
Supplement: Supplementary file 21 [file 0903f3fcd4839728c854c655.xlsx]

## Sheet: Table1
Table 1. Top 10 positively correlated fingerprints with maximum response.
Fingerprint	Pearson Correlation Coefficient (R) value
SubFPC109	0.0454874
SubFPC246	0.0512528
SubFPC151	0.0528078
SubFPC224	0.0547143
SubFPC84	0.0577213
SubFPC41	0.0728955
SubFPC35	0.0794288
SubFPC13	0.0796319
SubFPC27	0.0806172
SubFPC128	0.0833688

## Sheet: Table2
	Table 2. Highly active 100 compounds containing top 10 positively correlated fingerprints and their maximum response values.
	SubFPC109	SubFPC246	SubFPC151	SubFPC224	SubFPC84	SubFPC41	SubFPC35	SubFPC13	SubFPC27	SubFPC128	Maximum response
	0	0	0	0	0	0	0	0	0	0	-102.125
	0	0	0	0	0	0	0	0	0	0	-101.889
	0	0	0	0	0	0	0	0	0	0	-101.889
	0	0	0	0	0	0	0	0	0	0	-101.889
	0	0	0	0	0	0	0	0	0	0	-101.653
	0	0	0	0	1	0	0	0	0	0	-101.181
	0	0	0	0	0	0	0	0	0	0	-100.945
	0	0	0	0	0	0	0	0	0	0	-100.708
	0	0	0	0	0	0	0	0	0	0	-100.472
	0	0	0	0	0	0	0	0	0	0	-100.472
	0	0	0	0	0	0	0	0	0	0	-100.236
	0	0	0	0	0	0	0	0	0	0	-100
	0	0	0	0	0	0	0	0	0	0	-100
	0	0	0	0	1	0	0	0	0	0	-100
	0	0	0	0	1	0	0	0	0	0	-99.7639
	0	0	0	0	0	0	0	0	0	0	-99.5528
	0	0	0	0	0	0	0	0	0	0	-99.5277
	0	0	0	0	0	0	0	0	0	0	-99.5277
	0	0	0	0	0	0	0	0	0	0	-99.5277
	0	0	0	1	0	0	0	0	0	0	-99.5277
	0	0	0	0	0	0	0	0	0	0	-99.1056
	0	0	0	0	0	0	0	0	0	0	-99.1056
	0	0	0	0	0	0	0	0	0	0	-98.9939
	0	0	0	0	0	0	0	0	0	0	-98.9939
	0	0	0	0	0	0	0	0	0	0	-98.8821
	0	0	0	0	0	0	0	0	0	0	-98.8821
	0	0	0	0	1	0	0	0	0	0	-98.8194
	0	0	0	0	0	0	0	0	0	0	-98.6585
	0	0	0	0	0	0	0	0	0	0	-98.5832
	0	0	0	0	0	0	0	0	0	0	-98.5467
	0	0	0	0	0	0	0	0	0	0	-98.4349
	0	0	0	0	0	0	0	0	0	0	-98.4349
	0	0	0	0	0	0	1	0	1	0	-98.3471
	0	0	0	0	0	0	0	0	0	0	-98.3231
	0	0	0	0	0	0	0	0	0	0	-98.111
	0	0	0	0	0	0	0	0	0	0	-98.111
	0	0	0	0	0	0	0	2	0	0	-98.111
	0	0	0	0	0	0	0	0	0	0	-97.9877
	0	0	0	0	0	0	0	0	0	0	-97.8749
	0	0	0	0	0	0	0	0	0	0	-97.8749
	0	0	0	0	0	0	0	0	0	0	-97.6387
	0	0	0	0	0	0	0	0	0	0	-97.5405
	0	0	0	0	0	0	0	0	0	0	-97.3169
	0	0	0	0	0	0	0	0	0	0	-96.9303
	0	0	0	0	0	1	0	0	0	0	-96.8698
	0	0	0	0	0	0	0	0	0	0	-96.6942
	0	0	0	0	0	0	0	0	0	0	-96.6942
	0	0	0	0	0	0	0	0	0	0	-96.6942
	0	0	0	0	0	0	0	0	0	0	-96.4581
	0	0	0	0	0	0	0	0	0	0	-96.4319
	0	0	0	0	0	0	0	0	0	0	-96.4226
	0	0	0	0	0	0	0	0	0	0	-96.199
	0	0	0	0	0	0	0	0	0	0	-96.199
	0	0	0	0	0	0	0	0	0	0	-95.9858
	0	0	0	0	0	0	0	0	0	0	-95.9858
	0	0	0	0	0	0	0	0	0	0	-95.9754
	0	0	0	0	0	0	0	0	0	0	-95.9754
	0	0	0	0	0	0	0	0	0	0	-95.7518
	0	0	0	0	0	0	0	0	0	0	-95.7518
	0	0	0	0	0	0	0	0	0	0	-95.7518
	0	0	0	0	0	0	0	0	0	0	-95.7497
	0	0	0	0	0	0	0	0	0	0	-95.4164
	0	0	0	0	1	0	0	0	0	0	-95.0811
	0	0	0	0	0	0	0	0	0	0	-95.0413
	0	0	0	0	0	0	0	0	0	0	-95.0413
	0	0	0	0	0	0	0	0	0	0	-95.0413
	0	0	0	0	0	0	0	0	0	0	-94.5691
	0	0	0	0	0	0	0	0	0	0	-94.5221
	0	0	0	0	0	0	0	0	0	0	-94.3329
	0	0	0	0	0	0	0	0	0	0	-94.0968
	0	0	0	0	0	0	0	0	0	0	-94.0749
	0	0	0	0	0	0	0	0	0	0	-93.9631
	0	0	0	0	0	0	0	0	0	0	-93.9631
	0	0	0	0	0	0	0	0	0	0	-93.9631
	0	0	0	0	1	0	0	0	0	0	-93.8513
	0	0	0	0	0	0	0	0	0	0	-93.6277
	0	0	0	0	0	0	0	0	0	0	-93.6246
	0	0	0	0	0	0	0	1	0	0	-93.6246
	0	0	0	0	0	0	0	0	0	0	-93.5159
	0	0	0	0	0	0	0	0	0	0	-93.5159
	0	0	0	0	0	0	0	0	0	0	-93.4041
	0	0	0	0	1	0	0	0	0	0	-93.4041
	0	0	0	0	0	0	0	0	0	0	-93.3884
	0	0	0	0	0	0	0	0	0	0	-92.9162
	0	0	0	0	0	0	0	0	0	0	-92.8452
	0	0	0	0	0	0	0	0	0	0	-92.7334
	0	0	0	0	0	0	0	0	0	0	-92.68
	0	0	0	0	0	0	0	0	0	0	-92.68
	0	0	0	0	0	0	1	0	1	0	-92.5098
	0	0	0	0	0	0	0	0	0	0	-92.4439
	0	0	0	0	0	0	0	0	0	0	-92.2862
	0	0	0	0	1	0	0	0	0	0	-91.9717
	0	0	0	0	0	0	0	0	0	0	-91.6154
	0	0	0	0	0	0	0	0	0	0	-91.6154
	0	0	0	0	0	0	0	0	0	0	-91.5036
	0	0	0	0	1	0	0	0	0	0	-91.4994
	0	0	0	0	0	0	0	0	0	0	-91.1683
	0	0	0	0	0	1	0	0	0	0	-90.8329
	0	0	0	0	0	0	0	0	0	0	-90.7689
	0	0	0	0	0	0	0	0	0	0	-90.7211
Average values:->	0	0	0	0.01	0.09	0.02	0.02	0.03	0.02	0	-96.3994

## Sheet: Table3
	Table 3. Least active 100 compounds containing top 10 positively correlated fingerprints and their maximum response values.
	SubFPC109	SubFPC246	SubFPC151	SubFPC224	SubFPC84	SubFPC41	SubFPC35	SubFPC13	SubFPC27	SubFPC128	Maximum response
	0	0	0	0	0	0	0	0	0	0	3.29793
	0	0	0	0	0	0	0	0	0	0	3.29793
	0	1	0	0	0	0	0	0	0	0	3.29793
	0	0	1	0	0	0	0	0	0	0	3.40973
	0	0	0	0	0	0	0	0	0	0	3.42385
	0	0	0	0	0	0	0	0	0	0	3.42385
	0	0	0	0	0	0	0	0	0	0	3.42385
	0	0	0	0	0	0	0	0	0	0	3.42385
	0	0	0	0	0	1	0	1	0	0	3.42385
	0	0	0	0	1	0	0	1	0	0	3.42385
	0	0	0	0	0	0	0	0	0	0	3.46562
	0	0	0	0	0	0	0	0	0	0	3.52152
	0	0	0	0	0	0	1	0	1	0	3.52152
	0	0	0	1	0	0	0	0	0	0	3.52152
	0	0	0	0	1	0	0	0	0	0	3.61418
	0	0	0	0	0	0	0	0	0	0	3.63332
	0	0	0	0	2	0	0	0	0	1	3.63332
	0	0	0	0	0	0	0	0	0	0	3.65998
	0	0	0	0	0	0	0	0	0	0	3.65998
	0	0	0	0	0	0	0	0	0	0	3.65998
	0	0	0	0	0	0	0	0	0	0	3.65998
	0	0	0	0	0	2	0	1	0	0	3.65998
	0	0	0	0	1	0	0	0	0	0	3.65998
	0	0	0	0	1	0	0	0	0	0	3.65998
	0	0	0	0	1	0	0	1	0	0	3.65998
	0	0	0	0	0	0	0	0	0	0	3.74511
	0	0	0	0	0	0	0	0	0	0	3.74511
	0	0	0	0	0	0	1	0	1	0	3.74511
	0	0	0	0	0	0	0	0	0	0	3.77804
	0	0	0	0	0	0	0	0	0	0	3.77804
	0	0	0	0	1	0	0	0	0	1	3.80101
	0	0	0	0	0	0	0	0	0	0	3.8569
	0	0	0	0	0	0	0	0	0	0	3.8569
	0	0	0	0	4	0	0	1	0	0	3.8569
	0	0	0	0	0	0	0	0	0	0	3.8961
	0	0	0	0	0	0	0	0	0	0	3.8961
	0	0	0	0	0	0	0	0	0	0	3.8961
	0	0	0	0	0	0	0	0	0	0	3.8961
	0	0	0	0	0	0	0	0	0	0	3.8961
	0	0	0	0	0	0	1	0	1	0	3.8961
	0	0	0	0	1	0	0	0	0	0	3.8961
	0	0	0	0	0	0	0	0	0	0	3.9687
	0	0	0	0	0	0	0	0	0	0	3.9687
	0	0	0	0	0	0	0	0	0	0	4.01417
	0	0	0	0	0	0	0	0	0	0	4.01417
	0	0	0	0	0	0	0	0	0	0	4.01417
	0	0	0	0	0	0	1	0	0	0	4.01417
	0	0	0	0	0	0	0	0	0	0	4.08049
	0	0	0	0	0	0	0	0	0	0	4.13223
	0	0	0	0	0	0	0	0	0	0	4.13223
	0	0	0	0	0	0	0	0	0	0	4.13223
	0	0	0	0	0	0	0	0	0	0	4.13223
	0	0	0	0	0	0	0	1	0	0	4.13223
	0	0	0	0	1	0	0	0	0	0	4.13223
	0	0	0	0	1	0	0	0	0	0	4.13223
	0	0	0	0	1	0	0	0	0	0	4.13223
	0	0	0	0	1	0	0	0	0	0	4.13223
	0	0	1	0	0	0	0	0	0	0	4.13223
	0	0	0	0	2	0	0	0	0	0	4.13639
	0	0	0	0	1	0	0	0	0	0	4.19229
	0	0	0	0	0	0	0	0	0	0	4.24818
	0	0	0	0	1	0	0	0	0	0	4.24818
	0	0	0	0	0	0	0	0	0	0	4.25029
	0	0	0	0	0	0	0	0	0	0	4.25029
	0	0	0	0	0	0	0	0	0	0	4.30408
	0	0	0	0	0	0	0	0	0	0	4.30408
	0	1	0	0	0	0	0	0	0	0	4.30408
	0	0	0	0	0	0	0	0	0	0	4.36836
	0	0	0	0	0	0	0	0	0	0	4.36836
	0	0	0	0	0	0	0	0	0	0	4.36836
	0	0	0	0	0	0	0	0	0	0	4.36836
	0	0	0	0	0	0	0	0	0	0	4.36836
	0	0	0	0	0	0	0	0	0	0	4.36836
	0	0	0	0	0	0	0	1	0	0	4.36836
	0	0	0	0	1	0	0	0	0	0	4.36836
	0	0	1	0	0	0	0	0	0	0	4.36836
	0	0	0	1	0	0	0	0	0	0	4.41587
	0	0	1	0	0	0	0	0	0	0	4.48642
	0	0	0	0	0	0	0	0	0	0	4.52767
	0	0	0	0	0	0	0	0	0	0	4.52767
	0	0	0	0	0	0	0	0	0	0	4.52767
	0	0	0	0	0	0	0	0	0	0	4.52767
	0	0	0	0	0	0	0	0	0	0	4.52767
	0	0	0	0	0	0	0	0	0	0	4.60449
	0	0	0	0	0	0	0	0	0	0	4.60449
	0	0	0	0	0	0	0	0	0	0	4.60449
	1	0	0	0	0	0	0	0	0	0	4.63946
	0	0	0	0	0	0	0	0	0	0	4.72255
	0	0	0	0	0	0	0	0	0	0	4.75126
	0	0	0	0	0	0	0	0	0	0	4.75126
	0	0	0	0	1	0	0	0	0	0	4.75126
	0	0	0	0	1	0	0	0	0	1	4.80715
	0	0	0	0	0	0	0	0	0	0	4.84061
	0	0	0	0	0	0	0	0	0	0	4.84061
	0	0	0	0	0	0	0	0	0	0	4.84061
	0	0	0	0	0	0	0	0	0	0	4.86305
	0	0	0	0	0	0	0	0	0	0	4.86305
	0	0	0	0	0	0	1	1	1	0	4.86305
	0	0	1	0	0	0	0	0	0	0	4.86305
	0	0	0	0	0	0	0	0	0	0	4.97485
Average values:->	0.01	0.02	0.05	0.02	0.24	0.03	0.05	0.08	0.04	0.03	4.09149

## Sheet: Table4
Table 4. Top 10 positively correlated fingerprints and their average values for highly active and least active compounds.
Fingerprint	Highly active compounds (n=100)	Least active compounds (n=100)
SubFPC109	0	0.01
SubFPC246	0	0.02
SubFPC151	0	0.05
SubFPC224	0.01	0.02
SubFPC84	0.09	0.24
SubFPC41	0.02	0.03
SubFPC35	0.02	0.05
SubFPC13	0.03	0.08
SubFPC27	0.02	0.04
SubFPC128	0	0.03
Maximum response	-96.3994	4.09149
