# Supplementary material for: ASCoVPred: a machine learning-based platform for quantitative prediction of anti-SARS-CoV-2 activity and human cell toxicity of molecules
Source: Research Square preprint supplement (doi:10.21203/rs.3.rs-967196/v1), 2021-10-13
Supplement: Supplementary file 22 [file 183da0136442d77d72306f61.xlsx]

## Sheet: Assay-8-ML-results
Table 1. Summary of whole descriptors/fingerprints-based datasets.
Sr.No.	Descriptors / FPs Type	Total number of descriptors / FPs	Unique records	Training set molecules	Validation set molecules	Maximum descriptors allowed	Model building status
1	1D & 2D	1444	4804	3843	961	768.6	No
2	Fingerprinter	1024	5149	4119	1030	823.8	No
3	ExtendedFingerprinter	1024	5149	4119	1030	823.8	No
4	EStateFingerprinter	79	5139	4111	1028	822.2	Yes
5	GraphOnlyFingerprinter	1024	5149	4119	1030	823.8	No
6	MACCSFingerprinter	166	5144	4115	1029	823	Yes
7	PubchemFingerprinter	881	5144	4115	1029	823	No
8	SubstructureFingerprinter	307	5144	4115	1029	823	Yes
9	SubstructureFingerprintCount	307	5144	4115	1029	823	Yes
10	KlekotaRothFingerprinter	4860	5144	4115	1029	823	No
11	KlekotaRothFingerprintCount	4860	5144	4115	1029	823	No
12	AtomPairs2DFingerprinter	780	5147	4118	1029	823.6	Yes
13	AtomPairs2DFingerprintCount	780	5149	4119	1030	823.8	Yes
Table 2. Summary of selected descriptors/fingerprints-based datasets.							Yes
Sr.No.	Descriptors / FPs Type	Number of descriptors / FPs after feature selection	Unique records	Training set molecules	Validation set molecules	Maximum descriptors allowed	Model building status
1	1D & 2D	67	4804	3843	961	768.6	Yes
2	Fingerprinter	22	5060	4048	1012	809.6	Yes
3	ExtendedFingerprinter	18	5066	4053	1013	810.6	Yes
4	EStateFingerprinter	16	4217	3374	843	674.8	Yes
5	GraphOnlyFingerprinter	30	4744	3795	949	759	Yes
6	MACCSFingerprinter	20	5072	4058	1014	811.6	Yes
7	PubchemFingerprinter	28	3334	2667	667	533.4	Yes
8	SubstructureFingerprinter	21	3473	2778	695	555.6	Yes
9	SubstructureFingerprintCount	11	4646	3717	929	743.4	Yes
10	KlekotaRothFingerprinter	236	2821	2257	564	451.4	Yes
11	KlekotaRothFingerprintCount	273	2932	2346	586	469.2	Yes
12	AtomPairs2DFingerprinter	8	3310	2648	662	529.6	Yes
13	AtomPairs2DFingerprintCount	46	3854	3083	771	616.6	Yes
Table 3. Best five models performance with whole and selected descriptors/fingerprints-based datasets.
	Descriptors/FPs Type	Unique records	Training Set Molecules	Validation Set Molecules	Number of descriptors / FPs used	R	MAE	RMSE	Technique Used
	EStateFingerprinter	5139	4111	1028	79	0.2	11.53	41.54	weka.classifiers.functions.SMOreg (Puk)
		5139	4111	1028	79	0.17	12	41.41	weka.classifiers.meta.RandomSubSpace (RandomTree)
		5139	4111	1028	79	0.16	12.04	41.73	weka.classifiers.meta.Bagging (M5P)
		5139	4111	1028	79	0.16	11.78	41.3	weka.classifiers.meta.RandomCommittee (REPTree)
		5139	4111	1028	79	0.15	12.2	41.66	weka.classifiers.meta.Bagging (REPTree)
	Descriptors/FPs Type	Unique records	Training Set Molecules	Validation Set Molecules	Number of descriptors / FPs used	R	MAE	RMSE	Technique Used
	MACCSFingerprinter	5144	4115	1029	166	0.42	12.02	37.95	weka.classifiers.meta.AdditiveRegression (RandomForest)
		5144	4115	1029	166	0.42	11.48	38.24	weka.classifiers.meta.RandomCommittee (RandomForest)
		5144	4115	1029	166	0.42	11.77	38.16	weka.classifiers.trees.RandomForest
		5144	4115	1029	166	0.41	11.51	38.37	weka.classifiers.meta.RandomSubSpace (RandomForest)
		5144	4115	1029	166	0.39	11.5	38.9	weka.classifiers.meta.Bagging (RandomForest)
	Descriptors/FPs Type	Unique records	Training Set Molecules	Validation Set Molecules	Number of descriptors / FPs used	R	MAE	RMSE	Technique Used
	SubstructureFingerprinter	5144	4115	1029	307	0.4	12.08	38.72	weka.classifiers.meta.Bagging (M5P)
		5144	4115	1029	307	0.37	12.89	41.69	weka.classifiers.lazy.IBk
		5144	4115	1029	307	0.37	12.4	40.69	weka.classifiers.lazy.KStar (Normalize over the attributes)
		5144	4115	1029	307	0.37	12.4	40.69	weka.classifiers.lazy.KStar (Average column entropy curves)
		5144	4115	1029	307	0.35	11.54	39.31	weka.classifiers.meta.RandomSubSpace (RandomForest)
	Descriptors/FPs Type	Unique records	Training Set Molecules	Validation Set Molecules	Number of descriptors / FPs used	R	MAE	RMSE	Technique Used
	SubstructureFingerprintCount	5144	4115	1029	307	0.52	11.12	36.47	weka.classifiers.trees.RandomForest
	Deployed on Webserver	Validation dataset performance		1029	307	0.73	14.99	44.64
		5144	4115	1029	307	0.51	11.35	35.91	weka.classifiers.meta.AdditiveRegression (RandomForest)
		5144	4115	1029	307	0.5	10.95	36.78	weka.classifiers.meta.RandomCommittee (RandomForest)
		5144	4115	1029	307	0.5	11.01	36.84	weka.classifiers.meta.RandomSubSpace (RandomForest)
		5144	4115	1029	307	0.48	12.54	36.75	weka.classifiers.functions.SMOreg (Puk)
	Descriptors/FPs Type	Unique records	Training Set Molecules	Validation Set Molecules	Number of descriptors / FPs used	R	MAE	RMSE	Technique Used
	AtomPairs2DFingerprinter	5147	4118	1029	780	0.35	10.9	39.18	weka.classifiers.functions.SMOreg (Puk)
		5147	4118	1029	780	0.35	10.71	39.57	weka.classifiers.functions.GaussianProcesses (Puk)
		5147	4118	1029	780	0.33	11.69	39.94	weka.classifiers.meta.AdditiveRegression (RandomForest)
		5147	4118	1029	780	0.32	11.22	39.63	weka.classifiers.meta.RandomCommittee (RandomForest)
		5147	4118	1029	780	0.31	11.53	39.74	weka.classifiers.trees.RandomForest
	Descriptors/FPs Type	Unique records	Training Set Molecules	Validation Set Molecules	Number of descriptors / FPs used	R	MAE	RMSE	Technique Used
	AtomPairs2DFingerprintCount	5149	4119	1030	780	0.23	11.37	40.71	weka.classifiers.meta.RandomCommittee (RandomForest)
		5149	4119	1030	780	0.22	11.31	40.75	weka.classifiers.meta.Bagging (RandomForest)
		5149	4119	1030	780	0.22	11.54	40.76	weka.classifiers.trees.RandomForest
		5149	4119	1030	780	0.22	11.95	41	weka.classifiers.meta.AdditiveRegression (RandomForest)
		5149	4119	1030	780	0.22	11.37	40.8	weka.classifiers.meta.RandomSubSpace (RandomForest)
	Descriptors/FPs Type	Unique records	Training Set Molecules	Validation Set Molecules	Number of descriptors / FPs used	R	MAE	RMSE	Technique Used
	1D & 2D	4804	3843	961	67	0.47	12.9	37.99	weka.classifiers.functions.SMOreg (Puk)
		4804	3843	961	67	0.44	13.12	40.47	weka.classifiers.lazy.IBk
		4804	3843	961	67	0.43	11.59	39.18	weka.classifiers.meta.RegressionByDiscretization (RandomForest)
		4804	3843	961	67	0.43	12.07	38.78	weka.classifiers.meta.AdditiveRegression (RandomForest)
		4804	3843	961	67	0.42	11.67	39.2	weka.classifiers.meta.RandomSubSpace (RandomForest)
	Descriptors/FPs Type	Unique records	Training Set Molecules	Validation Set Molecules	Number of descriptors / FPs used	R	MAE	RMSE	Technique Used
	Fingerprinter	5060	4048	1012	22	0.51	11.25	36.27	weka.classifiers.functions.SMOreg (Puk)
		5060	4048	1012	22	0.49	11.19	37.48	weka.classifiers.functions.GaussianProcesses (Puk)
		5060	4048	1012	22	0.44	12.46	40.02	weka.classifiers.meta.AdditiveRegression (RandomForest)
		5060	4048	1012	22	0.41	12.5	41.44	weka.classifiers.meta.RandomCommittee (RandomTree)
		5060	4048	1012	22	0.4	12.12	39.2	weka.classifiers.trees.RandomForest
	Descriptors/FPs Type	Unique records	Training Set Molecules	Validation Set Molecules	Number of descriptors / FPs used	R	MAE	RMSE	Technique Used
	ExtendedFingerprinter	5066	4053	1013	18	0.37	11.53	40.46	weka.classifiers.meta.RandomizableFilteredClassifier (KStar)
		5066	4053	1013	18	0.37	11.53	40.46	weka.classifiers.meta.RandomizableFilteredClassifier (KStar)
		5066	4053	1013	18	0.37	13.35	45.76	weka.classifiers.meta.AdditiveRegression (RandomTree)
		5066	4053	1013	18	0.37	13.35	45.76	weka.classifiers.meta.AdditiveRegression (RandomTree)
		5066	4053	1013	18	0.36	12.41	39.76	weka.classifiers.meta.RandomCommittee (RandomForest)
	Descriptors/FPs Type	Unique records	Training Set Molecules	Validation Set Molecules	Number of descriptors / FPs used	R	MAE	RMSE	Technique Used
	EStateFingerprinter	4217	3374	843	16	0.12	10.19	31.72	weka.classifiers.rules.DecisionTable (GreedyStepwise)
		4217	3374	843	16	0.12	10.19	31.72	weka.classifiers.rules.DecisionTable (BestFirst)
		4217	3374	843	16	0.12	10.19	31.72	weka.classifiers.rules.DecisionTable
		4217	3374	843	16	0.12	10.19	31.72	weka.classifiers.misc.InputMappedClassifier (DecisionTable)
		4217	3374	843	16	0.12	10.19	31.72	weka.classifiers.meta.CVParameterSelection (DecisionTable)
	Descriptors/FPs Type	Unique records	Training Set Molecules	Validation Set Molecules	Number of descriptors / FPs used	R	MAE	RMSE	Technique Used
	GraphOnlyFingerprinter	4744	3795	949	30	0.5	10.35	30.54	weka.classifiers.lazy.KStar (Normalize over the attributes)
		4744	3795	949	30	0.5	10.35	30.54	weka.classifiers.lazy.KStar (Average column entropy curves)
		4744	3795	949	30	0.46	11.4	32.41	weka.classifiers.lazy.IBk
		4744	3795	949	30	0.44	10.65	31.96	weka.classifiers.meta.RandomSubSpace (RandomTree)
		4744	3795	949	30	0.42	11.62	32.93	weka.classifiers.meta.RandomCommittee (RandomTree)
	Descriptors/FPs Type	Unique records	Training Set Molecules	Validation Set Molecules	Number of descriptors / FPs used	R	MAE	RMSE	Technique Used
	MACCSFingerprinter	5072	4058	1014	20	0.23	11.49	41	weka.classifiers.meta.RandomCommittee (REPTree)
		5072	4058	1014	20	0.22	12.33	41.35	weka.classifiers.meta.AdditiveRegression (REPTree)
		5072	4058	1014	20	0.19	12.03	41.64	weka.classifiers.trees.REPTree
		5072	4058	1014	20	0.19	11.45	41.48	weka.classifiers.meta.RandomSubSpace (REPTree)
		5072	4058	1014	20	0.18	11.95	41.62	weka.classifiers.lazy.KStar (Normalize over the attributes)
	Descriptors/FPs Type	Unique records	Training Set Molecules	Validation Set Molecules	Number of descriptors / FPs used	R	MAE	RMSE	Technique Used
	PubchemFingerprinter	3334	2667	667	28	0.19	9.07	29.28	weka.classifiers.meta.RandomizableFilteredClassifier (KStar)
		3334	2667	667	28	0.18	9.23	29.59	weka.classifiers.meta.Bagging (RandomForest)
		3334	2667	667	28	0.17	9.28	29.81	weka.classifiers.meta.Bagging (RandomTree)
		3334	2667	667	28	0.16	9.13	29.5	weka.classifiers.functions.GaussianProcesses (Puk)
		3334	2667	667	28	0.16	9.28	29.94	weka.classifiers.lazy.IBk
	Descriptors/FPs Type	Unique records	Training Set Molecules	Validation Set Molecules	Number of descriptors / FPs used	R	MAE	RMSE	Technique Used
	SubstructureFingerprinter	3473	2778	695	21	0.12	8.89	28.93	weka.classifiers.functions.GaussianProcesses (RBFKernel)
		3473	2778	695	21	0.11	9.24	29.07	weka.classifiers.functions.GaussianProcesses (PolyKernel)
		3473	2778	695	21	0.1	9.47	29.23	weka.classifiers.functions.LinearRegression (No attribute selection)
		3473	2778	695	21	0.09	9.52	29.26	weka.classifiers.meta.AdditiveRegression (DecisionStump)
		3473	2778	695	21	0.09	9.52	29.26	weka.classifiers.meta.AdditiveRegression (DecisionStump)
	Descriptors/FPs Type	Unique records	Training Set Molecules	Validation Set Molecules	Number of descriptors / FPs used	R	MAE	RMSE	Technique Used
	SubstructureFingerprintCount	4646	3717	929	11	0.44	11.74	37.81	weka.classifiers.functions.GaussianProcesses (Puk)
		4646	3717	929	11	0.27	13.38	40.41	weka.classifiers.functions.GaussianProcesses (NormalizedPolyKernel)
		4646	3717	929	11	0.16	13.19	41.44	weka.classifiers.functions.LinearRegression (Greedy method)
		4646	3717	929	11	0.16	13.19	41.44	weka.classifiers.functions.GaussianProcesses (PolyKernel)
		4646	3717	929	11	0.15	11.57	41.34	weka.classifiers.functions.GaussianProcesses (RBFKernel)
	Descriptors/FPs Type	Unique records	Training Set Molecules	Validation Set Molecules	Number of descriptors / FPs used	R	MAE	RMSE	Technique Used
	KlekotaRothFingerprinter	2821	2257	564	236	0.12	9.5	31.88	weka.classifiers.functions.LinearRegression (No attribute selection)
		2821	2257	564	236	0.11	9.47	31.63	weka.classifiers.functions.GaussianProcesses (PolyKernel)
		2821	2257	564	236	0.11	8.8	31.23	weka.classifiers.meta.RandomSubSpace (RandomForest)
		2821	2257	564	236	0.11	9.24	31.93	weka.classifiers.meta.AdditiveRegression (DecisionStump)
		2821	2257	564	236	0.1	8.8	31.26	weka.classifiers.meta.RandomSubSpace (RandomTree)
	Descriptors/FPs Type	Unique records	Training Set Molecules	Validation Set Molecules	Number of descriptors / FPs used	R	MAE	RMSE	Technique Used
	KlekotaRothFingerprintCount	2932	2346	586	273	0.21	8.57	30.6	weka.classifiers.meta.RegressionByDiscretization (J48)
		2932	2346	586	273	0.13	8.49	30.66	weka.classifiers.lazy.KStar (Normalize over the attributes)
		2932	2346	586	273	0.13	8.49	30.66	weka.classifiers.lazy.KStar (Average column entropy curves)
		2932	2346	586	273	0.12	9.32	31.37	weka.classifiers.meta.Bagging (RandomForest)
		2932	2346	586	273	0.12	8.64	30.62	weka.classifiers.rules.DecisionTable (BestFirst)
	Descriptors/FPs Type	Unique records	Training Set Molecules	Validation Set Molecules	Number of descriptors / FPs used	R	MAE	RMSE	Technique Used
	AtomPairs2DFingerprinter	3310	2648	662	8	0.07	8.09	29.72	weka.classifiers.functions.SMOreg (RBFKernel)
		3310	2648	662	8	0.03	8.62	29.67	weka.classifiers.meta.Bagging (RandomForest)
		3310	2648	662	8	0.03	8.54	29.62	weka.classifiers.functions.GaussianProcesses (RBFKernel)
		3310	2648	662	8	0.03	8.63	29.69	weka.classifiers.functions.GaussianProcesses (NormalizedPolyKernel)
		3310	2648	662	8	0.03	8.58	29.65	weka.classifiers.rules.DecisionTable (GreedyStepwise)
	Descriptors/FPs Type	Unique records	Training Set Molecules	Validation Set Molecules	Number of descriptors / FPs used	R	MAE	RMSE	Technique Used
	AtomPairs2DFingerprintCount	3854	3083	771	46	0.22	9.35	31.91	weka.classifiers.lazy.KStar (Normalize over the attributes)
		3854	3083	771	46	0.22	9.35	31.91	weka.classifiers.lazy.KStar (Average column entropy curves)
		3854	3083	771	46	0.21	10.08	33.01	weka.classifiers.trees.RandomTree
		3854	3083	771	46	0.2	9.53	32.06	weka.classifiers.meta.RandomSubSpace (RandomForest)
		3854	3083	771	46	0.2	9.57	32.1	weka.classifiers.meta.RandomSubSpace (RandomTree)
