# Supplementary material for: ASCoVPred: a machine learning-based platform for quantitative prediction of anti-SARS-CoV-2 activity and human cell toxicity of molecules
Source: Research Square preprint supplement (doi:10.21203/rs.3.rs-967196/v1), 2021-10-13
Supplement: Supplementary file 23 [file 23678ab5fad474c0cfc6e5a7.xlsx]

## Sheet: Table1
Table 1. Top 10 positively correlated fingerprints with maximum response.
Fingerprint	Pearson Correlation Coefficient (R) value
SubFPC28	0.155504
SubFPC181	0.116359
SubFPC184	0.0954116
SubFPC275	0.0734122
SubFPC190	0.0438046
SubFPC19	0.0368346
SubFPC179	0.0329206
SubFPC30	0.0322314
SubFPC86	0.0285972
SubFPC135	0.0271055

## Sheet: Table2
	Table 2. Highly active 100 compounds containing top 10 positively correlated fingerprints and their maximum response values.
	SubFPC28	SubFPC181	SubFPC184	SubFPC275	SubFPC190	SubFPC19	SubFPC179	SubFPC30	SubFPC86	SubFPC135	Maximum response
	0	0	0	0	0	0	0	0	0	0	-96.6794
	0	0	0	0	0	0	0	0	0	0	-95.3053
	0	0	0	0	0	0	0	0	0	0	-90.9244
	0	0	0	0	0	0	0	0	0	0	-90.3226
	0	0	0	0	0	0	0	0	0	0	-89.9618
	0	0	0	0	0	0	0	0	0	0	-83.626
	0	0	0	0	0	0	0	0	0	0	-82.5214
	0	0	0	0	0	0	0	0	0	0	-77.315
	0	0	0	0	0	0	0	0	0	0	-74.5462
	0	0	0	0	0	0	0	0	0	0	-64.313
	0	0	1	1	0	0	0	0	0	0	-56.9847
	0	2	2	2	0	0	0	0	0	1	-48.1592
	0	0	0	2	0	0	0	0	0	6	-43.855
	0	0	0	0	0	0	0	0	0	0	-43.4018
	0	0	0	1	0	0	0	0	0	0	-39.7546
	2	2	2	2	0	0	0	0	0	2	-36.9847
	0	0	0	1	0	0	0	0	0	3	-35.5344
	0	1	1	3	0	0	0	0	0	0	-34.9393
	0	0	0	2	0	0	0	0	0	4	-32.54
	0	4	5	5	0	0	0	0	0	0	-32.2499
	0	1	2	2	0	0	0	0	0	0	-31.1688
	0	0	0	3	0	0	0	0	0	0	-29.4275
	0	0	0	2	0	0	0	0	1	0	-29.4093
	0	0	1	2	0	0	1	0	0	0	-29.2951
	0	0	0	3	0	0	0	0	1	0	-28.9699
	0	0	1	4	0	0	1	0	0	1	-28.3664
	0	2	3	3	0	0	0	0	0	0	-27.2901
	0	0	0	0	0	0	0	0	0	0	-27.0633
	0	0	0	0	0	0	0	0	0	0	-26.8468
	0	0	0	6	0	0	0	0	1	0	-26.1435
	0	1	1	3	0	0	0	0	0	2	-26.1416
	0	0	0	3	0	0	0	0	0	0	-25.3037
	0	0	0	4	0	0	0	0	3	0	-25.2427
	0	1	1	3	0	0	0	0	0	4	-25.1766
	0	0	0	1	0	0	0	0	0	1	-24.9894
	0	0	0	0	0	0	0	0	0	0	-24.7304
	0	0	0	4	0	0	0	0	0	0	-24.2983
	0	0	0	5	0	0	0	0	1	0	-23.9122
	1	4	5	9	0	0	0	0	0	0	-23.8793
	0	1	1	1	0	0	0	0	0	1	-23.855
	0	0	0	1	0	0	0	0	0	0	-23.7786
	0	0	0	4	0	2	0	0	0	0	-23.626
	0	1	2	3	0	0	0	0	0	0	-23.5542
	0	0	0	1	0	0	0	0	0	1	-23.466
	0	4	6	7	0	0	0	0	0	0	-23.1321
	0	0	0	2	0	0	0	0	0	0	-22.5573
	0	0	0	0	0	0	0	0	0	0	-22.4809
	0	0	0	0	0	0	0	0	0	4	-22.2879
	0	0	0	2	0	0	0	0	0	0	-22.2519
	0	0	0	3	0	0	0	0	0	1	-22.2016
	0	0	0	0	0	0	0	0	0	1	-22.1756
	0	1	2	2	0	0	0	0	0	0	-21.8702
	0	0	1	3	0	0	0	0	0	0	-21.3359
	0	1	1	3	0	0	0	0	0	0	-21.2819
	0	1	1	1	0	0	0	0	0	0	-21.1069
	0	1	1	1	0	0	0	0	0	1	-20.7683
	0	0	0	3	0	0	0	0	1	0	-20.1773
	0	0	0	0	0	0	0	0	0	0	-20.1145
	0	1	2	2	0	0	0	0	0	0	-20.0929
	0	0	0	0	0	0	0	0	0	0	-20.0382
	1	2	2	4	0	0	0	0	0	0	-20.0084
	0	0	1	1	0	0	0	0	0	0	-19.924
	0	0	0	0	0	0	0	0	0	0	-19.8215
	0	0	1	1	0	1	0	0	0	1	-19.7552
	0	2	3	3	0	0	1	0	0	0	-19.7552
	0	1	1	1	0	1	0	0	0	0	-19.5863
	0	2	3	4	0	0	1	0	0	0	-19.5224
	0	2	4	4	0	1	1	0	0	0	-19.4386
	1	2	2	3	0	0	0	0	0	0	-19.4175
	0	0	0	1	0	0	0	0	0	1	-19.3752
	0	1	1	3	0	0	0	0	1	0	-19.3009
	0	3	4	4	0	0	0	0	0	0	-19.2486
	0	0	0	0	0	0	0	0	0	0	-19.2265
	0	2	5	8	0	0	2	0	0	0	-19.2265
	0	0	0	4	0	0	0	0	0	0	-19.1521
	0	0	0	0	0	0	0	0	0	0	-18.929
	0	0	0	0	0	0	0	0	0	0	-18.8168
	0	1	3	3	0	0	0	0	0	0	-18.6845
	0	1	2	4	0	0	0	0	0	0	-18.6577
	0	0	0	0	0	0	0	0	0	0	-18.4083
	0	1	2	2	0	0	1	0	0	0	-18.4044
	0	0	0	0	0	0	0	0	0	0	-18.2061
	0	0	0	0	0	0	0	0	0	0	-18.1511
	0	0	0	0	0	0	0	0	0	0	-18.0667
	0	0	0	0	0	0	0	0	0	0	-18.0667
	0	0	0	0	0	0	0	0	0	1	-18.0364
	0	0	0	1	0	0	0	0	0	0	-18.0364
	0	0	0	0	0	0	0	0	0	0	-17.7629
	0	1	2	2	0	0	0	0	0	0	-17.5115
	0	0	1	2	0	0	1	0	0	1	-17.3913
	0	0	0	0	0	0	0	0	0	0	-17.2927
	0	0	0	0	0	0	0	0	0	0	-17.2225
	0	0	0	2	0	1	0	0	0	0	-17.138
	0	0	1	6	0	0	0	0	0	3	-17.0536
	0	2	2	5	0	0	0	0	0	1	-17.0536
	1	2	2	5	0	1	0	0	0	0	-17.0536
	0	0	1	2	0	0	1	0	0	0	-17.0088
	0	2	2	6	0	0	0	0	0	1	-16.925
	0	0	0	0	0	0	0	0	0	0	-16.8848
	0	0	0	1	0	0	0	0	0	2	-16.8848
Average values:->	0.06	0.56	0.87	1.97	0	0.07	0.1	0	0.09	0.44	-29.5613

## Sheet: Table3
	Table 3. Least active 100 compounds containing top 10 positively correlated fingerprints and their maximum response values.
	SubFPC28	SubFPC181	SubFPC184	SubFPC275	SubFPC190	SubFPC19	SubFPC179	SubFPC30	SubFPC86	SubFPC135	Maximum response
	0	2	4	4	0	0	1	0	0	2	40.6079
	0	1	1	4	0	0	0	0	0	0	41.1144
	0	0	0	0	0	0	0	0	0	0	41.2832
	0	2	2	4	0	0	0	0	0	0	42.1275
	0	0	0	3	0	0	0	0	0	3	42.2137
	0	0	1	4	0	0	1	0	0	1	42.2462
	1	3	5	7	0	0	0	0	0	0	42.6925
	0	1	2	3	0	1	1	0	0	0	43.0561
	2	4	4	4	0	0	0	0	0	0	43.8825
	0	1	2	2	0	0	0	0	0	0	44.7446
	0	3	5	9	0	0	1	0	0	0	44.829
	0	0	0	0	0	0	0	0	0	1	45.1469
	0	0	0	1	0	0	0	0	0	0	45.2451
	0	2	3	3	0	0	0	0	0	0	45.2512
	1	1	1	1	0	0	0	0	0	0	46.9466
	0	0	0	3	0	0	0	0	0	3	47.3398
	0	0	0	4	0	0	0	0	0	3	47.6013
	0	0	0	3	0	0	0	0	0	3	48.5496
	0	2	2	4	0	0	0	0	0	2	49.4656
	0	0	0	2	0	0	0	0	0	0	49.9237
	0	1	2	2	0	0	0	0	0	0	50.0633
	0	0	0	0	0	0	0	0	0	0	50.1527
	0	0	0	3	0	0	0	0	0	3	50.687
	1	3	4	5	0	0	0	0	0	0	53.778
	0	1	1	3	0	0	0	0	0	0	54.7328
	0	1	2	4	0	0	0	0	0	2	55.382
	0	2	3	3	0	1	0	0	0	0	55.5509
	0	3	5	5	0	0	1	0	0	0	55.6341
	0	1	2	5	0	0	1	0	0	1	58.2524
	1	1	2	2	0	0	1	0	0	0	58.5901
	0	0	0	4	0	0	0	0	0	2	58.8323
	1	4	6	8	0	0	0	0	0	0	59.5017
	0	2	2	6	0	0	0	0	0	0	61.0384
	0	2	2	6	0	0	0	0	0	0	61.5842
	0	0	2	4	0	0	2	0	0	0	62.0515
	0	0	1	2	0	0	1	0	0	0	62.2536
	2	4	4	4	0	0	0	0	0	0	62.3892
	0	0	0	4	0	0	0	0	0	3	65.0189
	0	0	0	3	0	0	0	0	0	3	66.9394
	0	2	3	4	0	0	0	0	0	0	68.3703
	0	1	2	2	0	0	0	0	0	0	69.5652
	0	3	5	7	0	0	1	0	0	0	71.507
	0	2	3	5	0	0	0	0	0	0	74.3192
	0	1	2	2	0	0	0	0	0	0	75.1908
	0	0	1	5	0	0	0	0	0	0	75.7436
	0	1	1	2	0	0	0	0	0	2	80.2026
	0	0	0	3	0	0	0	0	0	0	81.9755
	0	3	4	6	0	0	1	0	0	0	81.9755
	0	4	6	6	0	0	0	0	0	0	82.6142
	0	0	0	1	0	0	0	0	1	1	84.4275
	0	0	0	3	0	0	0	0	0	0	85.0874
	0	0	1	2	0	0	1	0	0	0	88.7294
	0	1	2	5	0	0	0	0	0	0	89.9036
	0	0	0	0	0	0	0	1	0	0	90.7556
	0	1	1	1	0	0	0	0	0	1	91.2442
	0	0	0	3	0	0	0	0	0	3	92.6718
	1	2	3	5	0	0	0	0	0	0	97.2519
	0	3	3	6	0	0	0	0	0	0	109.845
	0	3	5	6	0	0	1	0	0	0	113.951
	0	1	2	2	0	0	0	0	0	0	119.122
	0	2	2	5	0	0	0	0	0	0	119.797
	0	2	3	4	0	0	0	0	0	0	125.201
	0	4	6	8	0	0	1	0	0	1	125.454
	0	0	0	0	0	0	0	0	0	0	125.649
	0	0	0	0	0	0	0	0	0	0	126.77
	0	1	2	2	0	0	0	0	0	0	139.087
	0	2	2	5	0	0	0	0	0	0	145.622
	0	0	0	6	0	0	0	0	0	0	151.952
	1	2	2	5	0	0	0	0	0	0	154.58
	0	1	1	2	0	0	0	0	0	2	154.918
	0	3	5	6	0	0	0	0	0	0	155.002
	0	1	1	2	0	0	0	0	0	1	157.352
	0	1	2	3	0	0	0	0	0	1	157.382
	0	1	3	3	0	0	0	0	0	0	163.927
	0	1	2	4	1	0	1	0	0	0	164.139
	0	2	3	4	0	0	0	0	0	0	164.711
	1	2	2	3	0	0	0	0	0	0	166.031
	1	2	2	6	0	0	0	0	0	0	167.405
	0	0	0	1	0	0	0	0	1	0	174.935
	0	1	1	3	0	0	0	0	1	0	185.496
	0	3	5	5	0	1	0	0	0	0	199.749
	0	0	1	1	0	0	0	0	0	1	244.829
	0	1	1	3	0	0	0	0	1	0	247.193
	0	2	2	2	0	0	0	0	0	2	257.345
	0	5	7	7	0	0	0	0	0	0	295.652
	0	1	2	2	0	0	0	0	0	1	302.807
	0	1	1	2	0	0	0	0	0	0	310.257
	0	2	4	6	0	0	2	0	0	0	329.193
	0	1	1	3	0	0	0	0	0	0	351.374
	1	6	8	9	0	0	0	0	0	0	361.418
	0	2	2	2	0	0	0	0	0	2	403.268
	0	0	0	2	0	0	0	0	1	0	410.229
	0	3	3	5	0	0	0	0	0	0	421.198
	1	1	1	2	0	1	0	0	0	5	470.534
	1	1	1	2	0	1	0	0	0	5	557.028
	0	0	0	1	0	0	0	0	1	0	721.527
	3	4	4	4	0	0	0	0	0	0	727.44
	3	4	4	4	0	0	0	0	0	0	779.008
	1	3	4	5	0	0	1	0	0	0	825.052
	1	3	3	4	0	0	0	0	0	0	1389.62
Average values:->	0.24	1.46	2.07	3.57	0.01	0.05	0.19	0.01	0.06	0.6	164.513

## Sheet: Table4
Table 4. Top 10 positively correlated fingerprints and their average values for highly active and least active compounds.
Fingerprint	Highly active compounds (n=100)	Least active compounds (n=100)
SubFPC28	0.06	0.24
SubFPC181	0.56	1.46
SubFPC184	0.87	2.07
SubFPC275	1.97	3.57
SubFPC190	0	0.01
SubFPC19	0.07	0.05
SubFPC179	0.1	0.19
SubFPC30	0	0.01
SubFPC86	0.09	0.06
SubFPC135	0.44	0.6
Maximum response	-29.5613	164.513
