# Supplementary material for: ASCoVPred: a machine learning-based platform for quantitative prediction of anti-SARS-CoV-2 activity and human cell toxicity of molecules
Source: Research Square preprint supplement (doi:10.21203/rs.3.rs-967196/v1), 2021-10-13
Supplement: Supplementary file 24 [file 56449316bf4db1e3a2dd7b71.xlsx]

## Sheet: Assay-6-ML-results
Table 1. Summary of whole descriptors/fingerprints-based datasets.
Sr.No.	Descriptors / FPs Type	Total number of descriptors / FPs	Unique records	Training set molecules	Validation set molecules	Maximum descriptors allowed	Model building status
1	1D & 2D	1444	3248	2598	650	519.6	No
2	Fingerprinter	1024	3406	2725	681	545	No
3	ExtendedFingerprinter	1024	3406	2725	681	545	No
4	EStateFingerprinter	79	3393	2714	679	542.8	Yes
5	GraphOnlyFingerprinter	1024	3406	2725	681	545	No
6	MACCSFingerprinter	166	3403	2722	681	544.4	Yes
7	PubchemFingerprinter	881	3403	2722	681	544.4	No
8	SubstructureFingerprinter	307	3401	2721	680	544.2	Yes
9	SubstructureFingerprintCount	307	3404	2723	681	544.6	Yes
10	KlekotaRothFingerprinter	4860	3403	2722	681	544.4	No
11	KlekotaRothFingerprintCount	4860	3404	2723	681	544.6	No
12	AtomPairs2DFingerprinter	780	3401	2721	680	544.2	No
13	AtomPairs2DFingerprintCount	780	3406	2725	681	545	No
Table 2. Summary of selected descriptors/fingerprints-based datasets.
Sr.No.	Descriptors / FPs Type	Number of descriptors / FPs after feature selection	Unique records	Training set molecules	Validation set molecules	Maximum descriptors allowed	Model building status
1	1D & 2D	44	3248	2598	650	519.6	Yes
2	Fingerprinter	32	3372	2698	674	539.6	Yes
3	ExtendedFingerprinter	28	3376	2701	675	540.2	Yes
4	EStateFingerprinter	11	2471	1977	494	395.4	Yes
5	GraphOnlyFingerprinter	27	3110	2488	622	497.6	Yes
6	MACCSFingerprinter	14	3276	2621	655	524.2	Yes
7	PubchemFingerprinter	33	2027	1622	405	324.4	Yes
8	SubstructureFingerprinter	31	2610	2088	522	417.6	Yes
9	SubstructureFingerprintCount	19	2775	2220	555	444	Yes
10	KlekotaRothFingerprinter	147	2154	1723	431	344.6	Yes
11	KlekotaRothFingerprintCount	77	2228	1782	446	356.4	Yes
12	AtomPairs2DFingerprinter	12	1938	1550	388	310	Yes
13	AtomPairs2DFingerprintCount	15	3023	2418	605	483.6	Yes
Table 3. Best five models performance with whole and selected descriptors/fingerprints-based datasets.
	Descriptors/FPs Type	Unique records	Training Set Molecules	Validation Set Molecules	Number of descriptors / FPs used	R	MAE	RMSE	Technique Used
	EStateFingerprinter	3393	2714	679	79	0.2	13.91	38.22	weka.classifiers.meta.RandomCommittee (REPTree)
		3393	2714	679	79	0.18	14.9	39.07	weka.classifiers.meta.Bagging (M5P)
		3393	2714	679	79	0.18	17.97	48.91	weka.classifiers.trees.RandomTree
		3393	2714	679	79	0.16	14	38.55	weka.classifiers.meta.RandomSubSpace (M5P)
		3393	2714	679	79	0.15	13.86	38.57	weka.classifiers.meta.RandomSubSpace (REPTree)
	Descriptors/FPs Type	Unique records	Training Set Molecules	Validation Set Molecules	Number of descriptors / FPs used	R	MAE	RMSE	Technique Used
	MACCSFingerprinter	3403	2722	681	166	0.21	6.54	12.13	weka.classifiers.functions.GaussianProcesses (PolyKernel)
		3403	2722	681	166	0.16	14.61	38.89	weka.classifiers.functions.SMOreg (RBFKernel)
		3403	2722	681	166	0.15	13.78	38.64	weka.classifiers.functions.GaussianProcesses (Puk)
		3403	2722	681	166	0.15	14.79	38.77	weka.classifiers.functions.LinearRegression (No attribute selection)
		3403	2722	681	166	0.15	14.79	38.77	weka.classifiers.functions.GaussianProcesses (RBFKernel)
	Descriptors/FPs Type	Unique records	Training Set Molecules	Validation Set Molecules	Number of descriptors / FPs used	R	MAE	RMSE	Technique Used
	SubstructureFingerprinter	3401	2721	680	307	0.2	14.9	38.45	weka.classifiers.functions.GaussianProcesses (NormailzedPolyKernel)
		3401	2721	680	307	0.2	14.11	38.64	weka.classifiers.meta.RandomSubSpace (RandomForest)
		3401	2721	680	307	0.2	14.03	38.25	weka.classifiers.meta.RandomSubSpace (M5P)
		3401	2721	680	307	0.2	13.96	38.31	weka.classifiers.functions.SMOreg (Puk)
		3401	2721	680	307	0.19	14.58	39.62	weka.classifiers.trees.RandomForest
	Descriptors/FPs Type	Unique records	Training Set Molecules	Validation Set Molecules	Number of descriptors / FPs used	R	MAE	RMSE	Technique Used
	SubstructureFingerprintCount	3404	2723	681	307	0.19	13.79	38.41	weka.classifiers.meta.RandomCommittee (RandomForest)
		3404	2723	681	307	0.19	14.71	40.95	weka.classifiers.rules.DecisionTable (GreedyStepwise)
		3404	2723	681	307	0.19	14.71	40.95	weka.classifiers.rules.DecisionTable (BestFirst)
		3404	2723	681	307	0.19	14.71	40.95	weka.classifiers.rules.DecisionTable
		3404	2723	681	307	0.19	14.71	40.95	weka.classifiers.misc.InputMappedClassifier (DecisionTable)
	Descriptors/FPs Type	Unique records	Training Set Molecules	Validation Set Molecules	Number of descriptors / FPs used	R	MAE	RMSE	Technique Used
	1D & 2D	3248	2598	650	44	0.3	14.18	37.74	weka.classifiers.meta.RegressionByDiscretization (RandomForest)
		3248	2598	650	44	0.29	16.07	55.58	weka.classifiers.functions.MultilayerPerceptron
		3248	2598	650	44	0.28	13.81	37.98	weka.classifiers.meta.RandomSubSpace (M5P)
		3248	2598	650	44	0.27	14.15	38.09	weka.classifiers.meta.RandomSubSpace (RandomForest)
		3248	2598	650	44	0.25	14.39	38.35	weka.classifiers.meta.Bagging (RandomForest)
	Descriptors/FPs Type	Unique records	Training Set Molecules	Validation Set Molecules	Number of descriptors / FPs used	R	MAE	RMSE	Technique Used
	Fingerprinter	3372	2698	674	32	0.23	14.11	38.09	weka.classifiers.meta.RandomSubSpace (RandomForest)
		3372	2698	674	32	0.23	14.57	38.19	weka.classifiers.meta.Bagging (RandomForest)
		3372	2698	674	32	0.22	14.73	38.87	weka.classifiers.meta.RandomSubSpace (RandomTree)
		3372	2698	674	32	0.21	14.87	38.61	weka.classifiers.meta.RandomCommittee (RandomForest)
		3372	2698	674	32	0.21	13.81	38.2	weka.classifiers.meta.RandomSubSpace (REPTree)
	Descriptors/FPs Type	Unique records	Training Set Molecules	Validation Set Molecules	Number of descriptors / FPs used	R	MAE	RMSE	Technique Used
	ExtendedFingerprinter	3376	2701	675	28	0.32	14.31	37.09	weka.classifiers.trees.RandomForest
		Validation dataset performance		675	28	0.5672	16.6837	44.883
		3376	2701	675	28	0.31	14.35	37.1	weka.classifiers.meta.Bagging (RandomForest)
		3376	2701	675	28	0.31	14.34	37.18	weka.classifiers.meta.RandomCommittee (RandomForest)
		3376	2701	675	28	0.31	14.32	37.53	weka.classifiers.meta.RandomSubSpace (RandomTree)
		3376	2701	675	28	0.29	15.02	37.87	weka.classifiers.meta.AdditiveRegression (RandomForest)
	Descriptors/FPs Type	Unique records	Training Set Molecules	Validation Set Molecules	Number of descriptors / FPs used	R	MAE	RMSE	Technique Used
	EStateFingerprinter	2471	1977	494	11	0.08	13.31	40.04	weka.classifiers.functions.SMOreg (PolyKernel)
		2471	1977	494	11	0.08	13.3	40.04	weka.classifiers.functions.SMOreg (RBFKernel)
		2471	1977	494	11	0.07	14.69	39.65	weka.classifiers.functions.GaussianProcesses (RBFKernel)
		2471	1977	494	11	0.07	14.73	39.75	weka.classifiers.functions.GaussianProcesses (PolyKernel)
		2471	1977	494	11	0.07	14.57	39.64	weka.classifiers.meta.RandomSubSpace (REPTree)
	Descriptors/FPs Type	Unique records	Training Set Molecules	Validation Set Molecules	Number of descriptors / FPs used	R	MAE	RMSE	Technique Used
	GraphOnlyFingerprinter	3110	2488	622	27	0.19	13.95	39.7	weka.classifiers.lazy.KStar (Normalize over the attributes)
		3110	2488	622	27	0.19	13.95	39.7	weka.classifiers.lazy.KStar (Average column entropy curves)
		3110	2488	622	27	0.17	13.7	40.11	weka.classifiers.functions.SMOreg (Puk)
		3110	2488	622	27	0.16	14.45	40.29	weka.classifiers.meta.RandomizableFilteredClassifier (KStar)
		3110	2488	622	27	0.15	14.88	40.76	weka.classifiers.lazy.IBk
	Descriptors/FPs Type	Unique records	Training Set Molecules	Validation Set Molecules	Number of descriptors / FPs used	R	MAE	RMSE	Technique Used
	MACCSFingerprinter	3276	2621	655	14	0.19	13.86	38.8	weka.classifiers.meta.RandomSubSpace (RandomForest)
		3276	2621	655	14	0.19	13.88	38.81	weka.classifiers.meta.RandomSubSpace (RandomTree)
		3276	2621	655	14	0.18	13.88	38.97	weka.classifiers.meta.RandomSubSpace (REPTree)
		3276	2621	655	14	0.18	12.94	39.45	weka.classifiers.functions.SMOreg (RBFKernel)
		3276	2621	655	14	0.17	14.18	39.07	weka.classifiers.meta.Bagging (M5P)
	Descriptors/FPs Type	Unique records	Training Set Molecules	Validation Set Molecules	Number of descriptors / FPs used	R	MAE	RMSE	Technique Used
	PubchemFingerprinter	2027	1622	405	33	0.09	13.74	40.82	weka.classifiers.functions.SMOreg (Puk)
		2027	1622	405	33	0.08	13.45	40.77	weka.classifiers.functions.SMOreg (RBFKernel)
		2027	1622	405	33	0.07	14.76	40.39	weka.classifiers.meta.RegressionByDiscretization (DecisionStump)
		2027	1622	405	33	0.06	15.21	41.11	weka.classifiers.functions.GaussianProcesses (Puk)
		2027	1622	405	33	0.06	14.72	40.42	weka.classifiers.functions.GaussianProcesses (RBFKernel)
	Descriptors/FPs Type	Unique records	Training Set Molecules	Validation Set Molecules	Number of descriptors / FPs used	R	MAE	RMSE	Technique Used
	SubstructureFingerprinter	2610	2088	522	31	0.18	13.11	38.63	weka.classifiers.functions.SMOreg (NormalizedPolyKernel)
		2610	2088	522	31	0.14	13.05	38.98	weka.classifiers.functions.SMOreg (RBFKernel)
		2610	2088	522	31	0.14	14.4	38.53	weka.classifiers.functions.GaussianProcesses (RBFKernel)
		2610	2088	522	31	0.13	14.24	38.69	weka.classifiers.meta.RandomSubSpace (REPTree)
		2610	2088	522	31	0.12	13.72	38.68	weka.classifiers.lazy.KStar (Normalize over the attributes)
	Descriptors/FPs Type	Unique records	Training Set Molecules	Validation Set Molecules	Number of descriptors / FPs used	R	MAE	RMSE	Technique Used
	SubstructureFingerprintCount	2775	2220	555	19	0.12	13.41	42.46	weka.classifiers.functions.SMOreg (RBFKernel)
		2775	2220	555	19	0.11	14.19	42.18	weka.classifiers.lazy.KStar (Normalize over the attributes)
		2775	2220	555	19	0.11	14.19	42.18	weka.classifiers.lazy.KStar (Average column entropy curves)
		2775	2220	555	19	0.1	14.92	42.49	weka.classifiers.functions.GaussianProcesses (RBFKernel)
		2775	2220	555	19	0.1	14.92	42.49	weka.classifiers.functions.GaussianProcesses (Puk)
	Descriptors/FPs Type	Unique records	Training Set Molecules	Validation Set Molecules	Number of descriptors / FPs used	R	MAE	RMSE	Technique Used
	KlekotaRothFingerprinter	2154	1723	431	147	0.19	13.56	41.83	weka.classifiers.functions.SMOreg (RBFKernel)
		2154	1723	431	147	0.16	14.91	41.53	weka.classifiers.meta.RandomSubSpace (RandomTree)
		2154	1723	431	147	0.16	13.72	41.85	weka.classifiers.functions.SMOreg (Puk)
		2154	1723	431	147	0.16	15.51	43	weka.classifiers.functions.LinearRegression (No attribute selection)
		2154	1723	431	147	0.15	14.88	41.58	weka.classifiers.meta.RandomSubSpace (RandomForest)
	Descriptors/FPs Type	Unique records	Training Set Molecules	Validation Set Molecules	Number of descriptors / FPs used	R	MAE	RMSE	Technique Used
	KlekotaRothFingerprintCount	2228	1782	446	77	0.2	13.85	40.92	weka.classifiers.lazy.KStar (Normalize over the attributes)
		2228	1782	446	77	0.2	13.85	40.92	weka.classifiers.lazy.KStar (Average column entropy curves)
		2228	1782	446	77	0.18	14.92	41.04	weka.classifiers.meta.RandomizableFilteredClassifier (LWL)
		2228	1782	446	77	0.18	15.58	42.63	weka.classifiers.trees.RandomForest
		2228	1782	446	77	0.18	15.62	42.73	weka.classifiers.meta.RandomCommittee (RandomForest)
	Descriptors/FPs Type	Unique records	Training Set Molecules	Validation Set Molecules	Number of descriptors / FPs used	R	MAE	RMSE	Technique Used
	AtomPairs2DFingerprinter	1938	1550	388	12	-0.06	15.01	41.36	weka.classifiers.meta.AdditiveRegression (M5P)
		1938	1550	388	12	-0.06	15.01	41.36	weka.classifiers.meta.CVParameterSelection (M5Rules)
		1938	1550	388	12	-0.06	15.01	41.36	weka.classifiers.meta.CVParameterSelection (ZeroR)
		1938	1550	388	12	-0.06	15.01	41.36	weka.classifiers.meta.MultiScheme
		1938	1550	388	12	-0.06	15.01	41.36	weka.classifiers.meta.RandomSubSpace (M5P)
	Descriptors/FPs Type	Unique records	Training Set Molecules	Validation Set Molecules	Number of descriptors / FPs used	R	MAE	RMSE	Technique Used
	AtomPairs2DFingerprintCount	3023	2418	605	15	0.09	14.34	40.53	weka.classifiers.meta.RegressionByDiscretization (DecisionStump)
		3023	2418	605	15	0.08	14.61	40.96	weka.classifiers.trees.RandomTree
		3023	2418	605	15	0.08	14.61	40.96	weka.classifiers.meta.AdditiveRegression (RandomTree)
		3023	2418	605	15	0.07	14.3	40.59	weka.classifiers.functions.GaussianProcesses (Puk)
		3023	2418	605	15	0.07	13.99	40.59	weka.classifiers.lazy.KStar (Normalize over the attributes)
