# Supplementary material for: ASCoVPred: a machine learning-based platform for quantitative prediction of anti-SARS-CoV-2 activity and human cell toxicity of molecules
Source: Research Square preprint supplement (doi:10.21203/rs.3.rs-967196/v1), 2021-10-13
Supplement: Supplementary file 25 [file 72522448c6c5ae7f4934b55d.xlsx]

## Sheet: Table1
Table 1. Top 10 positively correlated fingerprints with maximum response.
Fingerprint	Pearson Correlation Coefficient (R) value
GATS1p	0.228616
MATS2c	0.155294
GATS2m	0.123663
nAcid	0.120527
AATSC2e	0.108574
MATS2e	0.104888
GATS5e	0.0946658
maxssssNp	0.0872773
nssssNp	0.0843155
nF7Ring	0.0727235

## Sheet: Table2
	Table 2. Highly active 100 compounds containing top 10 positively correlated fingerprints and their maximum response values.
	GATS1p	MATS2c	GATS2m	nAcid	AATSC2e	MATS2e	GATS5e	maxssssNp	nssssNp	nF7Ring	Maximum response
	1.14608	-0.244426	0.910256	0	-0.005497	-0.282524	0.397055	0	0	0	-99.4652
	0.829488	0.059469	0.821884	0	0.002802	0.149513	1.07692	0	0	0	-99.4482
	1.25966	0.062122	0.825167	0	0.026685	0.407422	0.637006	0	0	0	-99.4094
	1.05908	-0.229563	0.934201	0	-0.004371	-0.266578	0.451124	0	0	0	-99.1154
	0.966031	0.279513	1.12288	1	0.026553	0.262217	0.977726	0	0	0	-99.0596
	0.913081	-0.074143	0.81724	2	-0.008246	-0.05194	0.912421	0	0	0	-98.768
	1.32377	-0.053152	0.571607	0	0.033908	0.32257	0.707337	0	0	0	-98.7554
	1.03512	-0.08931	0.933968	0	-0.014484	-0.138591	0.870554	0	0	0	-98.6337
	1.35076	-0.010137	0.482996	0	0.053942	0.382176	1.12931	0	0	0	-98.5019
	0.805858	-0.001588	0.617403	0	0.000846	0.019488	0.441444	0	0	0	-98.2839
	1.17904	0.08554	0.796175	0	0.001599	0.039824	0.623775	0	0	0	-98.2828
	1.05903	-0.061554	0.952745	0	-0.003339	-0.063242	0.654651	0	0	0	-98.2738
	1.21121	0.05035	0.700029	0	0.02118	0.190459	1.53821	0	0	0	-98.221
	1.06925	-0.055787	0.829711	0	-0.000668	-0.034232	0.614682	0	0	0	-97.6835
	1.08034	-0.267942	1.01654	0	-0.00395	-0.145891	1.1579	0	0	0	-97.6198
	0.761058	0.083444	0.752836	0	7.2e-05	0.001235	0.969842	0	0	0	-97.5438
	0.875886	-0.064402	0.868488	0	-0.004797	-0.069959	0.95238	0	0	0	-97.3866
	0.531307	-0.130773	0.583289	0	-0.009531	-0.183375	0.462049	0	0	0	-97.2143
	0.758906	0.127948	0.804776	0	0.001245	0.052631	0.332835	0	0	0	-96.7274
	1.03529	0.069026	0.814815	0	0.001235	0.21	1	0	0	0	-96.6363
	0.94984	-0.26035	0.767735	0	-0.005828	-0.214077	0.355034	0	0	0	-96.6037
	0.995173	-0.188116	0.830952	0	-0.003331	-0.08899	1.38566	0	0	0	-96.2663
	0.995173	-0.266844	1.01089	0	-0.006671	-0.178226	1.01284	0	0	0	-96.0995
	0.987157	0.05147	0.867715	0	0.001153	0.023493	0.877131	0	0	0	-95.9317
	0.974174	0.103669	0.765835	0	0.010044	0.116761	0.887776	0	0	0	-95.7745
	1.05951	0.105405	0.792231	0	0.016308	0.214461	1.35753	0	0	0	-95.6904
	1.05613	-0.02262	0.859418	0	4e-05	0.001062	0.723516	0	0	0	-95.227
	0.950024	0.00809	0.633626	1	0.019379	0.148555	0.69418	0	0	0	-95.1966
	1.21957	-0.099752	0.909573	0	-0.004728	-0.048895	0.972696	0	0	0	-95.0435
	1.10907	0.120255	0.836354	0	0.009896	0.153892	0.684143	0	0	0	-95.015
	1.20381	-0.004329	0.846185	0	-0.001662	-0.030318	0.935295	0	0	0	-94.8866
	0.944043	-0.300017	0.991177	0	-0.0045	-0.201825	0.81578	0	0	0	-94.7343
	0.667786	-0.108996	0.844847	0	0.000892	0.04707	0.982628	0	0	0	-94.4006
	1.26807	-0.024885	0.827978	0	-0.000116	-0.000955	1.15619	0	0	0	-94.0208
	0.828408	-0.094659	0.717511	0	-0.001841	-0.064276	0.576549	0	0	0	-94.0161
	0.439033	-0.14643	0.627608	0	-0.004001	-0.064173	1.53573	0	0	0	-93.9799
	0.597026	-0.291214	0.758767	0	0.005535	0.043854	1.43067	0	0	0	-93.9209
	1.31206	0.023393	0.957375	0	0.006401	0.082609	1.28241	0	0	0	-93.764
	0.477134	-0.11591	0.661143	0	0.000951	0.006951	0.733359	0	0	0	-93.625
	0.809984	0.01624	0.845655	0	0.001006	0.020384	0.772277	0	0	0	-93.1837
	1.13396	-0.050203	0.830799	0	-0.007138	-0.055307	1.06703	0	0	0	-93.1231
	0.772042	-0.025729	0.550345	0	-0.00241	-0.02432	0.843874	0	0	0	-93.0077
	1.33053	-0.031693	0.859359	0	0.003918	0.034402	0.956238	0	0	0	-92.9411
	1.34177	0.000192	1.02822	0	0.006189	0.095206	0.98108	0	0	0	-92.8747
	1.04564	-0.161443	1.22267	0	-0.001797	-0.0442	1.47541	0	0	0	-92.57
	0.884263	-0.100723	0.639604	0	-0.006347	-0.067803	0.920429	0	0	0	-92.3703
	0.924944	-0.029275	0.612363	0	-0.004852	-0.035077	1.07634	0	0	0	-92.3069
	0.799234	-0.044504	0.560941	0	-0.005856	-0.042535	1.08713	0	0	0	-92.2309
	0.861141	0.08114	0.900026	0	0.007286	0.136443	1.12919	0	0	0	-92.0788
	1.35076	-0.00407	0.482996	0	0.053942	0.382176	0.825608	0	0	0	-92.0332
	0.678441	-0.073623	0.621916	0	-0.002195	-0.017477	1.22638	0	0	0	-91.947
	0.90186	-0.111194	0.639711	1	0.013415	0.162264	1.24413	0	0	0	-91.9368
	1.32295	-0.165012	0.901825	0	-0.01025	-0.099315	1.00679	0	0	0	-91.729
	0.794051	0.00729	0.606259	0	0.000829	0.014506	0.766058	0	0	0	-91.6044
	0.975955	-0.325818	1.06943	0	-0.003696	-0.306674	1.2501	0	0	0	-91.3476
	1.14652	-0.018208	0.764058	0	-0.005925	-0.074394	1.40767	0	0	0	-91.0003
	1.24126	-0.026478	0.815428	0	0.003189	0.033332	0.817506	0	0	0	-90.5152
	1.11569	-0.01499	0.888184	0	0.002521	0.02325	0.970762	0	0	0	-90.4105
	1.07726	-0.017086	0.966146	0	-0.000449	-0.004445	0.948187	0	0	0	-90.3653
	0.980906	-0.060717	0.810793	0	0.002581	0.029748	0.519271	0	0	0	-90.3439
	1.0584	-0.097144	0.766694	0	0.002099	0.071939	1.60953	0	0	0	-89.9597
	0.872191	0.037403	0.755728	0	-0.002246	-0.042854	0.710538	0	0	0	-89.9191
	1.20584	-0.122323	0.762732	0	0.010921	0.189982	0.61929	0	0	0	-89.8254
	0.46934	0.059736	0.5856	0	0.006046	0.079424	1.06685	0	0	0	-89.5947
	1.24842	0.009488	0.82235	0	0.007285	0.130733	1.37702	0	0	0	-89.4071
	0.735976	-0.138751	0.622152	0	-0.015042	-0.166892	1.15353	0	0	0	-89.3783
	1.0649	-0.072638	0.903389	0	-0.002802	-0.026528	0.701042	0	0	0	-89.0977
	1.18191	-0.089632	0.839343	0	-0.014152	-0.104143	0.967796	0	0	0	-89.0725
	0.732663	-0.127176	0.644298	0	-0.014126	-0.167359	1.07011	0	0	0	-88.9883
	0.723601	-0.041103	0.697357	0	0.000218	0.002216	1.7922	0	0	0	-88.9863
	1.10238	-0.03622	0.971301	0	0.008186	0.182401	1.44246	0	0	0	-88.9255
	1.15105	0.142063	0.828797	0	0.015066	0.204256	1.25949	0	0	0	-88.9217
	1.07493	-0.072856	0.715869	0	-0.005279	-0.059024	0.896536	0	0	0	-88.89
	0.982757	0.102096	1.02495	0	0.011401	0.1845	1.34861	0	0	0	-88.8646
	0.888327	-0.049359	0.632441	0	-0.004836	-0.036795	1.11761	0	0	0	-88.7885
	1.40069	-0.075517	1.00443	0	0.006997	0.136254	1.37924	0	0	0	-88.4743
	0.737138	0.142292	0.618071	1	0.026039	0.180513	1.10658	0	0	0	-88.4287
	1.14502	-0.219328	0.871413	0	-0.006476	-0.086043	1.06322	0	0	0	-88.3881
	0.801131	-0.092521	0.791905	0	-0.005482	-0.050962	0.774864	0	0	0	-88.3121
	1.30649	-0.015309	0.961703	0	0.004049	0.040896	0.973444	0	0	0	-88.2747
	1.02216	0.182284	0.653302	4	0.024074	0.242949	0.652475	0	0	0	-88.27
	1.16021	-0.072758	0.700231	0	0.022089	0.126178	0.957162	0	0	0	-88.27
	1.15428	0.086299	0.762042	1	0.009921	0.162251	1.15847	0	0	0	-88.2006
	1.28657	-0.149526	0.907411	0	-0.008923	-0.089831	1.12498	0	0	0	-87.6516
	1.02554	-0.096485	0.897801	0	-0.001143	-0.020826	0.462868	0	0	0	-87.6421
	1.25116	0.000539	0.76972	0	0.005888	0.06408	0.831457	0	0	0	-87.5898
	0.399327	-0.108224	0.61136	0	-0.008106	-0.055371	0.989646	0	0	0	-87.5314
	1.31456	-0.095352	0.886638	1	-0.026102	-0.120072	1.00181	0	0	0	-87.4614
	0.899674	-0.111959	0.812574	0	-0.003573	-0.058778	0.846764	0	0	0	-87.4604
	1.03443	0.092029	0.816533	0	0.015625	0.184992	1.49746	0	0	0	-87.3843
	0.98827	0.008064	0.858837	0	0.001791	0.039287	0.767609	0	0	0	-87.2806
	1.25761	0.019194	0.880085	0	0.005706	0.060298	1.07613	0	0	0	-87.2663
	1.2849	-0.162499	0.911118	0	-0.007358	-0.075157	1.08156	0	0	0	-87.1284
	1.06116	-0.050966	0.747753	0	0.032749	0.298897	1.08157	0	0	0	-86.8573
	0.676966	0.030202	0.690431	0	0.002794	0.042651	1.24476	0	0	0	-86.8097
	1.00515	0.109254	0.53654	0	0.018526	0.2447	1.48907	0	0	0	-86.482
	0.887753	-0.214612	1.00234	0	-0.001952	-0.103114	0.797358	0	0	0	-86.3654
	0.898039	-0.127813	0.867025	0	-0.021016	-0.145678	1.07131	0	0	0	-86.3435
	0.976288	-0.023529	0.725486	0	-0.002247	-0.017818	1.03265	0	0	0	-86.3349
	0.709045	-0.080477	0.826767	0	-0.005157	-0.084815	0.728902	0	0	0	-86.1423
Average values:->	0.999488	-0.0465624	0.799652	0.12	0.00278518	0.0226568	0.979218	0	0	0	-92.2412

## Sheet: Table3
	Table 3. Least active 100 compounds containing top 10 positively correlated fingerprints and their maximum response values.
	GATS1p	MATS2c	GATS2m	nAcid	AATSC2e	MATS2e	GATS5e	maxssssNp	nssssNp	nF7Ring	Maximum response
	1.35914	-0.141072	1.01334	0	-0.019138	-0.132831	1.04407	0	0	0	3.15369
	0.65205	0.187381	0.58157	0	0.003757	0.04729	1.14836	0	0	0	3.1965
	1.69778	0.076437	0.894784	0	0.023942	0.217301	1.90079	0	0	0	3.21553
	0.805263	-0.21596	1.02	0	-0.000937	-0.16	1.04318	0	0	0	3.23946
	1.21644	0.144447	0.860528	0	0.00948	0.220063	1.88168	0	0	0	3.2496
	1.8019	0.223557	1.11478	1	0.074126	0.414255	2.05541	0	0	0	3.27495
	1.86	0.132739	0.931148	4	0.084261	0.371783	1.19451	0	0	0	3.28509
	1.51135	-0.082293	0.965472	0	-0.004945	-0.041744	1.39347	0	0	0	3.3003
	1.36698	-0.029746	0.895837	0	-0.005148	-0.057928	1.21532	0	0	0	3.3155
	1.00067	0.255701	0.739404	0	0.014025	0.13855	0.794252	0	0	0	3.32017
	2.00837	0.346091	0.562622	2	0.096666	0.461358	0.957594	0	0	0	3.32969
	0.948733	0.12806	0.802465	1	0.024166	0.187048	1.55043	0	0	0	3.34085
	1.07493	0.024185	0.843631	0	0.021313	0.187069	1.30598	0	0	1	3.34085
	1.22248	0.174526	0.850172	0	0.024017	0.155245	1.14238	0	0	0	3.35606
	0.613129	0.038046	1.11222	2	0.029273	0.205546	0.336179	0	0	0	3.38141
	1.37015	-0.194042	1.0279	0	0.004274	0.073988	1.94197	0.861581	1	0	3.40169
	1.50134	0.308561	0.982457	0	0.042012	0.346813	1.16203	0	0	0	3.40676
	1.06589	0.137491	0.781196	0	0.006112	0.058913	1.16044	0	0	0	3.45336
	1.0556	0.073728	1.10302	2	0.024945	0.243086	1.10434	0	0	0	3.46763
	1.19927	-0.181611	1.05828	0	0.003509	0.076385	1.76681	1.10485	1	0	3.47773
	1.24266	0.091075	0.796482	1	0.007868	0.082073	0.863518	0	0	0	3.4828
	1.00705	-0.056918	0.862004	0	0.00699	0.06707	1.11318	0	0	1	3.51995
	1.08513	-0.012789	0.91201	0	0.00404	0.068417	1.85357	0	0	0	3.56898
	1.5959	0.229359	0.860049	2	0.0916	0.456462	1.0876	0	0	0	3.57228
	0.835305	0.142434	0.506754	0	0.004289	0.035235	1.46779	0	0	0	3.59606
	0.936829	-0.195589	0.904789	0	0.000377	0.00838	1.41491	0	0	0	3.61033
	1.01965	0.09425	0.538108	0	0.081286	0.375778	1.32169	0	0	0	3.62982
	1.21165	0.031982	0.731815	0	0.01311	0.150048	1.14806	0	0	0	3.62982
	1.57253	0.364425	0.979679	0	0.022692	0.191808	1.0751	0	0	0	3.62982
	1.2	-0.136577	1.03042	0	0.000238	0.04127	0.95696	0	0	0	3.64363
	0.931966	0.149852	0.76926	1	0.025809	0.211284	0.685474	0	0	0	3.64503
	1.26824	-0.322094	0.878919	0	-0.00331	-0.073068	0	0	0	0	3.6501
	1.16717	-0.019113	0.776378	0	0.006369	0.069261	0.851656	0	0	0	3.65314
	1.25249	0.238529	0.684591	0	0.029248	0.300331	1.07821	0	0	0	3.65517
	1.37469	-0.003356	0.717504	0	0.018464	0.158954	0.769443	0	0	0	3.66531
	0.841869	-0.122601	0.57245	1	0.007352	0.052926	0.930698	0	0	0	3.67038
	1.17026	0.080346	0.868698	0	0.04118	0.276346	1.12482	0	0	0	3.68052
	1.17308	0.042628	0.839552	0	0.041033	0.293588	1.49779	0	0	1	3.68168
	1.24465	-0.090341	0.901151	0	-0.002209	-0.031193	1.04676	0	0	0	3.69572
	1.44582	0.294244	0.855869	0	0.033499	0.273606	0.654651	0	0	0	3.70071
	0.948933	0.062542	0.820139	0	0.002482	0.039405	2.30921	0	0	0	3.74352
	0.902146	0.087304	0.827896	0	0.017705	0.179031	1.09931	0	0	0	3.74828
	1.30513	-0.24548	1.05192	0	-0.02961	-0.233409	1.01309	0	0	0	3.76163
	1.29064	0.230819	0.729906	0	0.034622	0.329114	1.12342	0	0	0	3.7667
	1.79037	0.163286	0.749052	0	0.025486	0.150678	0.671674	0	0	0	3.77177
	1.12938	-0.057396	1.01669	0	-0.006262	-0.07951	1.0811	0	0	0	3.81011
	0.806606	0.077212	1.31606	1	0.022233	0.163053	1.39739	0	0	0	3.82753
	1.63943	-0.163028	1.40519	0	-0.011758	-0.281838	1.0033	0	0	0	3.8326
	1.47612	-0.03605	1.02211	0	0.004727	0.050694	0.742111	0	0	0	3.83767
	1.24663	-0.045194	0.884235	0	0.003034	0.026682	1.11717	0	0	0	3.84274
	1.37838	-0.036705	0.929633	0	0.001571	0.01265	0.842034	0	0	0	3.86244
	1.33704	-0.144092	1.01826	0	-0.028999	-0.184099	0.915366	0	0	0	3.8833
	1.55837	0.1445	1.0563	0	0.087547	0.475247	2.80613	0	0	0	3.8833
	1.29564	0.420197	0.811001	0	0.037353	0.422644	1.49253	0	0	0	3.89344
	1.36335	0.081927	0.962339	0	0.01034	0.12777	1.19517	0	0	0	3.89851
	1.25651	-0.125736	0.970047	0	0.003302	0.045899	1.38809	1.05088	1	1	3.90525
	1.52747	0.205048	1.05372	1	0.021314	0.275398	0.902778	0	0	0	3.92386
	1.11036	0.016512	0.958713	0	-0.000393	-0.005406	0.647386	0	0	0	3.93379
	1.46002	0.244717	0.816807	0	0.045763	0.280404	1.50646	0	0	0	3.9999
	1.13936	-0.065607	0.871378	0	0.002268	0.037456	0.805395	0	0	0	4.00038
	1.42711	0.166899	1.14161	1	0.016167	0.257136	0.791818	0	0	0	4.04045
	0.978812	0.072448	0.696055	1	0.02102	0.193586	0.517893	0	0	0	4.05566
	0.898648	-0.092279	0.783188	0	-0.00129	-0.04266	1.0104	0	0	0	4.09115
	1.23698	-0.324613	0.992853	0	-0.005951	-0.148089	1.75577	0	0	0	4.1165
	0.566961	0.316224	0.580951	0	0.02374	0.313238	1.34357	0	0	0	4.16212
	0.893233	0.0038	0.871355	0	0.001788	0.076383	1.66191	0	0	0	4.1824
	1.2509	0.157774	0.786008	1	0.039524	0.38521	0.857661	0	0	0	4.19761
	0.998183	0.398008	0.750058	0	0.025371	0.299499	1.12113	0	0	0	4.22394
	0.603831	-0.096223	0.509415	0	-0.000723	-0.007191	0.894665	0	0	0	4.24324
	0.537872	-0.061878	0.577583	0	-0.01391	-0.106308	0.860165	0	0	0	4.26675
	1.56718	-0.063664	1.17035	0	-0.004019	-0.055074	1.53065	0	0	0	4.27873
	0.882725	0.158285	0.722571	0	-0.004112	-0.040774	1.25022	0	0	0	4.30957
	1.37835	0.188082	0.792374	0	0.014713	0.240933	0.995599	0	0	0	4.31432
	1.52701	-0.030822	1.06527	0	0.006876	0.144639	1.68687	1.14028	1	1	4.32859
	1.54777	0.007188	0.847583	5	0.021114	0.125011	1.34658	0	0	0	4.36998
	1.08328	-0.04945	0.847512	0	0.020389	0.189738	1.35047	0	0	0	4.39994
	1.37721	-0.001605	0.868746	0	0.016734	0.115998	0.95404	0	0	1	4.4156
	1.9768	-0.099858	0.955622	0	0.003348	0.039081	1.61328	0.826667	1	0	4.45616
	1.4181	0.040656	1.07894	0	0.006246	0.090659	1.22089	0	0	0	4.48556
	1.52532	0.532002	0.827957	2	0.078686	0.58332	0.945809	0	0	0	4.49672
	1.07427	0.131657	0.864657	1	0.009217	0.080008	0.491827	0	0	0	4.52206
	0.888653	0.025286	0.865648	1	0.021951	0.186956	1.54342	0	0	1	4.52713
	0.848128	-0.220072	0.954265	0	-0.00016	-0.003675	2.10141	0	0	0	4.54234
	1.28112	0.070375	0.965686	0	0.007192	0.158135	0.970392	0	0	0	4.54264
	1.70865	0.192853	0.789504	1	0.031595	0.200304	0.871883	0	0	0	4.57783
	1.21735	0.149841	0.867848	0	0.015695	0.233745	0.707263	0	0	0	4.59497
	1.19072	0.130799	0.915073	0	0.005497	0.14113	1.50723	0	0	0	4.62826
	1.1588	0.105823	0.897895	2	0.029576	0.199807	0.754377	0	0	0	4.68059
	1.43186	0.421451	0.8494	0	0.041221	0.447644	1.5016	0	0	0	4.68936
	1.24592	0.203482	0.847779	0	0.006236	0.075228	0.62071	0	0	0	4.6995
	1.10285	-0.149825	0.812058	0	-0.011137	-0.131444	0.976879	0	0	0	4.71978
	1.11313	0.094246	0.830171	0	0.016471	0.180708	1.69354	0	0	0	4.7502
	1.24965	-0.112674	0.986561	0	-0.002935	-0.033941	1.43437	0.977676	1	1	4.75527
	1.54169	-0.110745	1.4285	0	-0.002248	-0.098822	0.697116	0	0	0	4.76034
	1.23178	0.111967	0.933203	0	0.005845	0.138161	1.46937	0	0	0	4.78999
	1.62208	0.098182	1.21091	0	0.001037	0.079819	0.837089	0	0	0	4.83756
	1.19583	-0.100676	0.976649	0	0.00466	0.060236	1.59712	0	0	1	4.87086
	1.41569	0.642347	0.965172	0	0.030129	0.576395	1.56131	0	0	0	4.89721
	0.47387	0.178519	0.638195	0	0.027833	0.223872	0.77705	0	0	0	4.92763
	0.948733	-0.009673	0.773696	1	0.027616	0.213748	2.03575	0	0	0	4.98847
Average values:->	1.22487	0.0609488	0.886376	0.35	0.0165936	0.13435	1.18959	0.0596193	0.06	0.09	3.95952

## Sheet: Table4
Table 4. Top 10 positively correlated fingerprints and their average values for highly active and least active compounds.
Fingerprint	Highly active compounds (n=100)	Least active compounds (n=100)
GATS1p	0.999488	1.22487
MATS2c	-0.0465624	0.0609488
GATS2m	0.799652	0.886376
nAcid	0.12	0.35
AATSC2e	0.00278518	0.0165936
MATS2e	0.0226568	0.13435
GATS5e	0.979218	1.18959
maxssssNp	0	0.0596193
nssssNp	0	0.06
nF7Ring	0	0.09
Maximum response	-92.2412	3.95952
