# Supplementary material for: ASCoVPred: a machine learning-based platform for quantitative prediction of anti-SARS-CoV-2 activity and human cell toxicity of molecules
Source: Research Square preprint supplement (doi:10.21203/rs.3.rs-967196/v1), 2021-10-13
Supplement: Supplementary file 26 [file b25432bf5195b5c70091e563.xlsx]

## Sheet: Table1
Table 1. Top 10 negatively correlated fingerprints with maximum response.
Fingerprint	Pearson Correlation Coefficient (R) value
SubFPC274	-0.362749
SubFPC181	-0.274966
SubFPC184	-0.274525
SubFPC275	-0.232313
SubFPC307	-0.225283
SubFPC23	-0.188299
SubFPC26	-0.184762
SubFPC180	-0.131167
SubFPC171	-0.114759
SubFPC179	-0.105823

## Sheet: Table2
	Table 2. Highly active 100 compounds containing top 10 negatively correlated fingerprints and their maximum response values.
	SubFPC274	SubFPC181	SubFPC184	SubFPC275	SubFPC307	SubFPC23	SubFPC26	SubFPC180	SubFPC171	SubFPC179	Maximum response
	16	2	2	3	20	1	1	0	1	0	-158.003
	6	1	1	3	11	1	1	0	0	0	-148.67
	18	0	0	2	31	1	1	0	0	0	-146.397
	21	2	3	3	25	2	1	0	0	1	-145.069
	6	0	0	0	7	0	0	0	0	0	-144.495
	27	2	3	3	29	1	1	1	0	0	-144.28
	21	4	5	7	21	2	2	1	0	0	-143.984
	27	1	2	3	32	0	0	0	0	0	-143.673
	0	0	0	1	10	0	0	0	0	0	-143.245
	21	2	3	4	22	1	1	1	0	0	-143.131
	12	0	0	0	15	1	0	0	0	0	-143.072
	30	4	6	6	28	0	0	1	0	0	-142.818
	15	3	4	4	13	0	0	1	1	0	-142.594
	21	2	3	5	24	2	2	1	0	0	-142.522
	9	0	1	2	13	0	0	0	0	1	-142.019
	21	0	1	2	27	2	2	1	0	0	-141.982
	18	0	0	0	24	0	0	0	0	0	-140.987
	15	0	1	1	19	1	1	0	0	0	-140.807
	16	2	2	2	19	1	1	0	2	0	-140.397
	21	2	3	5	23	2	2	0	0	1	-140.016
	0	0	0	3	23	0	0	0	0	0	-139.754
	6	0	0	0	7	0	0	0	0	0	-139.522
	23	1	2	3	27	0	0	1	2	0	-139.415
	26	2	2	4	28	0	0	0	0	0	-139.231
	12	0	0	0	16	0	0	0	0	0	-139.227
	0	0	0	3	16	0	0	0	0	0	-138.367
	21	2	3	4	22	1	0	0	1	1	-137.998
	15	2	3	3	19	0	0	1	0	0	-137.887
	18	0	0	4	25	1	1	0	1	0	-137.599
	16	3	3	3	16	1	1	0	1	0	-137.333
	22	1	1	5	28	1	1	0	0	0	-137.327
	16	2	2	2	17	0	0	0	0	0	-137.164
	16	2	2	3	17	1	1	0	2	0	-137.121
	17	1	2	4	16	0	0	0	0	1	-137.056
	28	2	2	5	34	2	2	0	0	0	-136.952
	11	3	4	6	9	0	0	1	0	0	-136.934
	16	2	2	5	19	2	2	0	0	0	-136.904
	12	0	0	0	14	0	0	0	0	0	-136.894
	26	3	5	5	28	0	0	1	0	1	-136.823
	6	0	0	0	18	0	0	0	0	0	-136.616
	33	3	4	4	32	0	0	1	0	0	-136.568
	14	1	2	2	13	1	0	0	0	0	-136.441
	0	0	0	1	5	0	0	0	0	0	-136.408
	17	0	1	4	26	1	1	0	1	1	-136.404
	0	0	0	1	22	0	0	0	0	0	-136.4
	16	2	2	2	20	0	0	0	0	0	-136.387
	17	4	5	5	18	0	0	1	0	0	-136.254
	18	0	0	3	24	1	1	0	0	0	-135.919
	25	1	2	2	27	0	0	1	0	0	-135.864
	20	2	2	2	23	0	0	0	0	0	-135.808
	22	2	2	4	23	1	0	0	0	0	-135.761
	0	0	0	1	8	0	0	0	0	0	-135.704
	21	5	6	8	19	0	0	0	0	0	-135.678
	6	0	0	5	23	0	0	0	0	0	-135.669
	0	0	0	0	1	1	0	0	0	0	-135.65
	0	0	0	1	15	0	0	0	0	0	-135.599
	15	0	1	1	16	0	0	0	0	0	-135.539
	18	0	0	0	23	0	0	0	0	0	-135.391
	16	2	2	2	19	1	1	0	2	0	-135.337
	23	0	1	3	28	0	0	1	0	0	-135.19
	0	0	0	4	10	0	0	0	0	0	-135.097
	21	3	4	5	22	1	1	1	2	0	-135.065
	0	0	0	3	21	0	0	0	0	0	-134.694
	27	2	3	3	33	1	1	0	1	1	-134.616
	9	3	4	5	10	0	0	1	0	0	-134.607
	12	2	2	6	25	2	2	0	0	0	-134.549
	20	3	5	5	20	0	0	1	2	1	-134.513
	0	0	0	6	36	0	0	0	0	0	-134.35
	24	3	3	3	29	1	1	0	0	0	-134.204
	12	1	1	2	24	0	0	0	0	0	-134.08
	16	0	0	3	23	1	1	0	0	0	-133.57
	10	2	2	2	11	0	0	0	2	0	-133.52
	0	0	0	2	18	0	0	0	0	0	-133.279
	18	2	2	3	23	0	0	0	0	0	-133.278
	6	0	0	3	25	0	0	0	0	0	-133.187
	0	0	0	0	0	0	0	0	0	0	-133.084
	20	2	4	4	18	1	1	0	2	0	-133.015
	18	0	0	1	23	1	1	0	0	0	-132.978
	11	0	1	2	16	0	0	0	0	0	-132.658
	10	1	1	2	14	0	0	0	0	0	-132.631
	11	1	2	2	16	0	0	1	0	0	-132.567
	12	0	0	1	21	0	0	0	0	0	-132.238
	16	2	2	2	20	0	0	0	0	0	-132.236
	0	0	0	0	1	0	0	0	0	0	-132.23
	6	0	0	0	6	0	0	0	0	0	-132.228
	18	2	2	4	22	1	0	0	1	0	-132.165
	18	2	2	5	23	1	1	0	0	0	-132.045
	24	3	5	7	26	0	0	2	0	0	-132.011
	6	0	0	0	13	0	0	0	2	0	-131.564
	6	0	0	0	7	1	0	0	0	0	-131.554
	12	1	1	2	16	0	0	0	0	0	-131.515
	0	0	0	1	10	0	0	0	0	0	-131.402
	23	2	3	9	31	2	0	1	0	0	-131.372
	21	1	2	5	26	2	1	0	0	1	-131.082
	0	0	0	6	29	0	0	0	0	0	-130.978
	0	0	0	6	46	0	0	0	0	0	-130.964
	12	3	3	8	18	1	1	0	0	0	-130.957
	6	0	0	0	7	0	0	0	0	0	-130.94
	6	0	0	1	13	0	0	0	1	0	-130.933
	18	2	2	4	27	2	2	0	0	0	-130.843
Average values:->	13.78	1.18	1.59	2.96	19.76	0.51	0.4	0.22	0.27	0.1	-136.611

## Sheet: Table3
	Table 3. Least active 100 compounds containing top 10 negatively correlated fingerprints and their maximum response values.
	SubFPC274	SubFPC181	SubFPC184	SubFPC275	SubFPC307	SubFPC23	SubFPC26	SubFPC180	SubFPC171	SubFPC179	Maximum response
	0	0	0	0	0	0	0	0	0	0	4.27412
	6	0	0	3	21	0	0	0	0	0	4.27751
	6	1	1	1	5	0	0	0	0	0	4.28047
	0	0	0	0	6	0	0	0	0	0	4.28458
	0	0	0	2	16	0	0	0	0	0	4.29204
	12	2	2	2	12	0	0	0	0	0	4.29372
	11	0	1	3	18	0	0	0	0	0	4.30236
	6	0	0	2	21	0	0	0	0	0	4.30354
	0	0	0	2	23	0	0	0	0	0	4.30461
	9	3	4	8	11	0	0	1	0	0	4.30524
	0	0	0	3	24	0	0	0	0	0	4.30683
	25	4	5	5	23	0	0	0	0	0	4.31741
	6	0	0	2	15	1	0	0	0	0	4.33267
	0	0	0	0	8	0	0	0	0	0	4.36545
	0	0	0	1	15	0	0	0	0	0	4.3741
	6	0	0	1	14	0	0	0	1	0	4.37514
	10	0	0	0	12	0	0	0	0	0	4.37962
	6	0	0	1	13	0	0	0	0	0	4.38667
	0	0	0	0	4	0	0	0	0	0	4.39822
	6	0	0	2	17	0	0	0	0	0	4.40288
	5	1	2	2	4	0	0	0	0	0	4.41226
	0	0	0	0	4	2	0	0	0	0	4.43268
	0	0	0	1	16	0	0	0	0	0	4.44237
	5	1	2	4	10	0	0	1	0	0	4.44384
	18	3	3	3	20	0	0	0	0	0	4.44742
	6	0	0	1	14	0	0	0	0	0	4.45305
	6	0	0	1	10	0	0	0	0	0	4.45522
	0	0	0	0	2	0	0	0	0	0	4.45531
	0	0	0	4	8	0	0	0	0	0	4.46168
	6	0	0	0	8	0	0	0	0	0	4.46612
	0	0	0	0	7	0	0	0	0	0	4.47472
	0	0	0	1	13	0	0	0	0	0	4.48452
	0	0	0	1	11	0	0	0	0	0	4.50301
	0	0	0	3	13	0	0	0	0	0	4.51427
	6	0	0	2	17	0	0	0	0	0	4.52478
	12	0	0	1	15	0	0	0	0	0	4.52891
	0	0	0	0	15	0	0	0	0	0	4.55782
	6	0	0	1	9	0	0	0	0	0	4.55937
	23	2	3	6	24	1	1	0	0	0	4.59352
	0	0	0	2	12	0	0	0	0	0	4.59482
	6	0	0	4	11	1	1	0	0	0	4.59521
	0	0	0	0	14	0	0	0	0	0	4.59601
	26	4	6	6	23	0	0	1	0	1	4.59833
	0	0	0	2	8	0	0	0	0	0	4.60833
	0	0	0	0	8	0	0	0	0	0	4.60964
	0	0	0	1	19	1	1	0	0	0	4.61504
	6	0	0	0	7	0	0	0	0	0	4.62633
	0	0	0	1	4	0	0	0	0	0	4.62706
	12	2	2	2	12	0	0	0	0	0	4.63682
	0	0	0	6	41	0	0	0	0	0	4.64135
	6	0	0	1	10	0	0	0	0	0	4.64196
	0	0	0	0	8	0	0	0	0	0	4.64901
	6	0	0	0	10	0	0	0	0	0	4.65645
	0	0	0	6	42	0	0	0	0	0	4.66072
	6	0	0	0	10	0	0	0	0	0	4.67086
	6	0	0	1	8	0	0	0	0	0	4.69036
	6	0	0	4	29	0	0	0	0	0	4.69807
	6	0	0	1	9	0	0	0	0	0	4.72073
	0	0	0	2	21	0	0	0	0	0	4.72985
	6	0	0	1	12	0	0	0	0	0	4.7304
	6	0	0	1	11	0	0	0	0	0	4.73654
	20	2	2	3	21	0	0	0	0	0	4.73805
	6	0	0	0	10	0	0	0	0	0	4.74309
	0	0	0	1	8	0	0	0	0	0	4.7472
	0	0	0	0	15	0	0	0	0	0	4.76295
	6	0	0	0	9	1	1	0	0	0	4.7681
	12	1	1	3	18	1	1	0	0	0	4.77496
	0	0	0	7	38	0	0	0	0	0	4.78571
	6	0	0	0	7	0	0	0	0	0	4.8089
	22	1	1	1	29	0	0	0	1	0	4.81258
	11	1	2	2	12	0	0	0	0	1	4.81321
	6	0	0	4	32	0	0	0	0	0	4.82119
	0	0	0	3	28	0	0	0	0	0	4.82121
	6	0	0	0	6	0	0	0	1	0	4.8347
	0	0	0	1	6	0	0	0	0	0	4.84627
	0	0	0	1	4	1	1	0	0	0	4.84774
	6	0	0	3	18	0	0	0	0	0	4.85211
	6	0	0	1	18	0	0	0	0	0	4.85377
	0	0	0	0	11	0	0	0	0	0	4.86944
	6	0	0	0	11	0	0	0	0	0	4.87254
	6	0	0	0	9	0	0	0	1	0	4.87389
	5	0	1	2	13	0	0	0	0	0	4.8769
	18	1	1	1	20	0	0	0	0	0	4.87817
	0	0	0	1	17	0	0	0	0	0	4.88142
	11	0	1	2	13	1	1	0	1	0	4.88523
	12	0	0	0	12	0	0	0	0	0	4.88626
	0	0	0	2	14	0	0	0	0	0	4.89497
	12	2	2	2	12	0	0	0	0	0	4.89834
	0	0	0	0	8	0	0	0	0	0	4.90458
	6	0	0	0	8	0	0	0	0	0	4.9267
	10	1	1	3	11	1	0	0	0	0	4.92948
	0	0	0	1	12	0	0	0	0	0	4.94346
	15	2	3	3	14	0	0	1	1	0	4.96971
	6	0	0	2	17	1	0	0	0	0	4.97049
	6	0	0	0	12	0	0	0	1	0	4.98311
	5	0	1	2	16	0	0	0	0	0	4.98339
	6	0	0	1	12	1	1	0	0	0	4.98382
	6	0	0	2	9	0	0	0	2	0	4.9889
	0	0	0	8	50	0	0	0	0	0	4.99642
	0	0	0	1	12	0	0	0	0	0	4.99772
Average values:->	5.37	0.34	0.47	1.73	14.19	0.13	0.08	0.04	0.09	0.02	4.64129

## Sheet: Table4
Table 4. Top 10 negatively correlated fingerprints and their average values for highly active and least active compounds.
Fingerprint	Highly active compounds (n=100)	Least active compounds (n=100)
SubFPC274	13.78	5.37
SubFPC181	1.18	0.34
SubFPC184	1.59	0.47
SubFPC275	2.96	1.73
SubFPC307	19.76	14.19
SubFPC23	0.51	0.13
SubFPC26	0.4	0.08
SubFPC180	0.22	0.04
SubFPC171	0.27	0.09
SubFPC179	0.1	0.02
Maximum response	-136.611	4.64129
