# Supplementary material for: ASCoVPred: a machine learning-based platform for quantitative prediction of anti-SARS-CoV-2 activity and human cell toxicity of molecules
Source: Research Square preprint supplement (doi:10.21203/rs.3.rs-967196/v1), 2021-10-13
Supplement: Supplementary file 27 [file d04df5fe32a8d3dfee98c373.xlsx]

## Sheet: Assay-1-ML-results
Table 1. Summary of whole descriptors/fingerprints-based datasets.
Sr.No.	Descriptors / FPs Type	Total number of descriptors / FPs	Unique records	Training set molecules	Validation set molecules	Maximum descriptors allowed	Model building status
1	1D & 2D	1444	3217	2574	643	514.8	No
2	Fingerprinter	1024	3358	2686	672	537.2	No
3	ExtendedFingerprinter	1024	3364	2691	673	538.2	No
4	EStateFingerprinter	79	3145	2516	629	503.2	Yes
5	GraphOnlyFingerprinter	1024	3326	2661	665	532.2	No
6	MACCSFingerprinter	166	3360	2688	672	537.6	Yes
7	PubchemFingerprinter	881	3358	2686	672	537.2	No
8	SubstructureFingerprinter	307	3295	2636	659	527.2	Yes
9	SubstructureFingerprintCount	307	3370	2696	674	539.2	Yes
10	KlekotaRothFingerprinter	4860	3367	2694	673	538.8	No
11	KlekotaRothFingerprintCount	4860	3375	2700	675	540	No
12	AtomPairs2DFingerprinter	780	3249	2599	650	519.8	No
13	AtomPairs2DFingerprintCount	780	3366	2693	673	538.6	No
Table 2. Summary of selected descriptors/fingerprints-based datasets.
Sr.No.	Descriptors / FPs Type	Number of descriptors / FPs after feature selection	Unique records	Training set molecules	Validation set molecules	Maximum descriptors allowed	Model building status
1	1D & 2D	61	3217	2574	643	514.8	Yes
2	Fingerprinter	36	3034	2427	607	485.4	Yes
3	ExtendedFingerprinter	46	3165	2532	633	506.4	Yes
4	EStateFingerprinter	18	2132	1706	426	341.2	Yes
5	GraphOnlyFingerprinter	23	2488	1990	498	398	Yes
6	MACCSFingerprinter	20	2765	2212	553	442.4	Yes
7	PubchemFingerprinter	53	2461	1969	492	393.8	Yes
8	SubstructureFingerprinter	49	2402	1922	480	384.4	Yes
9	SubstructureFingerprintCount	75	3081	2465	616	493	Yes
10	KlekotaRothFingerprinter	388	2291	1833	458	366.6	No
11	KlekotaRothFingerprintCount	431	2337	1870	467	374	No
12	AtomPairs2DFingerprinter	73	2350	1880	470	376	Yes
13	AtomPairs2DFingerprintCount	69	2734	2187	547	437.4	Yes
Table 3. Best five models performance with whole and selected descriptors/fingerprints-based datasets.
	Descriptors/FPs Type	Unique records	Training set molecules	Validation set molecules	Number of descriptors / FPs used	R	MAE	RMSE	Technique Used
	EStateFingerprinter	3145	2516	629	79	0.45	18.09	25.28	weka.classifiers.meta.RandomCommittee (RandomForest)
		3145	2516	629	79	0.45	18.12	25.36	weka.classifiers.trees.RandomForest
		3145	2516	629	79	0.45	18.33	25.26	weka.classifiers.meta.Bagging (RandomForest)
		3145	2516	629	79	0.44	19.35	25.49	weka.classifiers.meta.RandomSubSpace (RandomForest)
		3145	2516	629	79	0.44	18.21	25.49	weka.classifiers.meta.RegressionByDiscretization (RandomForest)
	Descriptors/FPs Type	Unique records	Training set molecules	Validation set molecules	Number of descriptors / FPs used	R	MAE	RMSE	Technique Used
	MACCSFingerprinter	3360	2688	672	166	0.59	16.82	22.97	weka.classifiers.meta.RandomCommittee (RandomForest)
		3360	2688	672	166	0.59	17.18	23.19	weka.classifiers.meta.Bagging (RandomForest)
		3360	2688	672	166	0.59	17.02	23.1	weka.classifiers.meta.RandomSubSpace (RandomForest)
		3360	2688	672	166	0.59	16.9	23.09	weka.classifiers.trees.RandomForest
		3360	2688	672	166	0.58	17.13	23.26	weka.classifiers.meta.RegressionByDiscretization (RandomForest)
	Descriptors/FPs Type	Unique records	Training set molecules	Validation set molecules	Number of descriptors / FPs used	R	MAE	RMSE	Technique Used
	SubstructureFingerprinter	3295	2636	659	307	0.55	17.35	23.74	weka.classifiers.meta.RandomSubSpace (RandomForest)
		3295	2636	659	307	0.54	16.89	23.71	weka.classifiers.meta.RandomCommittee (RandomForest)
		3295	2636	659	307	0.54	17.13	23.84	weka.classifiers.meta.Bagging (RandomForest)
		3295	2636	659	307	0.54	17.71	23.81	weka.classifiers.functions.GaussianProcesses (NormalizedPolyKernel)
		3295	2636	659	307	0.53	16.43	24.47	weka.classifiers.functions.SMOreg (NormalizedPolyKernel)
	Descriptors/FPs Type	Unique records	Training set molecules	Validation set molecules	Number of descriptors / FPs used	R	MAE	RMSE	Technique Used
	SubstructureFingerprintCount	3370	2696	674	307	0.67	14.96	21.22	weka.classifiers.meta.AdditiveRegression (RandomForest)
	Deployed on Webserver	Validation dataset performance		674	307	0.66	17.41	24.95
		3370	2696	674	307	0.66	15.57	21.61	weka.classifiers.meta.RandomCommittee (RandomForest)
		3370	2696	674	307	0.66	15.85	21.89	weka.classifiers.meta.Bagging (RandomForest)
		3370	2696	674	307	0.65	15.61	21.73	weka.classifiers.trees.RandomForest
		3370	2696	674	307	0.65	16.05	22	weka.classifiers.meta.RandomSubSpace (RandomForest)
	Descriptors/FPs Type	Unique records	Training set molecules	Validation set molecules	Number of descriptors / FPs used	R	MAE	RMSE	Technique Used
	1D & 2D	3217	2574	643	61	0.66	15.12	21.15	weka.classifiers.meta.AdditiveRegression (RandomForest)
		3217	2574	643	61	0.66	15.7	21.5	weka.classifiers.meta.RandomCommittee (RandomForest)
		3217	2574	643	61	0.65	16.11	21.79	weka.classifiers.meta.RandomSubSpace (RandomForest)
		3217	2574	643	61	0.65	16.01	21.78	weka.classifiers.meta.Bagging (RandomForest)
		3217	2574	643	61	0.64	16	21.92	weka.classifiers.meta.RegressionByDiscretization (RandomForest)
	Descriptors/FPs Type	Unique records	Training set molecules	Validation set molecules	Number of descriptors / FPs used	R	MAE	RMSE	Technique Used
	Fingerprinter	3034	2427	607	36	0.58	16.82	23.16	weka.classifiers.meta.RandomSubSpace (RandomForest)
		3034	2427	607	36	0.56	16.86	23.47	weka.classifiers.meta.Bagging (RandomForest)
		3034	2427	607	36	0.56	16.74	23.54	weka.classifiers.meta.RandomCommittee (RandomForest)
		3034	2427	607	36	0.56	17.61	23.7	weka.classifiers.meta.RandomSubSpace (REPTree)
		3034	2427	607	36	0.55	16.84	23.61	weka.classifiers.meta.RegressionByDiscretization (RandomForest)
	Descriptors/FPs Type	Unique records	Training set molecules	Validation set molecules	Number of descriptors / FPs used	R	MAE	RMSE	Technique Used
	ExtendedFingerprinter	3165	2532	633	46	0.58	16.48	22.87	weka.classifiers.meta.Bagging (RandomForest)
		3165	2532	633	46	0.58	16.46	22.9	weka.classifiers.meta.RandomSubSpace (RandomForest)
		3165	2532	633	46	0.58	16.33	22.9	weka.classifiers.meta.RandomCommittee (RandomForest)
		3165	2532	633	46	0.58	16.39	23.03	weka.classifiers.trees.RandomForest
		3165	2532	633	46	0.57	16.49	23.15	weka.classifiers.meta.RegressionByDiscretization (RandomForest)
	Descriptors/FPs Type	Unique records	Training set molecules	Validation set molecules	Number of descriptors / FPs used	R	MAE	RMSE	Technique Used
	EStateFingerprinter	2132	1706	426	18	0.33	20.78	26.93	weka.classifiers.meta.RandomSubSpace (RandomForest)
		2132	1706	426	18	0.33	20.78	26.93	weka.classifiers.meta.RandomSubSpace (RandomTree)
		2132	1706	426	18	0.32	20.41	26.85	weka.classifiers.lazy.KStar (Normalize over the attributes)
		2132	1706	426	18	0.32	20.41	26.85	weka.classifiers.lazy.KStar (Average column entropy curves)
		2132	1706	426	18	0.32	20.32	26.79	weka.classifiers.functions.LinearRegression (No attribute selection)
	Descriptors/FPs Type	Unique records	Training set molecules	Validation set molecules	Number of descriptors / FPs used	R	MAE	RMSE	Technique Used
	GraphOnlyFingerprinter	2488	1990	498	23	0.42	18.54	25.64	weka.classifiers.lazy.KStar (Normalize over the attributes)
		2488	1990	498	23	0.42	18.54	25.64	weka.classifiers.lazy.KStar (Average column entropy curves)
		2488	1990	498	23	0.42	19.33	25.7	weka.classifiers.meta.RandomSubSpace (RandomForest)
		2488	1990	498	23	0.41	19.36	25.75	weka.classifiers.functions.GaussianProcesses (RBFKernel)
		2488	1990	498	23	0.41	19.24	25.74	weka.classifiers.functions.LinearRegression (No attribute selection)
	Descriptors/FPs Type	Unique records	Training set molecules	Validation set molecules	Number of descriptors / FPs used	R	MAE	RMSE	Technique Used
	MACCSFingerprinter	2765	2212	553	20	0.48	17.88	24.75	weka.classifiers.lazy.KStar (Normalize over the attributes)
		2765	2212	553	20	0.48	17.88	24.75	weka.classifiers.lazy.KStar (Average column entropy curves)
		2765	2212	553	20	0.48	18.55	24.98	weka.classifiers.meta.RandomSubSpace (RandomTree)
		2765	2212	553	20	0.48	18.15	24.85	weka.classifiers.meta.Bagging (M5P)
		2765	2212	553	20	0.47	18.12	24.89	weka.classifiers.meta.Bagging (REPTree)
	Descriptors/FPs Type	Unique records	Training set molecules	Validation set molecules	Number of descriptors / FPs used	R	MAE	RMSE	Technique Used
	PubchemFingerprinter	2461	1969	492	53	0.54	17.58	23.98	weka.classifiers.meta.RandomSubSpace (RandomForest)
		2461	1969	492	53	0.53	17.27	24.01	weka.classifiers.meta.Bagging (REPTree)
		2461	1969	492	53	0.52	17.62	24.1	weka.classifiers.meta.RandomSubSpace (RandomTree)
		2461	1969	492	53	0.52	17.57	24.13	weka.classifiers.meta.RandomCommittee (REPTree)
		2461	1969	492	53	0.52	15.6	25.52	weka.classifiers.functions.SMOreg (NormalizedPolyKernel)
	Descriptors/FPs Type	Unique records	Training set molecules	Validation set molecules	Number of descriptors / FPs used	R	MAE	RMSE	Technique Used
	SubstructureFingerprinter	2402	1922	480	49	0.45	18.68	25.26	weka.classifiers.functions.GaussianProcesses (NormalizedPolyKernel)
		2402	1922	480	49	0.44	18.89	25.42	weka.classifiers.functions.LinearRegression (No attribute selection)
		2402	1922	480	49	0.44	18.99	25.4	weka.classifiers.functions.GaussianProcesses (PolyKernel)
		2402	1922	480	49	0.44	18.91	25.5	weka.classifiers.functions.LinearRegression (M5 method)
		2402	1922	480	49	0.44	18.91	25.5	weka.classifiers.functions.LinearRegression (Greedy method)
	Descriptors/FPs Type	Unique records	Training set molecules	Validation set molecules	Number of descriptors / FPs used	R	MAE	RMSE	Technique Used
	SubstructureFingerprintCount	3081	2465	616	75	0.6	17.04	22.97	weka.classifiers.meta.RandomSubSpace (RandomForest)
		3081	2465	616	75	0.58	16.39	22.94	weka.classifiers.meta.Bagging (M5P)
		3081	2465	616	75	0.58	16.7	23.06	weka.classifiers.functions.GaussianProcesses (Puk)
		3081	2465	616	75	0.58	16.22	23.09	weka.classifiers.meta.Bagging (RandomForest)
		3081	2465	616	75	0.58	16.11	23.28	weka.classifiers.meta.RandomCommittee (RandomForest)
	Descriptors/FPs Type	Unique records	Training set molecules	Validation set molecules	Number of descriptors / FPs used	R	MAE	RMSE	Technique Used
	AtomPairs2DFingerprinter	2350	1880	470	73	0.35	19.9	26.37	weka.classifiers.meta.RandomSubSpace (RandomForest)
		2350	1880	470	73	0.35	19.97	26.38	weka.classifiers.functions.GaussianProcesses (NormalizedPolyKernel)
		2350	1880	470	73	0.35	19.86	26.4	weka.classifiers.meta.RandomSubSpace (RandomTree)
		2350	1880	470	73	0.34	20.01	26.48	weka.classifiers.functions.GaussianProcesses (RBFKernel)
		2350	1880	470	73	0.34	19.93	26.49	weka.classifiers.trees.M5P
	Descriptors/FPs Type	Unique records	Training set molecules	Validation set molecules	Number of descriptors / FPs used	R	MAE	RMSE	Technique Used
	AtomPairs2DFingerprintCount	2734	2187	547	69	0.46	18.21	24.99	weka.classifiers.meta.Bagging (M5P)
		2734	2187	547	69	0.46	18.39	25.05	weka.classifiers.meta.RandomCommittee (REPTree)
		2734	2187	547	69	0.46	18.43	25.07	weka.classifiers.functions.GaussianProcesses (Puk)
		2734	2187	547	69	0.45	18.22	25.18	weka.classifiers.meta.Bagging (REPTree)
		2734	2187	547	69	0.45	18.13	25.39	weka.classifiers.meta.Bagging (RandomForest)
