# Supplementary material for: ASCoVPred: a machine learning-based platform for quantitative prediction of anti-SARS-CoV-2 activity and human cell toxicity of molecules
Source: Research Square preprint supplement (doi:10.21203/rs.3.rs-967196/v1), 2021-10-13
Supplement: Supplementary file 28 [file e254ed455c0abea6e6f3d5b6.xlsx]

## Sheet: Table1
Table 1. Top 10 negatively correlated fingerprints with maximum response.
Fingerprint	Pearson Correlation Coefficient (R) value
TpiPC	-0.286917
nAromBond	-0.285396
naAromAtom	-0.282371
nBondsM	-0.275855
nAtomP	-0.270834
nwHBa	-0.267399
ETA_Beta_ns	-0.266019
piPC10	-0.265546
SwHBa	-0.262034
piPC9	-0.261165

## Sheet: Table2
	Table 2. Highly active 100 compounds containing top 10 negatively correlated fingerprints and their maximum response values.
	TpiPC	nAromBond	naAromAtom	nBondsM	nAtomP	nwHBa	ETA_Beta_ns	piPC10	SwHBa	piPC9	Maximum response
	10.1541	24	22	25	28	21	24	9.22524	19.9522	8.77879	-99.9804
	6.17587	0	0	0	0	0	0	3.80666	0	4.04305	-99.9567
	9.45631	22	21	24	26	21	26	8.40754	23.968	7.93876	-99.9339
	8.19521	11	11	14	18	13	16	6.71273	13.3262	6.62862	-99.9133
	8.42513	18	18	20	26	19	23	7.10228	14.5225	6.75489	-99.9022
	8.62317	0	0	6	6	8	12	7.31389	7.14884	7.05704	-99.8951
	10.505	29	25	30	28	24	27	9.63919	29.5017	9.16272	-99.8837
	8.86851	23	22	23	12	20	23	7.62878	34.4638	7.46827	-99.8712
	9.61359	21	19	21	21	16	20	8.5484	26.3032	8.14253	-99.8699
	8.95203	18	17	18	13	14	19.5	7.76486	16.5833	7.47821	-99.8649
	10.3148	22	19	23	21	18	20.5	9.41027	26.7119	8.93421	-99.8359
	7.77881	12	12	15	13	15	20	5.8295	21.6187	6.20279	-99.8338
	8.23944	6	6	10	15	7	12.5	6.63988	9.55879	6.57211	-99.8279
	9.72668	6	6	14	15	19	17.5	8.67207	13.588	8.31118	-99.8265
	9.76738	27	24	28	27	21	26	8.66286	31.2692	8.37706	-99.8265
	8.41468	12	12	15	21	16	17.5	6.92227	14.6732	6.72338	-99.824
	9.05101	12	12	16	22	19	19	7.85943	34.8739	7.5868	-99.8238
	10.2455	40	36	40	16	32	36.5	9.19639	56.995	8.83279	-99.8044
	8.69637	18	18	18	8	18	19.5	7.48589	30.7412	7.16781	-99.8
	8.90231	12	12	16	21	19	18.5	7.65682	35.4892	7.44055	-99.7987
	10.3341	25	22	27	25	24	25	9.4612	27.0621	8.96323	-99.7911
	9.27911	22	21	24	29	21	25.5	8.20753	30.9976	7.76383	-99.7853
	6.36604	6	6	8	9	8	9.5	3.84079	9.82571	3.94279	-99.7804
	8.7524	23	22	25	13	23	25.5	7.24914	30.4836	7.23927	-99.778
	9.49721	16	15	18	22	16	18.5	8.44441	13.3582	8.05552	-99.778
	9.76803	23	21	23	23	18	22	8.75415	28.0716	8.3488	-99.7751
	8.14587	18	18	19	6	19	21.5	6.48184	36.0852	6.30605	-99.7746
	9.17155	17	16	19	23	17	21.5	7.98226	17.3736	7.78271	-99.7721
	9.31447	22	21	23	20	20	24.5	8.20951	19.2651	7.78412	-99.7684
	9.6028	23	21	23	24	18	22.5	8.56961	27.3262	8.13323	-99.7684
	8.183	12	12	12	6	12	13	6.82053	24.0462	6.63677	-99.7673
	7.63868	12	12	14	13	14	15.5	6.00219	17.1751	5.64478	-99.7663
	9.42103	18	17	21	25	20	22	8.38369	25.5491	7.95744	-99.7662
	6.39024	0	0	0	0	0	0	4.14314	0	4.31749	-99.7654
	9.59885	23	21	23	16	18	21.5	8.5878	30.5923	8.18009	-99.7645
	7.63824	11	11	11	6	9	11	6.13269	17.9539	6.00319	-99.764
	8.7097	21	19	21	10	18	19	7.13973	33.3616	7.13483	-99.761
	7.69074	12	12	13	7	13	14.5	5.88245	16.6913	5.96679	-99.7603
	9.79498	29	27	31	25	26	32.5	8.7698	24.9477	8.37354	-99.7578
	9.5772	24	24	24	16	24	26	8.5033	31.4307	8.13332	-99.7575
	9.0258	18	18	20	26	19	22.5	7.8684	24.6636	7.5608	-99.7563
	7.74932	0	0	6	5	9	9	6.03787	8.81219	5.92426	-99.7553
	9.47543	27	24	27	16	20	24.5	8.30574	31.5211	7.96047	-99.7453
	8.69626	12	12	12	13	12	12	7.44717	16.6057	7.26366	-99.7442
	9.49648	22	21	24	30	20	26	8.44661	15.2553	7.97695	-99.7418
	8.64047	0	0	6	6	8	12	7.32119	5.50502	7.06987	-99.7413
	6.22183	6	6	6	6	5	6	3.86204	10.6526	3.88285	-99.7399
	9.37809	15	13	15	13	12	14	8.12666	21.6352	7.90638	-99.7379
	8.86851	23	22	23	12	20	23	7.62878	34.4638	7.46827	-99.7378
	8.47157	0	0	5	4	9	6.5	7.07581	10.9041	6.83303	-99.736
	9.37159	17	16	18	22	16	22	8.18882	20.3576	7.99885	-99.733
	8.97842	23	22	24	20	22	25	7.66741	29.8589	7.56162	-99.7323
	10.3268	27	24	27	19	17	24.5	9.4589	24.7207	8.93714	-99.7295
	8.99432	23	22	23	11	20	23.5	7.57937	36.6998	7.52036	-99.7295
	9.4484	22	21	22	24	17	23	8.40729	18.8494	7.96908	-99.7263
	9.28926	18	18	22	30	23	25	8.16872	26.613	7.81745	-99.726
	8.62815	12	11	15	18	12	16	7.3773	9.05363	7.15549	-99.7222
	8.58913	11	11	14	17	13	15.5	7.22931	7.78922	7.12799	-99.7222
	9.78641	21	19	21	15	16	20	8.77275	25.2174	8.40282	-99.7222
	8.86858	11	10	11	10	9	10	7.43743	-0.170901	7.44535	-99.7208
	9.11794	23	21	24	12	20	23	7.80737	34.6906	7.56664	-99.7198
	8.51931	12	12	13	13	13	14	7.26843	23.1702	6.98034	-99.7163
	8.1277	0	0	3	4	4	4.5	6.59851	1.09584	6.40192	-99.7163
	8.83098	0	0	6	11	10	9	7.60689	9.07586	7.37275	-99.7116
	8.97144	18	18	18	8	18	19	7.78161	32.0005	7.50671	-99.7064
	8.71327	12	12	13	15	13	14	7.46211	18.022	7.25398	-99.7051
	8.89976	19	18	19	14	16	20	7.72784	22.2384	7.41759	-99.705
	8.86858	11	10	11	10	9	10	7.43743	-0.170901	7.44535	-99.7046
	8.5941	6	6	9	12	10	11	7.26423	3.88937	7.10332	-99.7043
	8.36425	17	16	18	10	17	20	6.4615	28.6438	6.86523	-99.703
	6.87018	6	6	6	6	6	6	4.80351	11.2675	5.07752	-99.6993
	10.1289	26	23	27	24	22	24.5	9.22469	28.5855	8.74341	-99.6977
	9.28133	17	16	19	23	17	21.5	8.13959	17.1383	7.90085	-99.6972
	8.65624	12	12	13	15	13	14	7.39028	19.6486	7.20818	-99.6941
	8.10994	12	12	13	6	13	13.5	6.55188	8.81817	6.24295	-99.694
	9.17373	23	22	25	23	23	27.5	7.98474	29.54	7.77705	-99.694
	8.70409	12	12	12	13	12	12	7.45066	16.4013	7.26646	-99.693
	9.26165	12	12	15	19	17	17.5	8.16526	8.7107	7.82906	-99.6913
	9.33125	16	15	18	24	14	21.5	8.20101	15.2985	7.82491	-99.6912
	8.44169	18	17	18	11	13	18	7.13171	21.7347	6.90719	-99.6884
	9.51344	17	15	17	15	14	15	8.47114	25.0784	8.09868	-99.6884
	7.30062	6	6	6	7	6	6.5	5.36598	3.4187	5.48324	-99.6876
	8.68011	18	18	21	24	21	23	7.43216	33.5031	7.18302	-99.687
	8.79261	12	12	19	24	20	26.5	7.5286	9.51575	7.24405	-99.687
	9.094	19	18	23	12	23	24.5	7.90207	23.6485	7.54619	-99.6867
	9.42085	17	16	20	25	19	24.5	8.26376	18.9036	8.06068	-99.6854
	9.1018	19	18	22	15	21	23.5	7.83473	26.0689	7.60642	-99.6844
	9.9855	24	22	25	19	22	24	8.96297	26.4832	8.61523	-99.6844
	8.94568	22	21	22	10	19	22.5	7.69903	29.3279	7.37533	-99.6834
	8.86858	11	10	11	10	9	10	7.43743	-0.170901	7.44535	-99.6817
	9.29392	22	21	24	27	22	25	8.16241	22.4652	7.73778	-99.6815
	8.86359	18	18	21	11	22	23	7.59055	29.5537	7.35957	-99.678
	9.73321	17	15	17	16	12	15.5	8.71039	19.8737	8.32216	-99.678
	6.17587	0	0	0	0	0	0	3.80666	0	4.04305	-99.6766
	8.10425	18	18	19	8	19	19.5	6.44807	33.9525	6.33406	-99.6749
	8.36502	18	18	19	10	19	20.5	6.85776	24.5639	6.62452	-99.6749
	9.44459	22	21	23	20	18	26.5	8.30767	22.2004	8.06635	-99.6723
	8.97741	12	12	15	21	16	17	7.80565	19.5137	7.47559	-99.6708
	9.43938	17	15	17	17	12	16	8.38261	13.2873	7.98613	-99.6708
	8.74265	12	12	19	24	20	25.5	7.49568	20.2852	7.25876	-99.6679
Average values:->	8.85094	15.91	15.06	17.56	15.8	15.91	18.58	7.53383	20.5316	7.3061	-99.7501

## Sheet: Table3
	Table 3. Least active 100 compounds containing top 10 negatively correlated fingerprints and their maximum response values.
	TpiPC	nAromBond	naAromAtom	nBondsM	nAtomP	nwHBa	ETA_Beta_ns	piPC10	SwHBa	piPC9	Maximum response
	7.85205	0	0	5	6	10	7.5	6.43294	20.2036	6.2186	3.82101
	7.8501	0	0	7	5	10	9	6.13556	7.93546	5.97381	3.83402
	9.68681	18	17	23	29	23	24.5	8.66509	22.6092	8.23448	3.8381
	6.63857	0	0	4	3	4	6	4.33073	-1.55155	4.44265	3.84968
	10.4752	29	25	29	26	21	25.5	9.61274	31.9896	9.10652	3.87545
	8.47478	10	9	12	14	11	12	6.92148	13.1455	6.92179	3.89338
	10.2359	24	21	25	22	18	23.5	9.27256	26.5649	8.86211	3.90716
	7.04458	6	6	8	9	8	9	5.21085	10.5903	5.21085	3.97767
	8.34454	11	11	26	6	24	33.5	6.52136	-1.28088	6.46809	3.99073
	7.69716	11	11	13	13	12	14	6.12386	14.5441	5.92183	3.99927
	7.38871	6	6	9	14	9	15	4.67575	10.164	5.91502	4.02419
	7.69348	0	0	4	4	6	6.5	6.19644	12.2288	6.06146	4.0425
	9.13499	15	14	17	15	14	18	7.87109	18.2936	7.63232	4.06707
	5.35186	0	0	0	0	0	0	0	0	0	4.07618
	8.50269	12	12	12	7	12	12	7.30671	23.7721	7.0142	4.11342
	6.56258	6	6	7	10	7	8	4.21859	7.69003	4.30322	4.1387
	9.68183	12	12	15	7	17	16.5	8.6623	30.2311	8.26679	4.14938
	7.00715	6	6	8	9	7	9	5.06457	5.72832	5.00311	4.18376
	7.08757	0	0	5	5	8	7	5.14749	9.33359	5.17048	4.20712
	7.92239	12	12	13	13	13	15	6.45971	12.8921	6.2777	4.21275
	10.4277	34	30	35	18	27	31.5	9.52627	38.4501	9.01989	4.22994
	7.56275	6	6	8	13	9	10	5.84173	9.02091	5.77416	4.25027
	7.1333	0	0	7	3	7	10.5	4.82831	-5.25786	4.89784	4.25291
	9.48815	26	24	27	14	23	27	8.36726	22.5274	8.03154	4.30225
	9.08738	19	18	20	23	18	20.5	7.90356	19.4529	7.58488	4.36988
	8.2955	12	12	15	15	15	16.5	6.91665	18.3532	6.68109	4.41839
	8.08153	6	6	13	7	13	17	6.31219	-3.0675	6.16725	4.55777
	9.15417	22	21	23	24	19	25	7.93921	21.8414	7.72829	4.58626
	8.47786	10	9	11	14	6	12.5	6.93931	3.437	6.82897	4.64366
	8.81791	12	11	14	17	11	16	7.50434	10.5693	7.43844	4.71754
	8.76174	18	17	21	15	16	22	7.40854	15.2298	7.18197	4.7472
	7.66461	6	6	12	13	11	14.25	5.98078	7.61599	5.72031	4.79013
	9.51666	19	17	20	18	15	19	8.50524	24.1943	8.12914	4.88574
	9.50498	18	16	18	16	12	16	8.43364	19.2663	8.10166	5.0041
	5.50939	0	0	2	3	2	3	2.89037	1.33405	2.83321	5.00595
	7.46623	0	0	4	4	6	6	5.78074	7.61885	5.75574	5.08359
	7.83169	12	12	15	23	15	19.5	6.03571	2.7462	5.82701	5.14073
	8.8802	23	23	26	26	23	28.5	7.64215	27.1552	7.33954	5.21082
	7.10532	6	6	9	14	7	9.75	4.8632	7.19128	4.98318	5.35279
	8.75161	16	15	19	11	14	22	7.24416	14.649	7.09126	5.43603
	9.25538	16	14	16	15	9	14	8.07235	12.4476	7.79608	5.45941
	9.72056	18	16	20	24	15	20	8.75989	13.5387	8.30911	5.53329
	7.83928	6	6	7	10	7	7.5	6.17995	10.1923	6.04471	5.71756
	6.92645	6	6	10	6	10	12	4.68155	9.22744	4.89176	5.71828
	8.96233	18	17	19	11	16	20	7.73791	11.645	7.51807	5.81318
	8.57286	16	15	17	12	13	17	7.06567	18.1098	6.93532	5.89923
	7.63675	0	0	3	6	6	4.5	6.1717	11.8417	5.97126	5.90875
	9.12756	25	23	25	13	18	23.5	7.87847	29.0563	7.64579	6.07822
	7.61638	12	12	14	10	14	17	5.42591	11.4179	5.58185	6.13052
	7.49961	11	11	12	17	10	15	5.89664	8.68575	5.52446	6.19806
	6.43012	5	5	6	8	3	8	4.03755	2.16268	4.21859	6.26524
	9.75675	19	17	22	26	20	24.25	8.81259	22.7486	8.33657	6.40479
	8.40095	6	6	8	12	9	9.5	6.89464	6.35866	6.87678	6.51114
	6.17587	0	0	0	0	0	0	3.80666	0	4.04305	6.61758
	7.63675	0	0	3	6	6	4.5	6.1717	11.8417	5.97126	6.70388
	8.71883	0	0	2	4	4	3	7.37023	7.24038	7.18841	6.73221
	6.632	0	0	8	3	8	12	4.18966	-7.53712	4.26268	6.73367
	8.018	6	6	8	10	8	9.5	6.27075	3.94349	6.39521	6.79768
	6.2691	0	0	1	3	1	1.5	3.97029	0.074358	4.07754	6.80847
	9.0822	16	15	18	18	16	19	7.8077	16.9762	7.53116	6.93174
	8.59118	17	16	18	10	16	18	7.11316	23.3109	7.13801	6.9424
	9.09135	18	18	24	9	24	28	7.89374	27.8317	7.54875	7.01119
	7.77123	6	6	11	15	13	13.5	6.41592	17.1585	6.11975	7.01926
	8.4807	12	12	14	18	13	16	7.25507	10.6415	6.9195	7.09467
	9.48903	17	15	18	19	14	17	8.42576	19.8872	8.05371	7.21866
	8.27212	12	12	14	18	14	15.5	6.83424	14.8565	6.6525	7.21916
	7.84661	12	12	14	19	15	16.5	6.4676	13.3463	6.17781	7.42036
	7.56896	12	12	12	8	12	14	5.60212	17.9178	5.54883	7.45777
	6.66696	0	0	3	6	5	4.5	4.61512	7.4764	4.65396	7.48778
	9.64865	19	17	20	20	15	18.5	8.61178	22.3504	8.26485	7.54109
	9.5113	31	29	32	33	25	31.5	8.34751	24.5399	8.04725	7.68957
	9.24318	16	14	16	15	8	14.5	7.99101	8.96694	7.79075	7.79251
	9.30501	23	21	24	26	20	24	7.98217	28.3718	7.88404	7.97759
	7.9248	0	0	6	11	10	9	6.45362	10.3756	6.32436	7.98294
	7.20638	0	0	2	3	3	2.5	5.3033	2.96033	5.35659	8.32629
	8.127	12	12	15	22	15	17.5	6.58376	20.0744	6.38856	8.48712
	7.96656	12	12	16	19	16	19	6.4832	13.0324	6.17196	8.66591
	9.93315	25	23	27	32	24	28	8.98772	26.0961	8.51365	8.73997
	7.93228	6	6	11	18	15	14	6.52668	19.5041	6.27075	8.85807
	6.11244	6	6	7	10	5	8.5	0	-2.53065	0	8.88609
	8.4145	12	12	14	9	14	15	7.05207	13.9661	6.7347	9.15523
	8.94839	17	17	19	25	17	21.5	7.79328	12.2622	7.41021	9.18818
	9.50571	17	15	18	18	13	18	8.44366	18.6318	8.07532	9.24071
	9.26749	24	24	26	25	26	29	8.04939	31.1256	7.75665	9.92447
	8.46002	24	24	26	15	25	28.5	7.04841	33.5315	6.81313	10.0344
	8.65685	6	6	9	16	10	11.5	7.20254	0.746548	7.16586	10.0401
	7.63192	0	0	3	4	6	4	6.14847	11.8692	5.98645	10.1431
	8.60648	0	0	2	3	3	2.5	7.18766	2.64672	7.01031	10.2905
	8.27212	12	12	14	18	14	15.5	6.83424	14.8565	6.6525	10.7456
	9.6667	16	14	17	18	10	18	8.54362	10.1239	8.26415	10.7665
	9.78367	24	21	24	21	16	21	8.77628	23.4255	8.43132	11.3206
	6.5903	0	0	3	8	3	4.5	4.41884	0.503454	4.63473	11.48
	9.66072	23	22	24	19	18	24	8.66377	28.5585	8.25494	12.1618
	9.49189	22	20	22	14	17	20	8.39209	27.3177	8.06804	13.121
	7.58019	0	0	3	6	6	4.5	6.10256	13.0407	5.89715	13.6191
	8.2056	18	18	19	13	19	20.5	6.90226	29.5339	6.65576	13.8159
	7.63192	0	0	3	4	6	4	6.14847	11.8692	5.98645	15.3784
	8.232	12	12	12	16	10	14.5	6.89715	10.0778	6.64155	16.5217
	8.56418	11	11	14	18	13	17	7.17623	16.062	7.02292	20.9284
	7.93228	6	6	11	18	15	14	6.52668	19.5041	6.27075	23.013
Average values:->	8.26221	11.23	10.63	13.67	13.41	12.39	14.9725	6.67096	13.932	6.50799	7.06857

## Sheet: Table4
Table 4. Top 10 negatively correlated fingerprints and their average values for highly active and least active compounds.
Fingerprint	Highly active compounds (n=100)	Least active compounds (n=100)
TpiPC	8.85094	8.26221
nAromBond	15.91	11.23
naAromAtom	15.06	10.63
nBondsM	17.56	13.67
nAtomP	15.8	13.41
nwHBa	15.91	12.39
ETA_Beta_ns	18.58	14.9725
piPC10	7.53383	6.67096
SwHBa	20.5316	13.932
piPC9	7.3061	6.50799
Maximum response	-99.7501	7.06857
