# Supplementary material for: ASCoVPred: a machine learning-based platform for quantitative prediction of anti-SARS-CoV-2 activity and human cell toxicity of molecules
Source: Research Square preprint supplement (doi:10.21203/rs.3.rs-967196/v1), 2021-10-13
Supplement: Supplementary file 29 [file f9b088a0237e4825bf5f432b.xlsx]

## Sheet: Table1
Table 1. Top 10 positively correlated fingerprints with maximum response.
Fingerprint	Pearson Correlation Coefficient (R) value
ETA_EtaP_B	0.142477
HybRatio	0.1431
meanI	0.143758
GATS1m	0.143874
GATS1p	0.147443
GATS2p	0.147794
JGI3	0.151707
JGI2	0.160674
ETA_Shape_P	0.171381
ASP-0	0.219005

## Sheet: Table2
	Table 2. Highly active 100 compounds containing top 10 positively correlated fingerprints and their maximum response values.
	ETA_EtaP_B	HybRatio	meanI	GATS1m	GATS1p	GATS2p	JGI3	JGI2	ETA_Shape_P	ASP-0	Maximum response
	0.01684	0.25	2.52778	0.640587	1.09149	0.730007	0.050323	0.080808	0.12221	0.700278	-99.9804
	-0.00093	1	1.51667	1.29307	1.33912	1.35842	0.030093	0.047619	0	0.681155	-99.9567
	0.01911	0.296296	2.51923	0.674731	1.06116	0.80763	0.045027	0.082437	0.12108	0.706932	-99.9339
	0.01862	0.133333	2.37407	0.677916	0.787429	0.872276	0.053539	0.076389	0.17007	0.713783	-99.9133
	0.02384	0.095238	2.86237	0.554002	0.919758	0.909941	0.053385	0.074074	0.18663	0.728211	-99.9022
	0.03718	0.774194	2.25225	0.926845	1.1854	0.847124	0.074049	0.143975	0.30451	0.740459	-99.8951
	0.01718	0.076923	2.64461	0.633692	0.837283	0.953982	0.036039	0.079365	0.10072	0.702108	-99.8837
	0.00123	0.090909	2	0.801955	0.915805	1.03545	0.023649	0.046784	0	0.677163	-99.8712
	0.00313	0.36	1.94271	0.847574	1.15678	0.951412	0.049722	0.049887	0.03282	0.679766	-99.8699
	0.01595	0.333333	2.15638	0.570963	0.884263	0.875522	0.045918	0.089835	0.17971	0.708345	-99.8649
	0.00337	0	2.13492	0.637354	0.759749	0.929524	0.06875	0.070175	0.03289	0.665444	-99.8359
	0.01164	0.222222	2.28048	0.506191	0.796267	0.94359	0.043561	0.069444	0.20755	0.723483	-99.8338
	0.00788	0.4375	2.15151	0.921996	1.22243	1.02249	0.039435	0.068966	0.13548	0.717557	-99.8279
	0.00505	0.192308	2.03377	0.715691	0.890175	0.970394	0.034979	0.064646	0.02012	0.673741	-99.8265
	0.03124	0.5	2.35507	0.840498	1.11194	0.978613	0.065516	0.107095	0.26154	0.72956	-99.8265
	0.03525	0.333333	2.36207	0.889783	1.03799	0.862316	0.066176	0.101852	0.28985	0.743452	-99.824
	0.01968	0.24	1.91667	0.950548	1.14608	0.600163	0.05	0.095238	0.21898	0.723528	-99.8238
	0.00216	0.2	1.92029	0.791054	0.975914	1.03068	0.038871	0.057057	0	0.667616	-99.8044
	0.00908	0.4	1.96078	0.971089	1.11901	0.976681	0.03125	0.066667	0.11134	0.703401	-99.8
	0.01422	0.173913	1.92	0.91845	1.05908	0.693924	0.049679	0.084084	0.1626	0.712448	-99.7987
	0.01994	0.272727	2.54675	0.705156	1.02937	0.835147	0.03442	0.092308	0.13174	0.710919	-99.7911
	0.00989	0.192308	2.11852	0.733271	0.968701	0.917076	0.037736	0.057613	0.0789	0.691431	-99.7853
	0.01024	0.428571	2.57895	0.922785	1.14989	1.37318	0.034375	0.050505	0.11364	0.732865	-99.7804
	0.01395	0.178571	2.29412	0.798938	0.966008	0.927114	0.043981	0.082789	0.12757	0.708199	-99.778
	0.014	0.238095	2.33333	0.732827	0.987188	0.873293	0.054888	0.077098	0.11236	0.693813	-99.778
	0.00725	0.37931	1.93982	0.851149	1.12065	0.959659	0.038194	0.068966	0.05222	0.680126	-99.7751
	0.01121	0.333333	2.04726	0.721076	0.922215	0.967789	0.042824	0.099773	0.09135	0.701347	-99.7746
	0.01166	0.291667	2.26805	0.638264	1.03019	0.912265	0.035539	0.068027	0.11702	0.703289	-99.7721
	0.00924	0.25	2.00559	0.668563	0.93587	0.871755	0.036688	0.078431	0.1045	0.689962	-99.7684
	0.01237	0.354839	2.29675	0.755341	1.08638	0.97268	0.044872	0.061538	0.0734	0.691375	-99.7684
	0.01057	0.294118	1.75957	0.560642	0.767296	0.785567	0.042279	0.09319	0.18672	0.705626	-99.7673
	0.01696	0.222222	2.52174	0.844461	0.971984	1.08441	0.056985	0.083333	0.18518	0.731288	-99.7663
	0.01332	0.230769	2.16704	0.624538	0.956863	0.831395	0.048611	0.075472	0.11819	0.695425	-99.7662
	0.01282	1	1.60417	1.33589	1.51869	1.12694	0.036905	0.078431	0.16949	0.72785	-99.7654
	0.00676	0.333333	1.90909	0.881364	1.10475	0.918923	0.030773	0.065359	0.06289	0.685538	-99.7645
	0.00363	0.666667	1.70115	1.21254	1.35313	1.24295	0.03346	0.044444	0.06993	0.709409	-99.764
	0.00454	0.142857	1.9058	0.860686	0.875289	0.992772	0.045833	0.067901	0.04425	0.68035	-99.761
	0.01652	0.48	2.20968	0.895223	1.26308	0.999661	0.026163	0.075758	0.14462	0.716676	-99.7603
	0.01275	0.212121	2.43477	0.680208	0.928797	0.931219	0.042824	0.073529	0.08184	0.697563	-99.7578
	0.01233	0.351351	2.05556	0.805769	1.14159	0.799342	0.037921	0.074074	0.13302	0.694257	-99.7575
	0.0108	0.24	2.09995	0.511012	0.872286	0.859215	0.040509	0.054507	0.1282	0.69097	-99.7563
	0.03263	0.8	2.40774	1.03739	1.36046	1.25287	0.058894	0.120261	0.3121	0.75506	-99.7553
	0.00814	0.166667	2.06111	0.79508	0.900451	0.96477	0.041214	0.074074	0.06279	0.683381	-99.7453
	0.01783	0.428571	2.38327	0.704896	1.01867	0.762444	0.038043	0.079012	0.10135	0.704479	-99.7442
	0.0162	0.259259	2.40171	0.737577	1.13616	0.783245	0.053136	0.075269	0.16415	0.709771	-99.7418
	0.04323	0.78125	2.48958	0.862647	1.17269	0.933727	0.070395	0.138528	0.31643	0.747424	-99.7413
	-0.00081	0.761905	1.65909	1.31957	1.41596	1.35236	0.008929	0.019324	0.04587	0.714522	-99.7399
	0.01199	0.368421	1.95852	0.465484	0.720475	0.645704	0.057465	0.061111	0.21625	0.695542	-99.7379
	0.00123	0.090909	2	0.801955	0.915805	1.03545	0.023649	0.046784	0	0.677163	-99.7378
	0.02285	0.8125	2.2043	0.926388	1.41266	1.13395	0.060721	0.093682	0.22093	0.72052	-99.736
	0.01354	0.4	2.0655	0.607834	1.06782	0.667979	0.035417	0.082305	0.19098	0.71267	-99.733
	0.01241	0.153846	2.1828	0.814516	0.945252	0.991378	0.039541	0.070922	0.11659	0.703043	-99.7323
	0.00867	0.32	2.03431	0.786514	0.96579	1.04934	0.046553	0.051587	0.0559	0.678539	-99.7295
	0.01171	0.354839	1.84251	0.657408	1.01005	0.784273	0.043033	0.06403	0.12565	0.697222	-99.7295
	0.01694	0.451613	2.11992	0.839131	1.23678	0.952457	0.046407	0.076389	0.14469	0.70694	-99.7263
	0.01451	0.258065	2.28333	0.782914	1.11737	0.807152	0.046086	0.078853	0.13274	0.705626	-99.726
	0.0231	0.454545	2.57552	0.839957	1.22211	1.1974	0.04375	0.070707	0.19406	0.736321	-99.7222
	0.01191	0.304348	1.96429	0.851035	0.981107	0.973084	0.048309	0.07197	0.1037	0.687512	-99.7222
	0.01788	0.071429	2.76852	0.562111	0.882202	0.9368	0.057726	0.088889	0.18	0.714525	-99.7222
	0.0318	0.470588	3.34615	0.599693	1.0686	1.0128	0.055556	0.093023	0.18044	0.735097	-99.7208
	0.0082	0.285714	1.941	0.672294	0.8558	0.838619	0.046007	0.071279	0.09061	0.69097	-99.7198
	0.01026	0.535714	1.89987	0.776153	1.07598	0.984188	0.040675	0.08642	0.08696	0.692512	-99.7163
	0.03134	0.914894	2.30601	0.955217	1.44852	1.18661	0.062147	0.11219	0.28402	0.73741	-99.7163
	0.03624	0.655172	2.23485	0.952714	1.08528	0.878333	0.064043	0.149306	0.27368	0.733026	-99.7116
	0.01077	0.4	1.92402	0.882626	1.14484	0.964943	0.050843	0.065844	0.09146	0.692512	-99.7064
	0.00899	0.35	2.13259	0.818965	0.936706	0.809697	0.045058	0.078078	0.1355	0.712448	-99.7051
	0.01168	0.304348	2.1393	0.678389	0.908444	1.05341	0.035511	0.059259	0.09655	0.697469	-99.705
	0.0318	0.470588	3.34615	0.599693	1.0686	1.0128	0.055556	0.093023	0.18044	0.735097	-99.7046
	0.02089	0.411765	2.70486	0.696474	1.07515	0.938705	0.072279	0.098611	0.21538	0.717635	-99.7043
	0.01855	0.304348	2.16997	0.702243	0.932323	0.923533	0.046512	0.082687	0.1726	0.719143	-99.703
	0.01284	0.684211	2.14015	1.20635	1.26017	1.26434	0.018519	0.074074	0.14826	0.73915	-99.6993
	0.01541	0.266667	2.46795	0.717339	1.03765	0.955601	0.034834	0.083789	0.09293	0.702749	-99.6977
	0.01556	0.291667	2.31409	0.630469	1.0727	0.848583	0.039444	0.065359	0.14583	0.708199	-99.6972
	0.01094	0.35	1.99228	0.821327	0.951218	0.793765	0.047256	0.080247	0.1532	0.71267	-99.6941
	0.01255	0.041667	2.37539	0.577136	0.869829	0.952388	0.03699	0.064815	0.12009	0.70317	-99.694
	0.03127	0.48	3.00476	0.649895	1.1148	1.00178	0.045198	0.097928	0.16246	0.72814	-99.694
	0.01537	0.454545	2.45772	0.724341	1.02316	0.823854	0.035714	0.07565	0.08369	0.704654	-99.693
	0.02547	0.291667	2.48889	0.843389	1.04971	0.888462	0.060227	0.085106	0.27381	0.738747	-99.6913
	0.01342	0.409091	2.20512	0.64217	1.0881	0.836896	0.045565	0.072327	0.14851	0.700753	-99.6912
	0.00215	0.3	1.99275	0.902792	0.927305	1.04101	0.039227	0.067901	0.02994	0.68035	-99.6884
	0.00877	0.277778	1.97145	0.788832	0.939957	0.997902	0.026157	0.052288	0.08451	0.699075	-99.6884
	0.02541	0.684211	2.84615	0.895878	1.31486	1.19914	0.043403	0.088889	0.20616	0.755059	-99.6876
	0.00721	0.222222	2.32353	0.846967	1.01472	1.21222	0.038043	0.059259	0.06211	0.706236	-99.687
	0.02396	0.130435	3.12255	0.563459	0.936315	1.02649	0.050847	0.091503	0.20112	0.735025	-99.687
	0.0184	0.361111	2.51556	0.710431	1.03857	1.00008	0.033241	0.08642	0.12631	0.713904	-99.6867
	0.01812	0.217391	2.42462	0.629423	1.00057	0.803196	0.039663	0.078704	0.20638	0.725983	-99.6854
	0.01554	0.405405	2.26228	0.532631	0.916504	0.879065	0.04184	0.076577	0.11155	0.693268	-99.6844
	0.01769	0.3	2.23395	0.598934	0.950777	0.809153	0.04063	0.088183	0.17191	0.709704	-99.6844
	0.00706	0.321429	2.07353	0.812888	1.10586	0.984994	0.029684	0.059829	0.04844	0.686172	-99.6834
	0.0318	0.470588	3.34615	0.599693	1.0686	1.0128	0.055556	0.093023	0.18044	0.735097	-99.6817
	0.01806	0.3125	2.45437	0.736144	1.11693	0.830441	0.041667	0.084175	0.1378	0.710828	-99.6815
	0.00893	0.571429	1.91905	0.956044	1.23943	0.984722	0.03548	0.065844	0.07968	0.691431	-99.678
	0.01673	0.290323	2.167	0.718794	0.975275	0.94259	0.048611	0.075397	0.18213	0.716929	-99.678
	-0.00093	1	1.51667	1.29307	1.33912	1.35842	0.030093	0.047619	0	0.681155	-99.6766
	0.00981	0.321429	2.30392	0.760454	1.04415	1.06906	0.047068	0.075472	0.05618	0.69097	-99.6749
	0.01474	0.40625	1.97857	0.950972	1.12599	1.02862	0.036058	0.076923	0.10742	0.705004	-99.6749
	0.0127	0.32	2.16733	0.566315	0.893545	0.868452	0.035405	0.076628	0.14593	0.701097	-99.6723
	0.01037	0	2.32113	0.459567	0.52955	0.746361	0.068896	0.072072	0.17857	0.693965	-99.6708
	0.01872	0.4	2.56609	0.676609	1.18913	0.89783	0.038856	0.062802	0.10289	0.704569	-99.6708
	0.02052	0.090909	2.88172	0.605107	0.910467	0.997856	0.040816	0.086957	0.17606	0.727201	-99.6679
Average values:->	0.0149554	0.362166	2.25011	0.77648	1.04374	0.954166	0.0441418	0.0769862	0.134013	0.707515	-99.7501

## Sheet: Table3
	Table 3. Least active 100 compounds containing top 10 positively correlated fingerprints and their maximum response values.
	ETA_EtaP_B	HybRatio	meanI	GATS1m	GATS1p	GATS2p	JGI3	JGI2	ETA_Shape_P	ASP-0	Maximum response
	0.02373	0.666667	2.08081	1.13011	1.18843	1.15662	0.059276	0.11329	0.21875	0.734103	3.82101
	0.02511	0.772727	2.40497	0.95167	1.40121	1.14664	0.058333	0.103359	0.25884	0.74016	3.83402
	0.02015	0.323529	2.45602	0.718552	0.992377	0.881113	0.045673	0.08254	0.16814	0.718075	3.8381
	0.02018	0.789474	2.58333	0.872045	1.50037	1.1664	0.061177	0.111111	0.26247	0.744449	3.84968
	0.01347	0.192308	2.11198	0.768086	0.884666	0.995066	0.051698	0.072016	0.08043	0.68349	3.87545
	0.00625	0	2.45238	0.554141	0.92435	0.96956	0.037847	0.067633	0.05128	0.681686	3.89338
	0.01379	0.28	2.08404	0.583439	0.900336	0.830267	0.047526	0.089669	0.15601	0.702251	3.90716
	0.01067	0.272727	2.58889	0.732436	1.00263	1.22117	0.04616	0.05291	0.09662	0.711557	3.97767
	0.02527	0.636364	2.65315	0.889571	1.22288	1.30181	0.04568	0.08793	0.22915	0.743368	3.99073
	0.01788	0.142857	2.57305	0.717897	0.777295	0.961434	0.051111	0.102564	0.16981	0.728942	3.99927
	0.01892	0.125	3.1	0.572325	0.971372	0.777126	0.027778	0.093567	0.22277	0.75061	4.02419
	0.02058	0.8	2.19333	0.899223	1.14357	1.08409	0.063998	0.116162	0.18056	0.712785	4.0425
	0.01847	0.176471	2.27654	0.735173	0.883758	0.817629	0.065891	0.074074	0.16622	0.708593	4.06707
	0.0832	1	5.975	1.66667	1.66667	1.38227	0.075	0.203704	0.57142	0.85	4.07618
	0.00438	0.333333	1.8	0.878562	1.04971	0.847432	0.037829	0.06734	0.05102	0.676337	4.11342
	0.01005	0.461538	2.3125	0.987781	1.23244	1.22132	0.046053	0.070175	0.163	0.737695	4.1387
	0.01445	0.46875	1.94956	0.826168	1.076	0.852547	0.05815	0.105634	0.12774	0.684904	4.14938
	0.01839	0.588235	2.36111	0.935185	1.5224	0.88071	0.044355	0.088889	0.24024	0.747891	4.18376
	0.0219	0.578947	2.62667	0.88317	1.26456	1.13219	0.058943	0.080247	0.24638	0.742405	4.20712
	0.02224	0.133333	2.60062	0.588895	0.807289	0.933976	0.047414	0.084291	0.22648	0.734915	4.21275
	0.01216	0.181818	2.13248	0.777599	0.967068	0.868955	0.052939	0.076389	0.11545	0.694751	4.22994
	0.02663	0.55	2.26389	0.900049	1.19493	0.94449	0.070139	0.127778	0.23529	0.730632	4.25027
	0.02261	0.837209	2.62366	1.00665	1.4564	1.4454	0.041912	0.079772	0.21488	0.749207	4.25291
	0.02271	0.178571	2.77137	0.695624	0.977826	0.962152	0.043347	0.077778	0.15873	0.721952	4.30225
	0.02365	0.307692	2.62143	0.687371	1.13801	0.885207	0.052273	0.072727	0.16756	0.718987	4.36988
	0.01621	0.444444	2.2402	0.859793	1.20061	0.91839	0.044374	0.094017	0.15528	0.712997	4.41839
	0.02461	0.75	2.66017	0.974964	1.30649	1.35896	0.054343	0.090909	0.22286	0.741488	4.55777
	0.01171	0.208333	2.25436	0.715847	1.03509	0.845625	0.039866	0.074074	0.14493	0.708199	4.58626
	0.01693	0.454545	2.70833	0.599878	1.1826	0.884927	0.049242	0.090278	0.16981	0.713783	4.64366
	0.02255	0.333333	2.50673	0.737376	0.916332	0.845162	0.047092	0.090278	0.24138	0.739803	4.71754
	0.01592	0.157895	2.52874	0.647632	1.13387	0.763633	0.049745	0.082126	0.15038	0.708388	4.7472
	0.0239	0.541667	2.50463	0.876205	1.34498	1.02758	0.065171	0.095861	0.19669	0.731768	4.79013
	0.01196	0.347826	2.02541	0.640286	0.969527	0.788211	0.049292	0.093333	0.10638	0.690566	4.88574
	0.01109	0.4	1.88194	0.870301	1.12262	0.973179	0.059193	0.079772	0.12931	0.69506	5.0041
	0.03598	0.846154	2.38158	1.14828	1.47398	1.1291	0.046875	0.138889	0.41825	0.792213	5.00595
	0.02709	0.76	2.25278	0.981282	1.31344	1.15296	0.05625	0.085106	0.24706	0.735056	5.08359
	0.02394	0.117647	2.94687	0.575857	0.964266	0.826602	0.053779	0.088889	0.25833	0.744449	5.14073
	0.00725	0.148148	2.32407	0.690766	0.957431	1.13316	0.028826	0.061728	0.0396	0.687335	5.21082
	0.02166	0.533333	2.4314	0.8546	1.33001	1.00464	0.068056	0.08254	0.1424	0.715558	5.35279
	0.02013	0.5	2.56099	0.799839	1.49303	1.05388	0.064043	0.102564	0.18569	0.726024	5.43603
	0.00417	0.357143	2.06349	0.723429	1.22105	0.701947	0.042101	0.065359	0.05137	0.677802	5.45941
	0.01886	0.285714	2.38112	0.748727	0.871755	0.922402	0.062796	0.072562	0.16818	0.713567	5.53329
	0.00656	0.708333	1.98276	1.00425	1.29576	1.12871	0.057326	0.060606	0.08413	0.697137	5.71756
	0.02302	0.6	2.4798	0.961823	1.36321	1.20385	0.045058	0.068783	0.24946	0.751599	5.71828
	0.02817	0.238095	2.89397	0.658929	0.832254	0.918525	0.054078	0.092593	0.191	0.734154	5.81318
	0.01179	0.277778	2.09774	0.590287	0.893145	0.861502	0.043677	0.091168	0.13287	0.69506	5.89923
	0.03015	0.777778	2.07222	1.15611	1.23008	1.16435	0.065193	0.106481	0.24138	0.736803	5.90875
	0.01034	0.217391	2.03448	0.802082	1.02991	0.943654	0.033302	0.080808	0.10791	0.697137	6.07822
	0.01711	0.363636	2.58046	0.827586	1.21042	1.11677	0.039634	0.079772	0.175	0.73191	6.13052
	0.01836	0.230769	2.40535	0.585822	1.07416	0.731576	0.062739	0.074074	0.26136	0.733591	6.19806
	0.01872	0.625	3.2549	0.768993	1.46057	1.13537	0.051136	0.111111	0.23148	0.755088	6.26524
	0.01221	0	2.51211	0.695765	0.641823	0.984574	0.052989	0.089947	0.11082	0.702261	6.40479
	0.00727	0.4375	2.36364	0.735341	1.12594	0.939834	0.05	0.074074	0.06622	0.686549	6.51114
	-0.00093	1	1.51667	1.29307	1.33912	1.35842	0.030093	0.047619	0	0.681155	6.61758
	0.03015	0.777778	2.07222	1.15611	1.23008	1.16435	0.065193	0.106481	0.24138	0.736803	6.70388
	0.03163	0.904762	2.4	0.992235	1.27448	1.08992	0.066346	0.134213	0.25658	0.731971	6.73221
	0.03555	0.6	3.32381	0.824788	1.36742	1.39442	0.058511	0.083951	0.33843	0.779776	6.73367
	0.02866	0.757576	2.13377	1.08922	1.3726	1.16656	0.054825	0.090535	0.27523	0.74888	6.79768
	0.02146	0.941176	1.95	1.14203	1.52701	1.1343	0.063844	0.103704	0.2439	0.737536	6.80847
	0.01985	0.157895	2.45383	0.590619	0.904217	0.767589	0.063657	0.079772	0.22718	0.725499	6.93174
	0.0078	0.304348	2.20988	0.808266	0.998584	1.11054	0.036632	0.065041	0.05168	0.690356	6.9424
	0.02318	0.52	2.32179	0.877798	1.25286	1.00205	0.045999	0.090209	0.21335	0.725597	7.01119
	0.02118	0.133333	2.44973	0.631632	0.713434	0.740769	0.074157	0.066667	0.22082	0.733591	7.01926
	0.02951	0.1875	2.7614	0.495455	0.747153	0.679666	0.068936	0.079365	0.27196	0.733081	7.09467
	0.00623	0.3	2.12	0.771013	1.13104	0.908511	0.042361	0.079772	0.07022	0.689016	7.21866
	0.03135	0.363636	2.3718	0.875945	1.02445	0.892065	0.056944	0.113695	0.24193	0.735097	7.21916
	0.01871	0	2.78947	0.791885	0.775443	1.15796	0.045673	0.090535	0.15094	0.727793	7.42036
	0.01534	0.454545	2.0641	0.938062	1.33552	0.808158	0.04375	0.08642	0.24324	0.734772	7.45777
	0.02661	0.642857	2.05	1.04315	1.17908	1.0228	0.08443	0.111111	0.25	0.736803	7.48778
	0.00471	0.210526	2.26667	0.762105	0.901123	0.921641	0.045228	0.068376	0.05666	0.689016	7.54109
	0.01954	0.107143	2.6047	0.632019	0.993411	0.87279	0.041553	0.071685	0.12176	0.706932	7.68957
	0.00337	0.428571	2.12698	0.72906	1.05593	1.15702	0.052399	0.065359	0.0411	0.677802	7.79251
	0.01639	0.354839	2.08333	0.847999	1.1564	0.924521	0.039959	0.07286	0.12613	0.702749	7.97759
	0.03116	0.52381	2.39243	0.718193	1.13207	0.948967	0.059783	0.102981	0.32717	0.753815	7.98294
	0.03767	0.85	2.11594	1.05278	1.29048	1.0524	0.085254	0.132275	0.28788	0.743305	8.32629
	0.00531	0.210526	2.17949	0.79011	0.993524	1.03049	0.034722	0.051282	0.02725	0.683437	8.48712
	0.02324	0.2	2.68391	0.774063	1.1474	0.95264	0.038462	0.077778	0.21105	0.737536	8.66591
	0.01405	0.076923	2.36702	0.590094	0.916398	0.798325	0.060684	0.077973	0.1637	0.705414	8.73997
	0.02741	0.285714	2.32639	0.959643	1.15428	0.820362	0.064338	0.097222	0.31884	0.761486	8.85807
	0.02772	0	3.60606	0.67604	0.945618	1.0981	0.066964	0.103704	0.29068	0.766429	8.88609
	0.02062	0.517241	2.53378	0.782414	1.15001	1.0196	0.052632	0.080808	0.1471	0.718345	9.15523
	0.02155	0.32	2.42402	0.697698	1.12197	0.963392	0.066955	0.074747	0.15601	0.706906	9.18818
	0.00215	0.25	2.19565	0.698028	1.04649	0.792686	0.037162	0.061728	0.03692	0.68035	9.24071
	0.01028	0.235294	2.19841	0.76388	1.05318	0.821874	0.036184	0.076285	0.10906	0.695633	9.92447
	0.01097	0.166667	2.32883	0.789659	1.02385	1.02944	0.038636	0.071279	0.08555	0.703702	10.0344
	0.01838	0.473684	2.57407	0.737979	1.17786	0.948695	0.053922	0.075397	0.18554	0.714525	10.0401
	0.03037	0.777778	2.06111	1.15611	1.23008	1.16435	0.061366	0.106481	0.24138	0.736803	10.1431
	0.0326	0.93617	2.52692	0.94926	1.31113	1.12762	0.068426	0.130719	0.25424	0.732489	10.2905
	0.03135	0.363636	2.3718	0.875945	1.02445	0.892065	0.056944	0.113695	0.24193	0.735097	10.7456
	0.00799	0.428571	2.42949	0.773608	1.0818	0.985107	0.049797	0.076023	0.13842	0.712242	10.7665
	0.00474	0.058824	2.09848	0.679994	0.887519	0.963002	0.029208	0.069841	0.04762	0.679134	11.3206
	0.01879	0.625	2.92708	0.779617	1.35714	1.10736	0.069746	0.092593	0.20192	0.731671	11.48
	0.01092	0.181818	2.02341	0.567622	0.897644	0.896203	0.045479	0.069444	0.12203	0.688188	12.1618
	0.00289	0.105263	2.15217	0.738562	0.914842	1.03034	0.049224	0.055556	0.03039	0.68035	13.121
	0.02811	0.777778	1.94253	1.18589	1.24015	1.15258	0.059934	0.10628	0.22353	0.732201	13.6191
	0.00874	0.136364	2.28846	0.815788	0.962101	1.15648	0.020833	0.04321	0.05376	0.699693	13.8159
	0.03037	0.777778	2.06111	1.15611	1.23008	1.16435	0.061366	0.106481	0.24138	0.736803	15.3784
	0.02024	0.411765	2.37916	0.500088	0.667107	0.624391	0.050305	0.084084	0.32192	0.741047	16.5217
	0.01352	0.2	2.39683	0.712168	0.953496	0.941134	0.054012	0.080808	0.1745	0.713465	20.9284
	0.02741	0.285714	2.32639	0.959643	1.15428	0.820362	0.064338	0.097222	0.31884	0.761486	23.013
Average values:->	0.0192334	0.417828	2.40908	0.823639	1.11485	0.997011	0.0524384	0.0874252	0.182599	0.721809	7.06857

## Sheet: Table4
Table 4. Top 10 positively correlated fingerprints and their average values for highly active and least active compounds.
Fingerprint	Highly active compounds (n=100)	Least active compounds (n=100)
ETA_EtaP_B	0.0149554	0.0192334
HybRatio	0.362166	0.417828
meanI	2.25011	2.40908
GATS1m	0.77648	0.823639
GATS1p	1.04374	1.11485
GATS2p	0.954166	0.997011
JGI3	0.0441418	0.0524384
JGI2	0.0769862	0.0874252
ETA_Shape_P	0.134013	0.182599
ASP-0	0.707515	0.721809
Maximum response	-99.7501	7.06857
